# Supplementary material for: Smart Approaches for Evaluating Photosynthetically Active Radiation at Various Stations Based on MSG Prime Satellite Imagery
Source: MDPI journal article supplement (doi:10.3390/atmos14081259), 2023-08-08
Supplement: s1 [file s1]

## Supplementary Materials:

# Smart Approaches for Evaluating Photosynthetically Active Radiation at Various Stations Based on MSG Prime Satellite Imagery

Claire Thomas <sup>1</sup>, William Wandji Nyamsi <sup>2,3,4,\*</sup>, Antti Arola <sup>2</sup>, Uwe Pfeifroth <sup>5</sup>, Jörg Trentmann <sup>5</sup>, Stephen Dorling <sup>6</sup>, Agustín Laguarda <sup>7</sup>, Milan Fischer <sup>8</sup> and Alexandr Aculinin <sup>9</sup>

### List of figures:

- ◇ Figure S1: Validation results for group “Western Europe” gathering 7 oceanic stations and for each method. a) MBE (%); b) STDEV (%); c) RMSE (%); d) CC. The 3 colors depict the SSIs from which methods are computed: from HC3 in purple, from CAMS-Rad in turquoise, and from SARA3 in kaki. Methods are M1: Jacovides from HC3, M2: Udo et Aro from HC3, M3: Szeicz from HC3, M4: Weighted\_Kato with BB CMF from HC3, M5: Weighted\_Kato with PAR CMF from HC3, M6: Jacovides from CAMS-Rad, M7: Udo et Aro from CAMS-Rad, M8: Szeicz from CAMS-Rad, M9: Weighted\_Kato with BB CMF from CAMS-Rad, M10: Weighted\_Kato with PAR CMF from CAMS-Rad, and M11: DWD SARA3
- ◇ Figure S2: Idem for group “Central Europe”
- ◇ Figure S3: Idem for group “Mediterranean”
- ◇ Figure S4: Idem for group “Eastern Europe”
- ◇ Figure S5: Idem for group “Central Spain”
- ◇ Figure S6: Idem for group “Congo”
- ◇ Figure S7: Idem for group “Moldova”
- ◇ Figure S8: Idem for group “Israel”
- ◇ Figure S9: Idem for group “French Guyana”
- ◇ Figure S10: Idem for group “Uruguay”
- ◇ Figure S11: Idem for group “South Africa”
- ◇ Figure S12: Idem for group “Senegal”
- ◇ Figure S13: Map of k-means clustering with k=12 based on the variables Precipitation, Temperature, Downward Shortwave Radiation, Enhanced Vegetation Index, and Fraction of Absorbed Photosynthetically Active Radiation (Zscheischler et al. 2012).
- ◇ Figure S14: Map with the podiums of method performance per group
- ◇ Figure S15: Map with the optimal coefficients to estimate PAR from GHI per group in the geographical coverage of MSG prime.

### List of tables:

- ◇ Table S1: Validation results for the comparison between the 11 methods to estimate PAR from satellite imagery at the 33 in-situ stations in all-weather conditions.
- ◇ Table S2: Validation results for the comparison between the 11 methods to estimate PAR from satellite imagery at the 33 in-situ stations in cloud-free conditions (PAR CMF > 0.8)
- ◇ Table S3: Validation results for the comparison between the 11 methods to estimate PAR from satellite imagery at the 33 in-situ stations in overcast conditions (PAR CMF < 0.3)

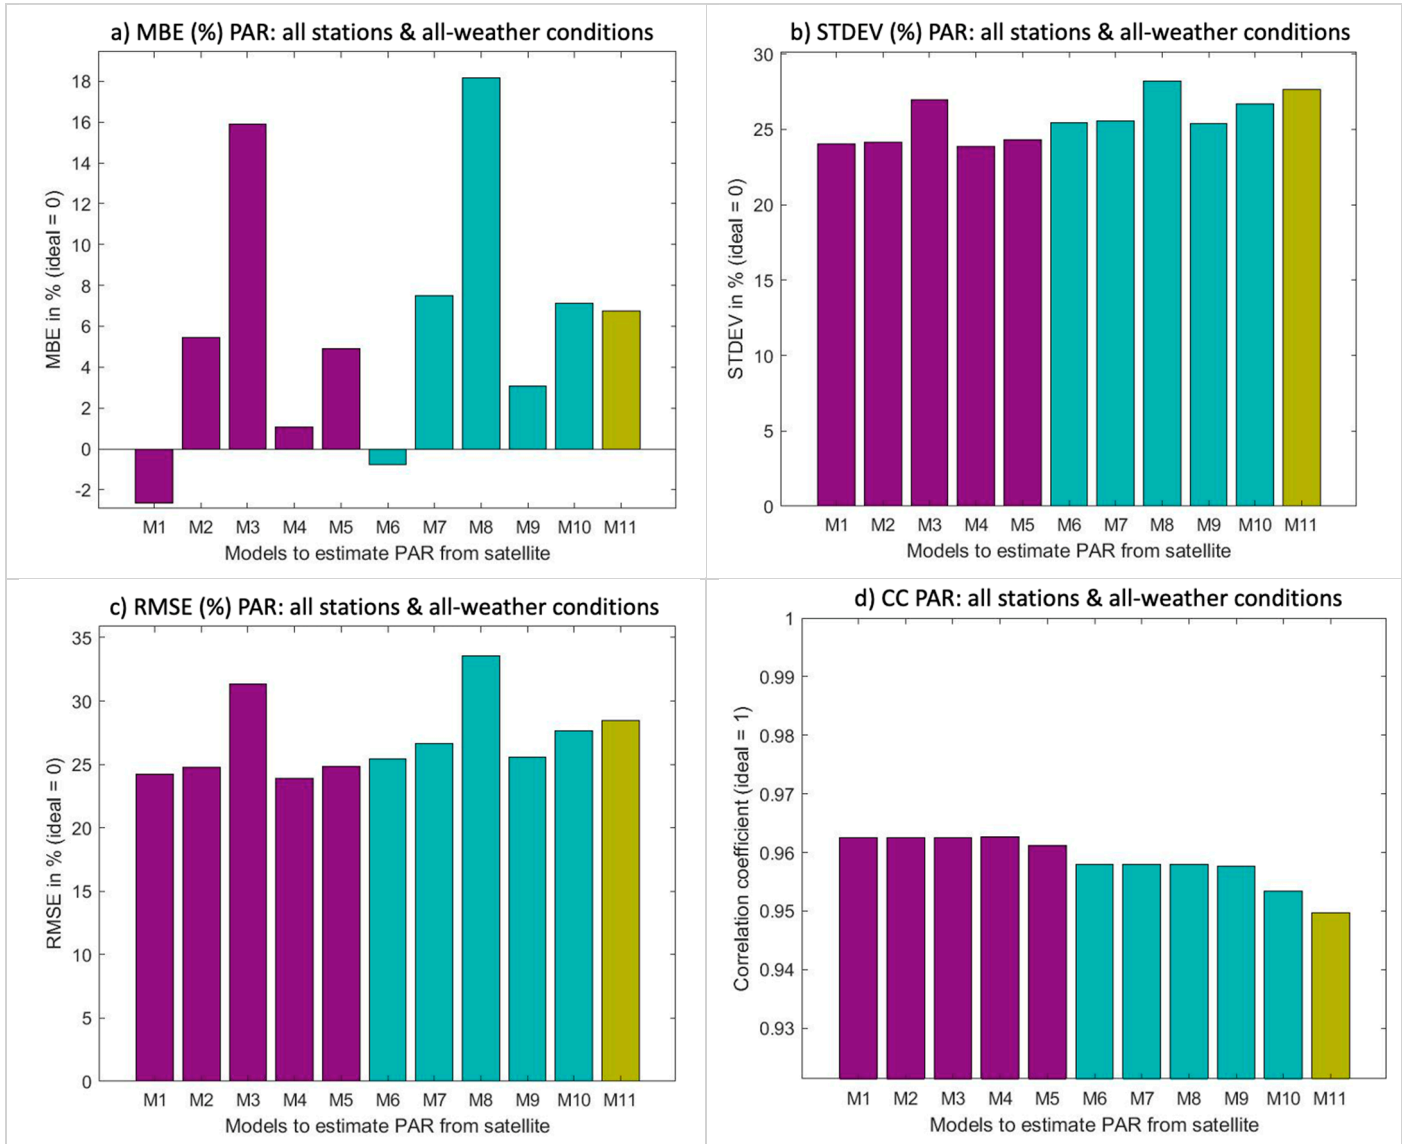

Figure S2. Validation results for group “Central Europe” gathering 6 continental stations and for each method. a) MBE (%); b) STDEV (%); c) RMSE (%); d) CC. The 3 colors depict the SSIs from which methods are computed: from HC3 in purple, from CAMS-Rad in turquoise, and from SARAH-3 in kaki. Methods are M1: Jacovides from HC3, M2: Udo et Aro from HC3, M3: Szeicz from HC3, M4: Weighted\_Kato with BB CMF from HC3, M5: Weighted\_Kato with PAR CMF from HC3, M6: Jacovides from CAMS-Rad, M7: Udo et Aro from CAMS-Rad, M8: Szeicz from CAMS-Rad, M9: Weighted\_Kato with BB CMF from CAMS-Rad, M10: Weighted\_Kato with PAR CMF from CAMS-Rad, and M11: DWD SARAH-3.

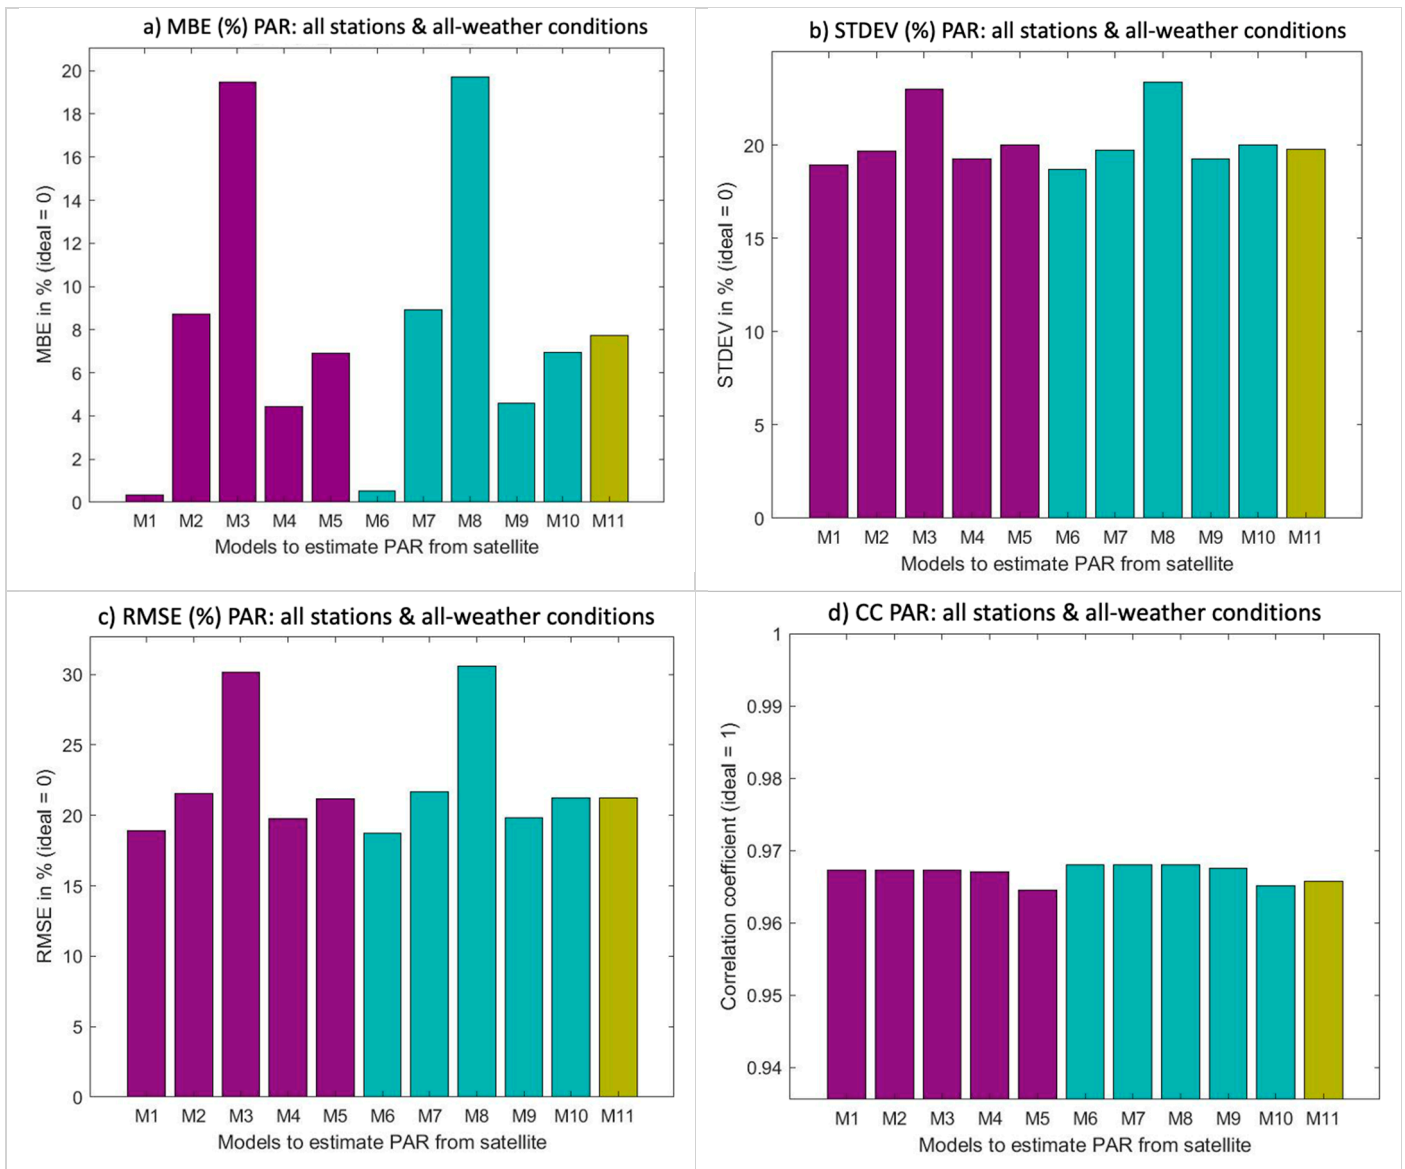

Figure S3: Validation results for group "Mediterranean" gathering 5 stations and for each method. a) MBE (%); b) STDEV (%); c) RMSE (%); d) CC. The 3 colors depict the SSIs from which methods are computed: from HC3 in purple, from CAMS-Rad in turquoise, and from SARAH-3 in kaki. Methods are M1: Jacovides from HC3, M2: Udo et Aro from HC3, M3: Szeicz from HC3, M4: Weighted\_Kato with BB CMF from HC3, M5: Weighted\_Kato with PAR CMF from HC3, M6: Jacovides from CAMS-Rad, M7: Udo et Aro from CAMS-Rad, M8: Szeicz from CAMS-Rad, M9: Weighted\_Kato with BB CMF from CAMS-Rad, M10: Weighted\_Kato with PAR CMF from CAMS-Rad, and M11: DWD SARAH-3

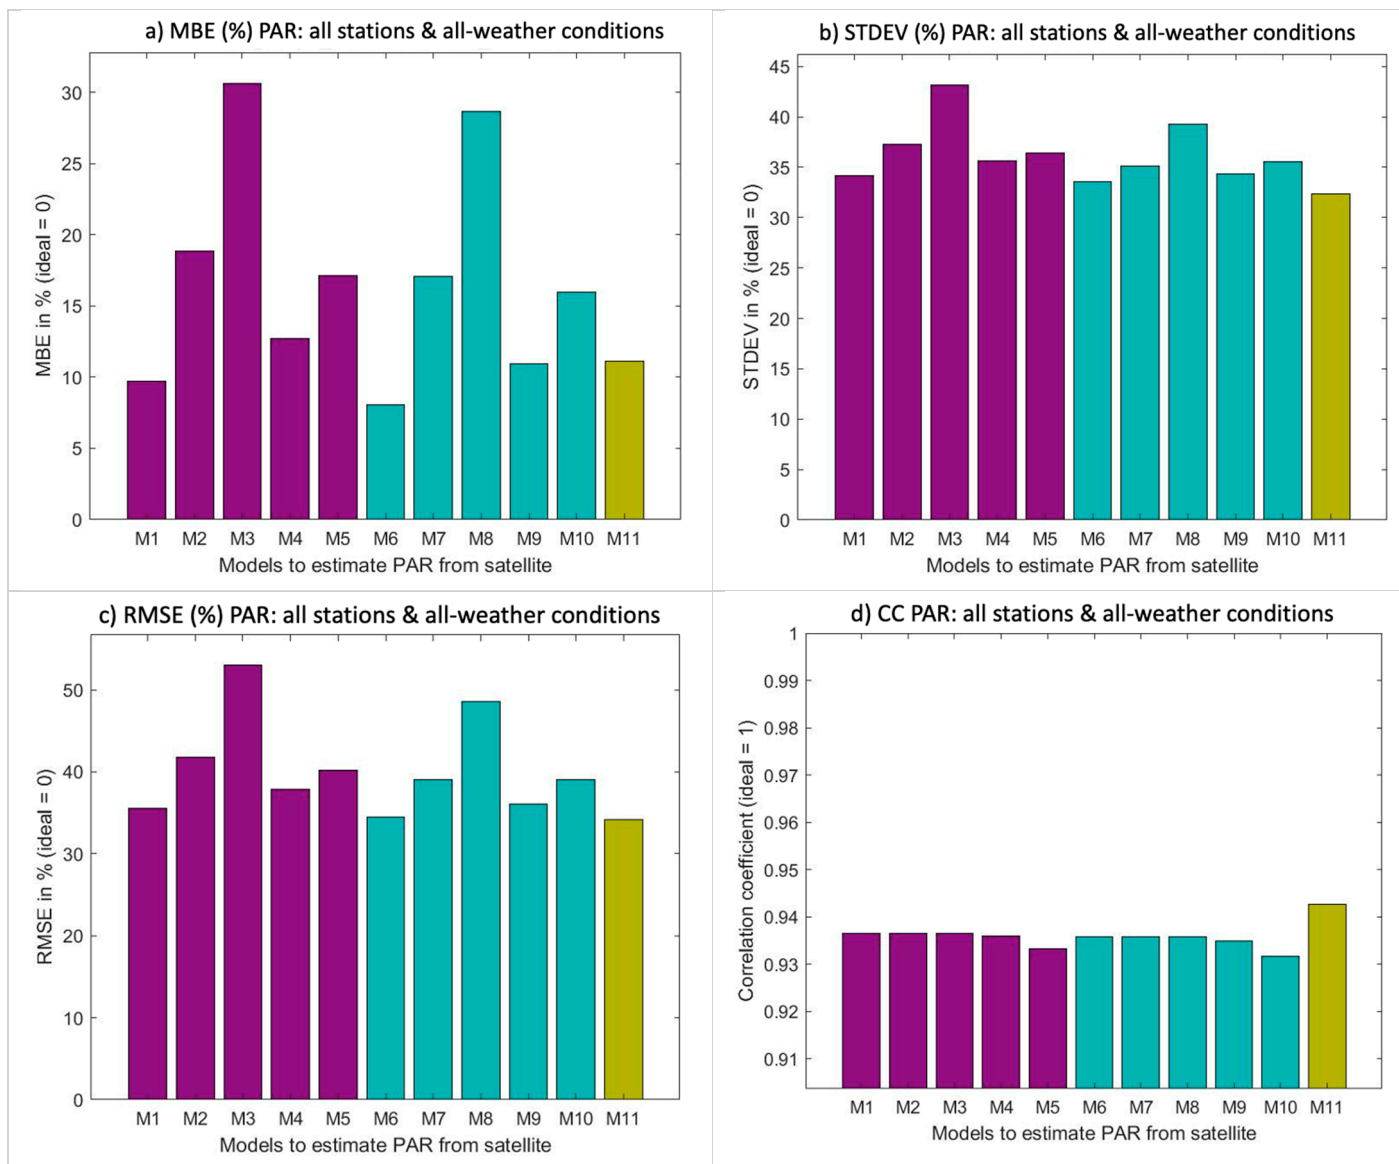

Figure S4: Validation results for group “Eastern Europe” gathering 4 stations located on the eastern part of Europe and for each method. a) MBE (%); b) STDEV (%); c) RMSE (%); d) CC. The 3 colors depict the SSIs from which methods are computed: from HC3 in purple, from CAMS-Rad in turquoise, and from SARA-3 in kaki. Methods are M1: Jacovides from HC3, M2: Udo et Aro from HC3, M3: Szeicz from HC3, M4: Weighted\_Kato with BB CMF from HC3, M5: Weighted\_Kato with PAR CMF from HC3, M6: Jacovides from CAMS-Rad, M7: Udo et Aro from CAMS-Rad, M8: Szeicz from CAMS-Rad, M9: Weighted\_Kato with BB CMF from CAMS-Rad, M10: Weighted\_Kato with PAR CMF from CAMS-Rad, and M11: DWD SARA-3



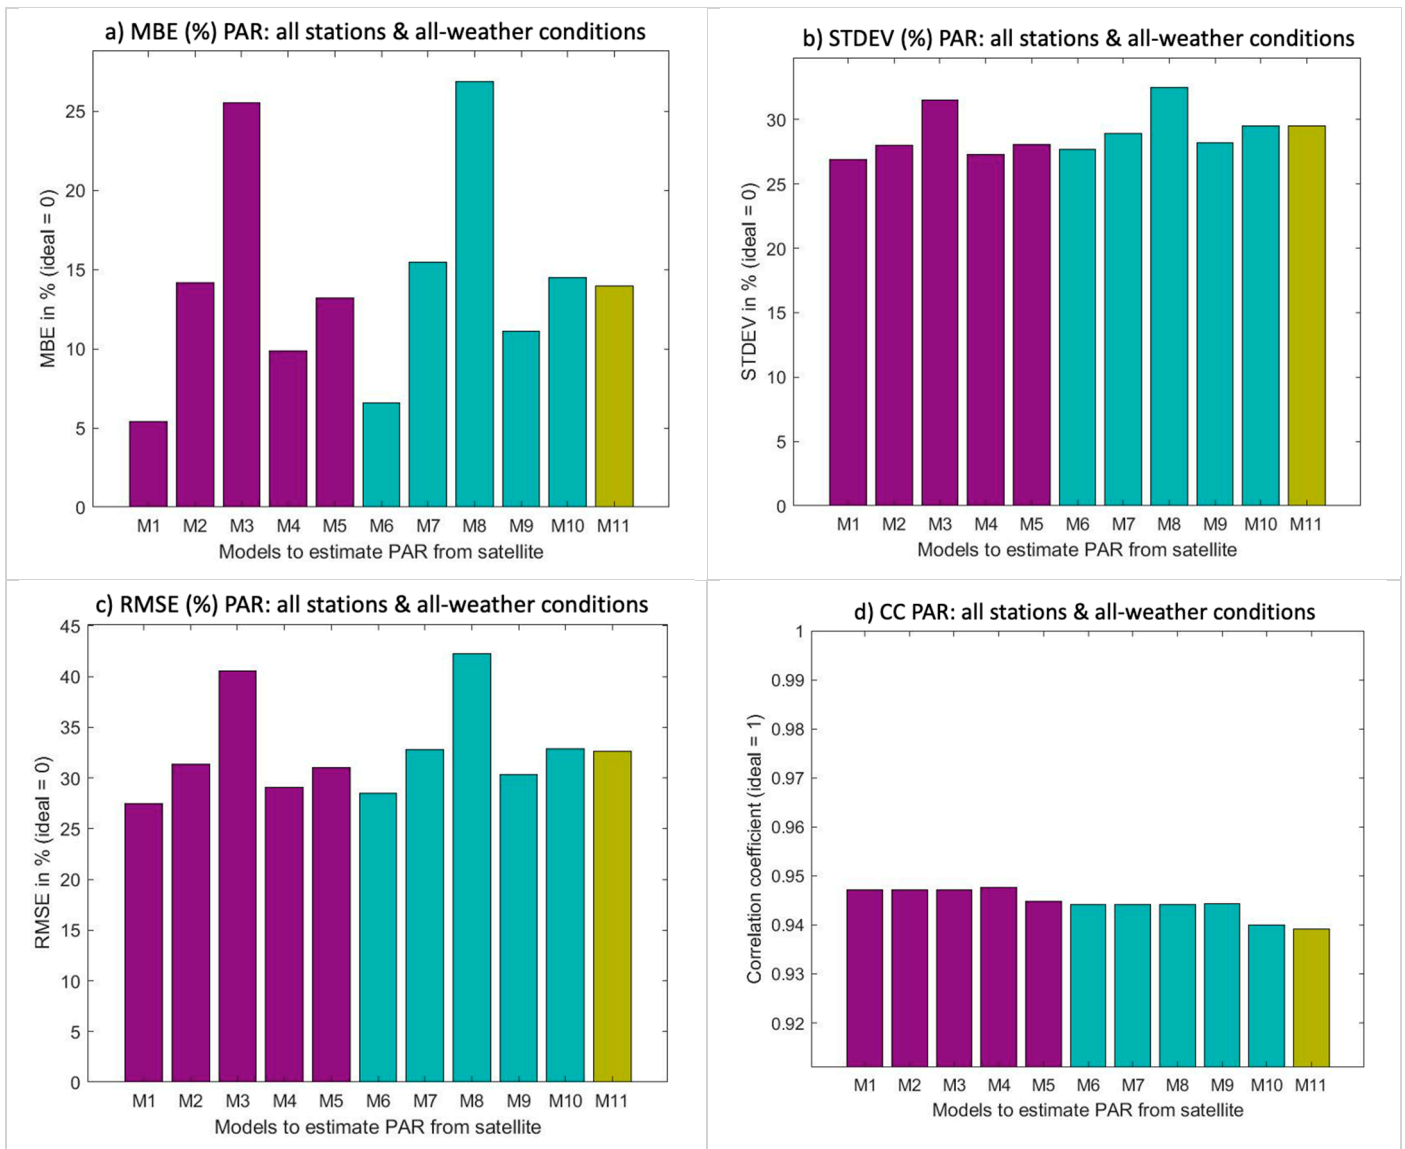

Figure S5: Validation results for group “Central Spain” gathering 3 stations and for each method. a) MBE (%); b) STDEV (%); c) RMSE (%); d) CC. The 3 colors depict the SSIs from which methods are computed: from HC3 in purple, from CAMS-Rad in turquoise, and from SARAH-3 in kaki. Methods are M1: Jacovides from HC3, M2: Udo et Aro from HC3, M3: Szeicz from HC3, M4: Weighted\_Kato with BB CMF from HC3, M5: Weighted\_Kato with PAR CMF from HC3, M6: Jacovides from CAMS-Rad, M7: Udo et Aro from CAMS-Rad, M8: Szeicz from CAMS-Rad, M9: Weighted\_Kato with BB CMF from CAMS-Rad, M10: Weighted\_Kato with PAR CMF from CAMS-Rad, and M11: DWD SARAH-3

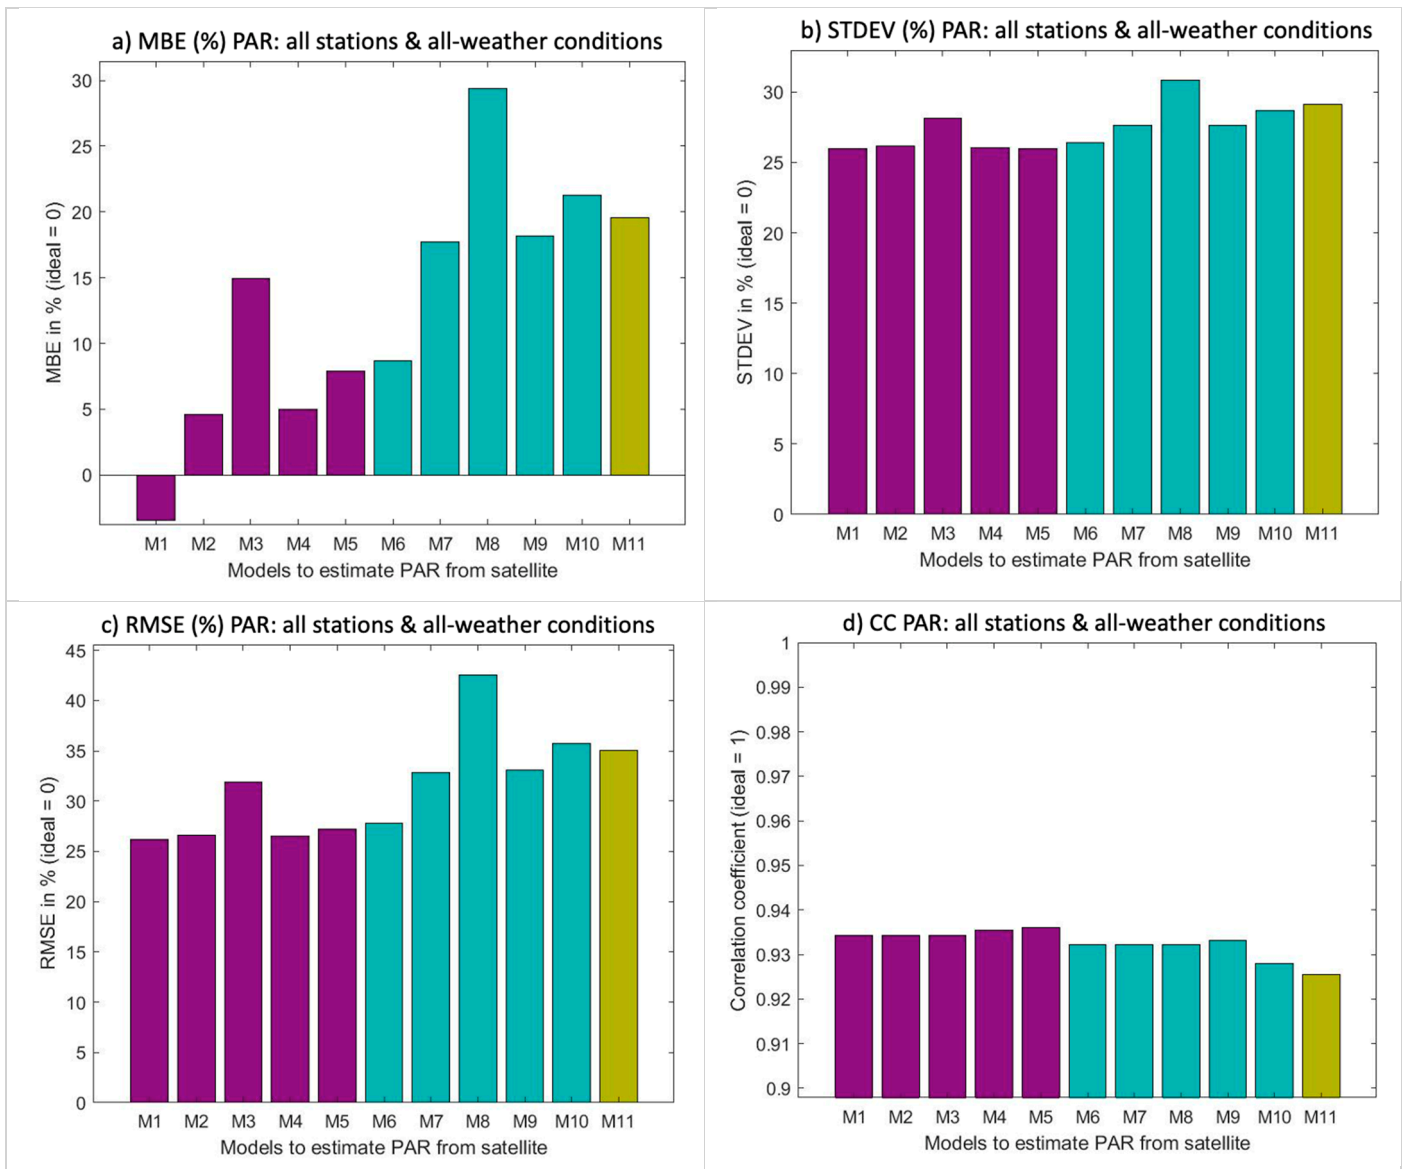

Figure S6: Validation results for Congo composed of a single station of Pokola and for each method. a) MBE (%); b) STDEV (%); c) RMSE (%); d) CC. The 3 colors depict the SSIs from which methods are computed: from HC3 in purple, from CAMS-Rad in turquoise, and from SARAH-3 in kaki. Methods are M1: Jacovides from HC3, M2: Udo et Aro from HC3, M3: Szeicz from HC3, M4: Weighted\_Kato with BB CMF from HC3, M5: Weighted\_Kato with PAR CMF from HC3, M6: Jacovides from CAMS-Rad, M7: Udo et Aro from CAMS-Rad, M8: Szeicz from CAMS-Rad, M9: Weighted\_Kato with BB CMF from CAMS-Rad, M10: Weighted\_Kato with PAR CMF from CAMS-Rad, and M11: DWD SARAH-3

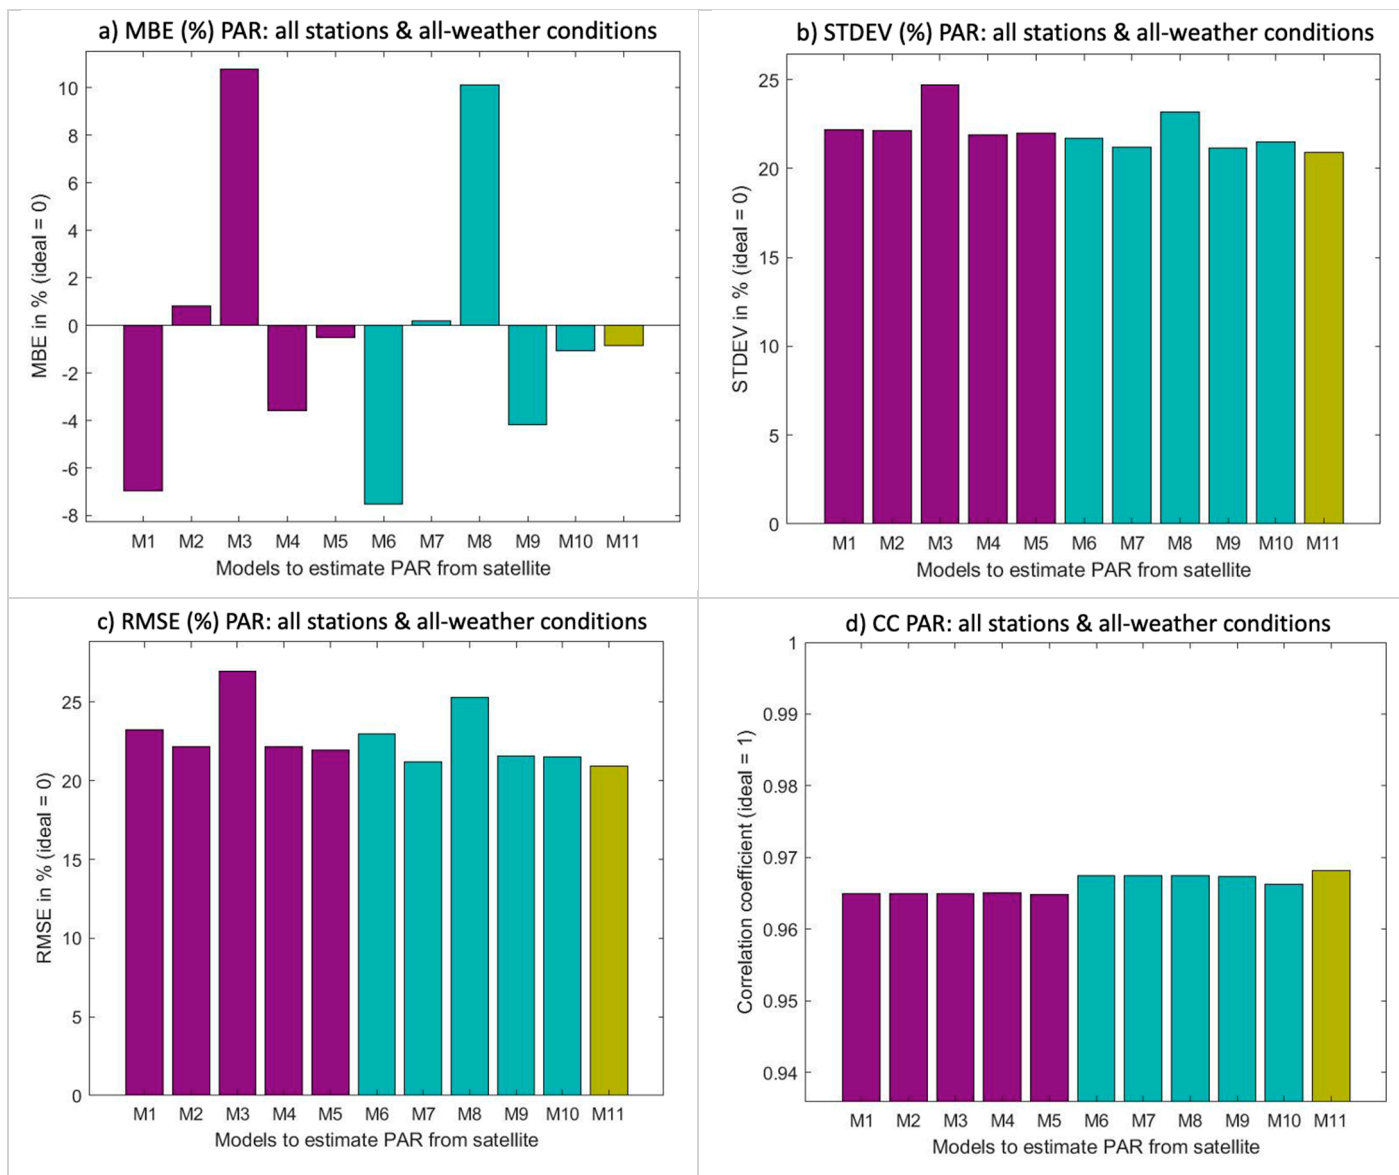

Figure S7: Validation results for Moldova composed of a single station of Kishinev and for each method. a) MBE (%); b) STDEV (%); c) RMSE (%); d) CC. The 3 colors depict the SSIs from which methods are computed: from HC3 in purple, from CAMS-Rad in turquoise, and from SARAH-3 in kaki. Methods are M1: Jacovides from HC3, M2: Udo et Aro from HC3, M3: Szeicz from HC3, M4: Weighted\_Kato with BB CMF from HC3, M5: Weighted\_Kato with PAR CMF from HC3, M6: Jacovides from CAMS-Rad, M7: Udo et Aro from CAMS-Rad, M8: Szeicz from CAMS-Rad, M9: Weighted\_Kato with BB CMF from CAMS-Rad, M10: Weighted\_Kato with PAR CMF from CAMS-Rad, and M11: DWD SARAH-3

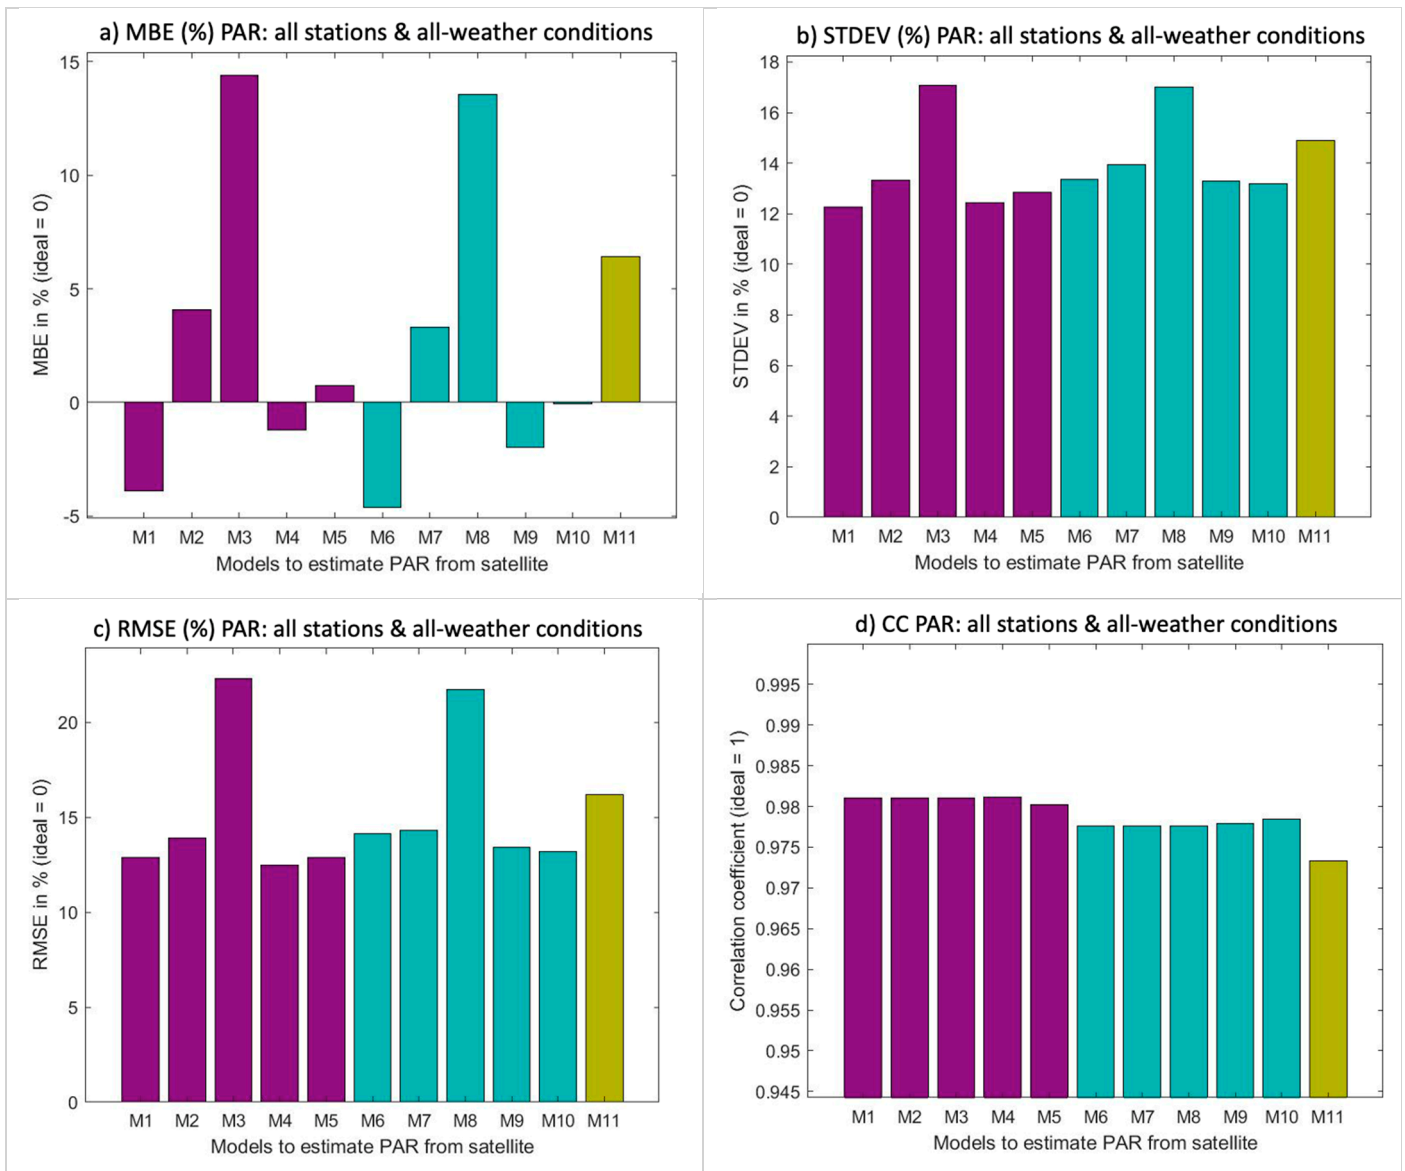

Figure S8: Validation results for Israel composed of a single station of EFDC\_IL-Yat and for each method. a) MBE (%); b) STDEV (%); c) RMSE (%); d) CC. The 3 colors depict the SSIs from which methods are computed: from HC3 in purple, from CAMS-Rad in turquoise, and from SARAH-3 in kaki. Methods are M1: Jacovides from HC3, M2: Udo et Aro from HC3, M3: Szeicz from HC3, M4: Weighted\_Kato with BB CMF from HC3, M5: Weighted\_Kato with PAR CMF from HC3, M6: Jacovides from CAMS-Rad, M7: Udo et Aro from CAMS-Rad, M8: Szeicz from CAMS-Rad, M9: Weighted\_Kato with BB CMF from CAMS-Rad, M10: Weighted\_Kato with PAR CMF from CAMS-Rad, and M11: DWD SARAH-3

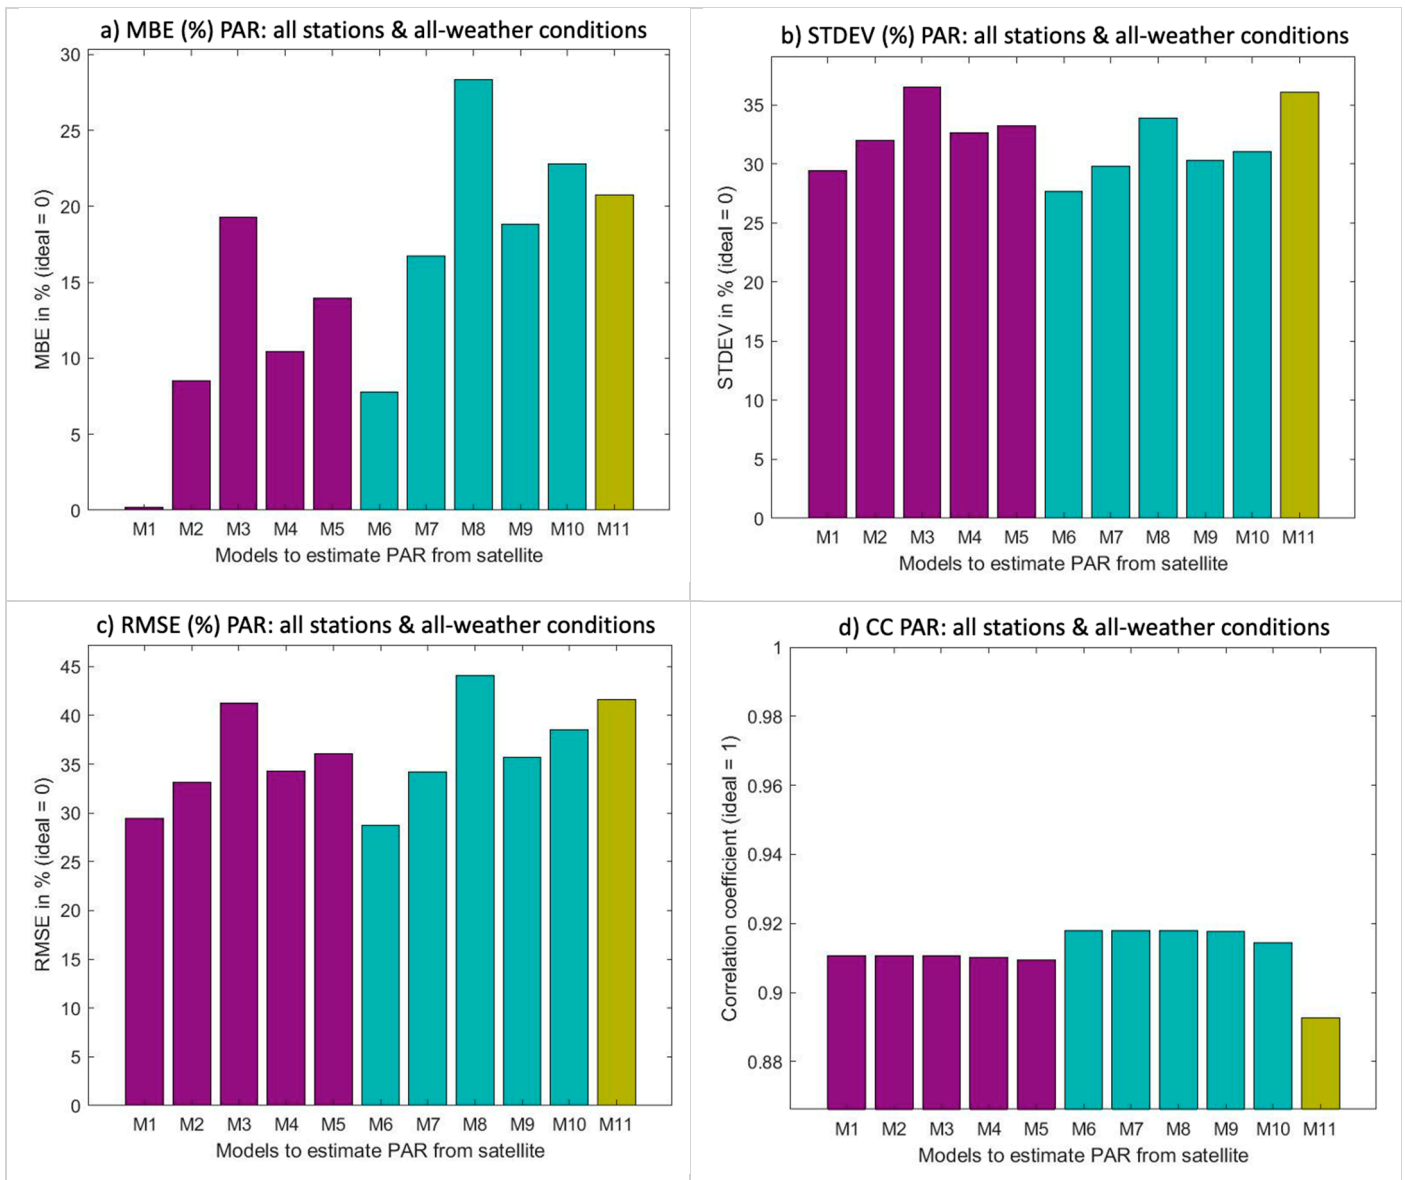

Figure S9: Validation results for French-Guyana composed of a single station of EFDG\_GF-Guy and for each method. a) MBE (%); b) STDEV (%); c) RMSE (%); d) CC. The 3 colors depict the SSIs from which methods are computed: from HC3 in purple, from CAMS-Rad in turquoise, and from SARAH-3 in kaki. Methods are M1: Jacovides from HC3, M2: Udo et Aro from HC3, M3: Szeicz from HC3, M4: Weighted\_Kato with BB CMF from HC3, M5: Weighted\_Kato with PAR CMF from HC3, M6: Jacovides from CAMS-Rad, M7: Udo et Aro from CAMS-Rad, M8: Szeicz from CAMS-Rad, M9: Weighted\_Kato with BB CMF from CAMS-Rad, M10: Weighted\_Kato with PAR CMF from CAMS-Rad, and M11: DWD SARAH-3

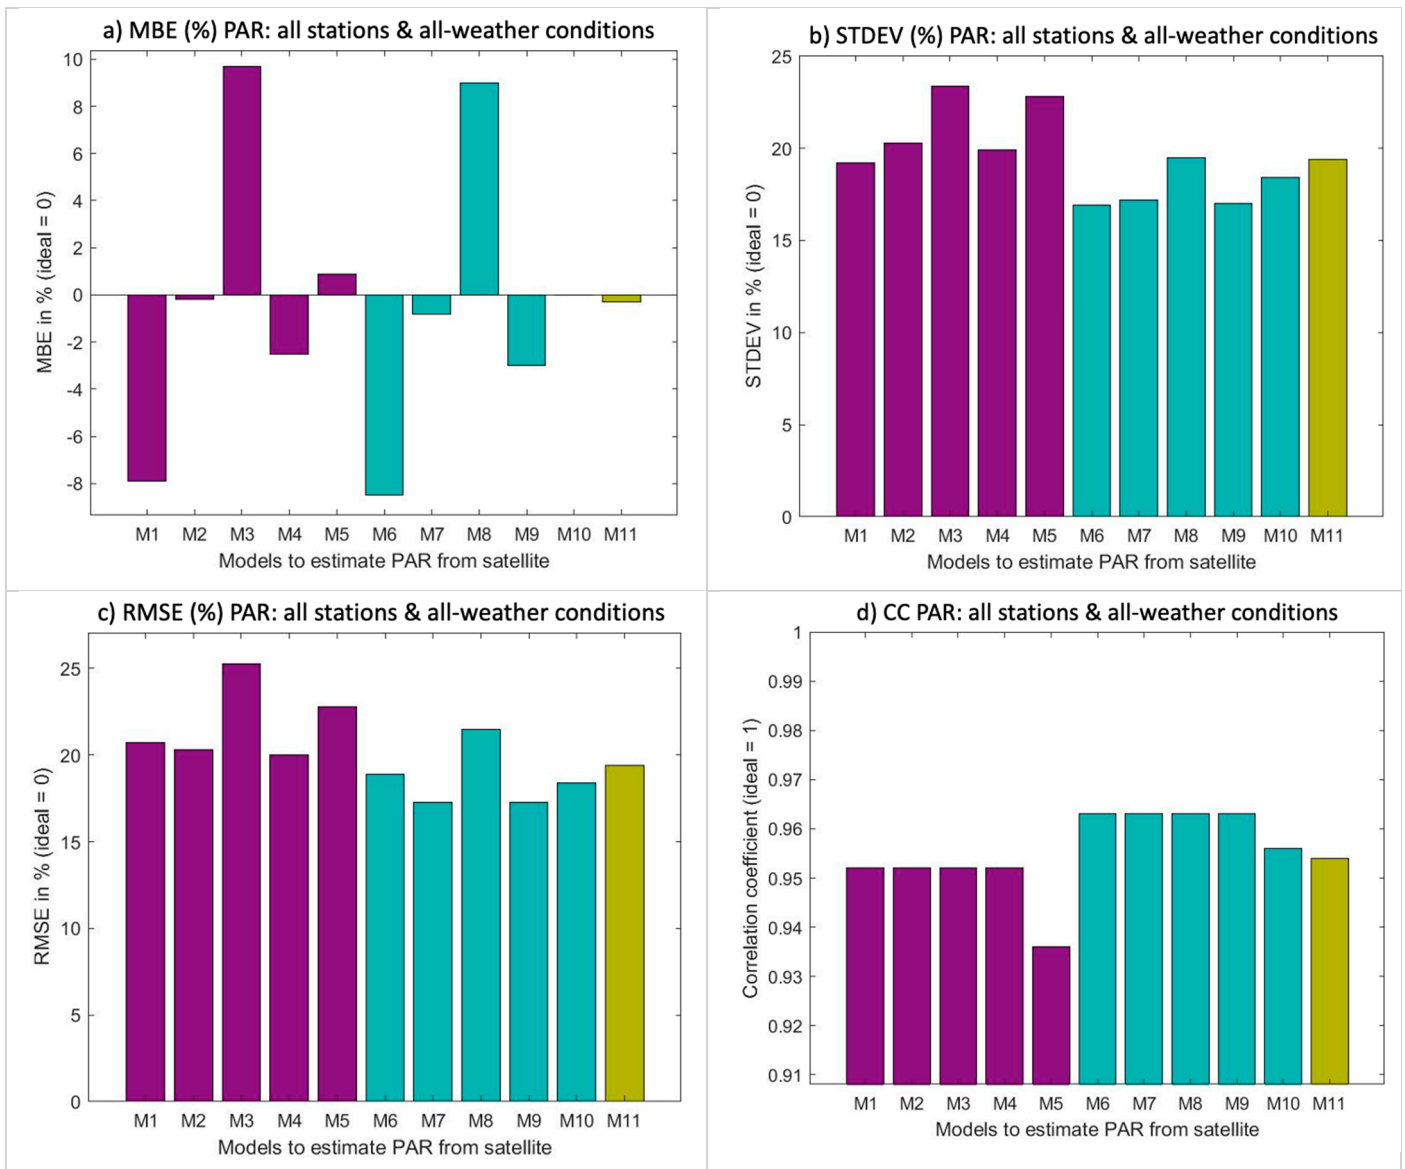

Figure S10: Validation results for Uruguay composed of a single station located nearby the city of Concordia and for each method. a) MBE (%); b) STDEV (%); c) RMSE (%); d) CC. The 3 colors depict the SSIs from which methods are computed: from HC3 in purple, from CAMS-Rad in turquoise, and from SARA3 in kaki. Methods are M1: Jacovides from HC3, M2: Udo et Aro from HC3, M3: Szeicz from HC3, M4: Weighted\_Kato with BB CMF from HC3, M5: Weighted\_Kato with PAR CMF from HC3, M6: Jacovides from CAMS-Rad, M7: Udo et Aro from CAMS-Rad, M8: Szeicz from CAMS-Rad, M9: Weighted\_Kato with BB CMF from CAMS-Rad, M10: Weighted\_Kato with PAR CMF from CAMS-Rad, and M11: DWD SARA3

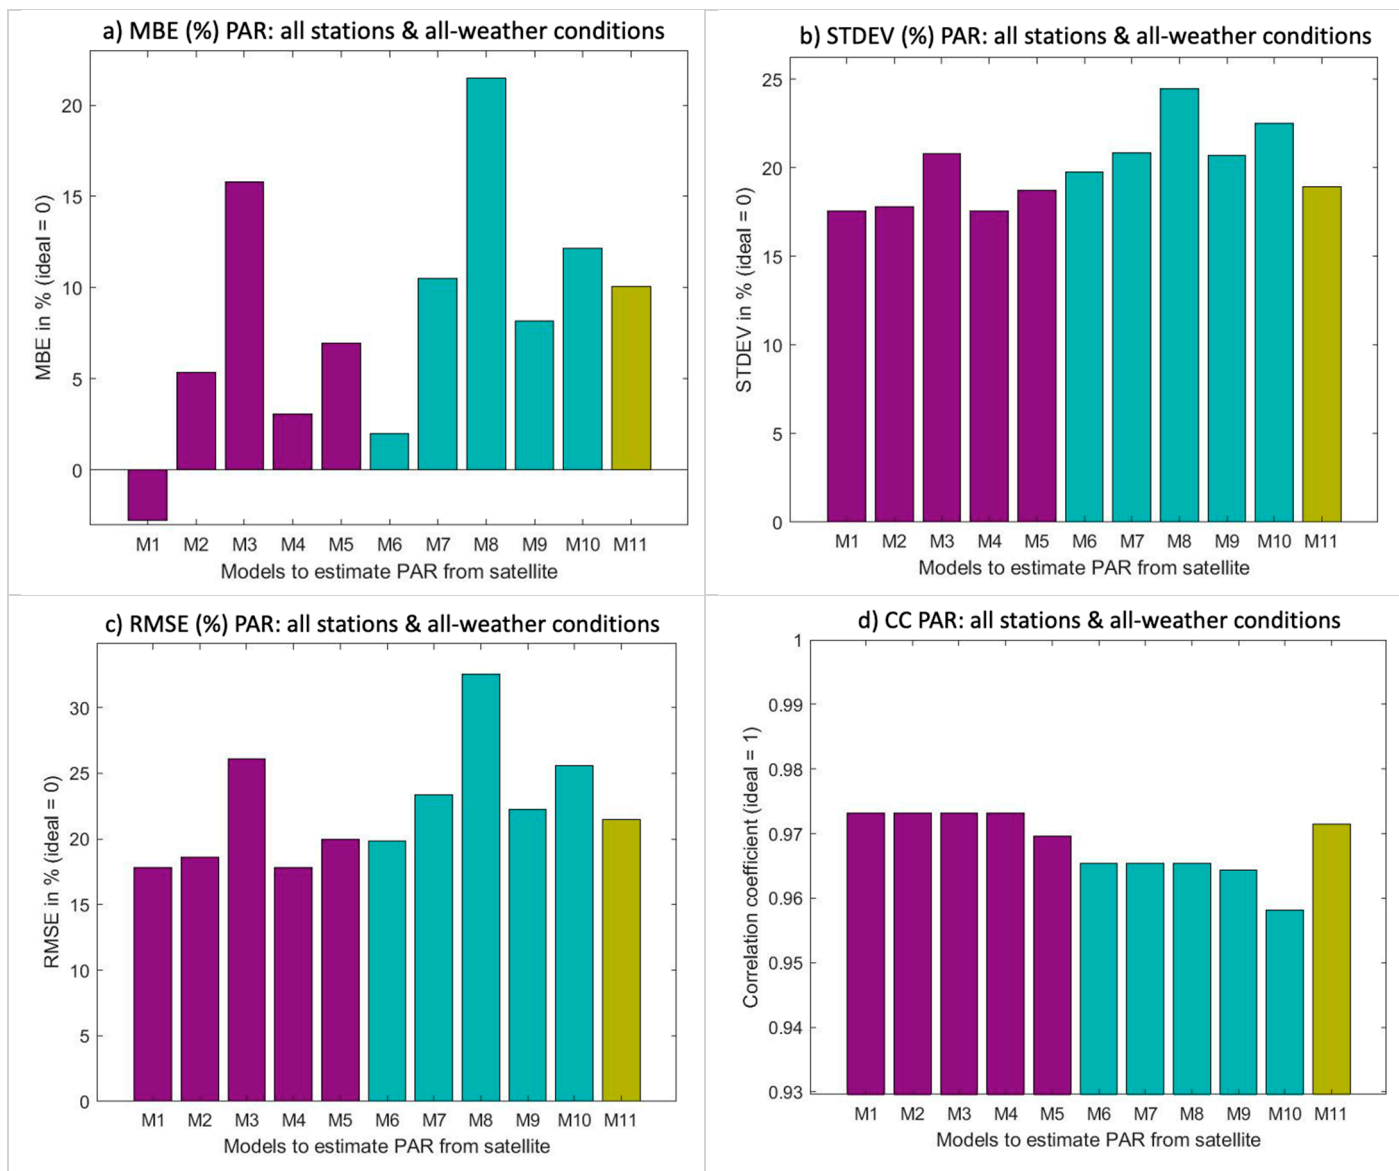

Figure S11: Validation results for group 11 composed of a single station of EFDC\_ZA-Kru in the Kruger Park nearby the city of Skukuza and for each method. a) MBE (%); b) STDEV (%); c) RMSE (%); d) CC. The 3 colors depict the SSIs from which methods are computed: from HC3 in purple, from CAMS-Rad in turquoise, and from SARAH-3 in kaki. Methods are M1: *Jacovides* from HC3, M2: *Udo et Aro* from HC3, M3: *Szeicz* from HC3, M4: *Weighted\_Kato* with BB CMF from HC3, M5: *Weighted\_Kato* with PAR CMF from HC3, M6: *Jacovides* from CAMS-Rad, M7: *Udo et Aro* from CAMS-Rad, M8: *Szeicz* from CAMS-Rad, M9: *Weighted\_Kato* with BB CMF from CAMS-Rad, M10: *Weighted\_Kato* with PAR CMF from CAMS-Rad, and M11: DWD SARAH-3



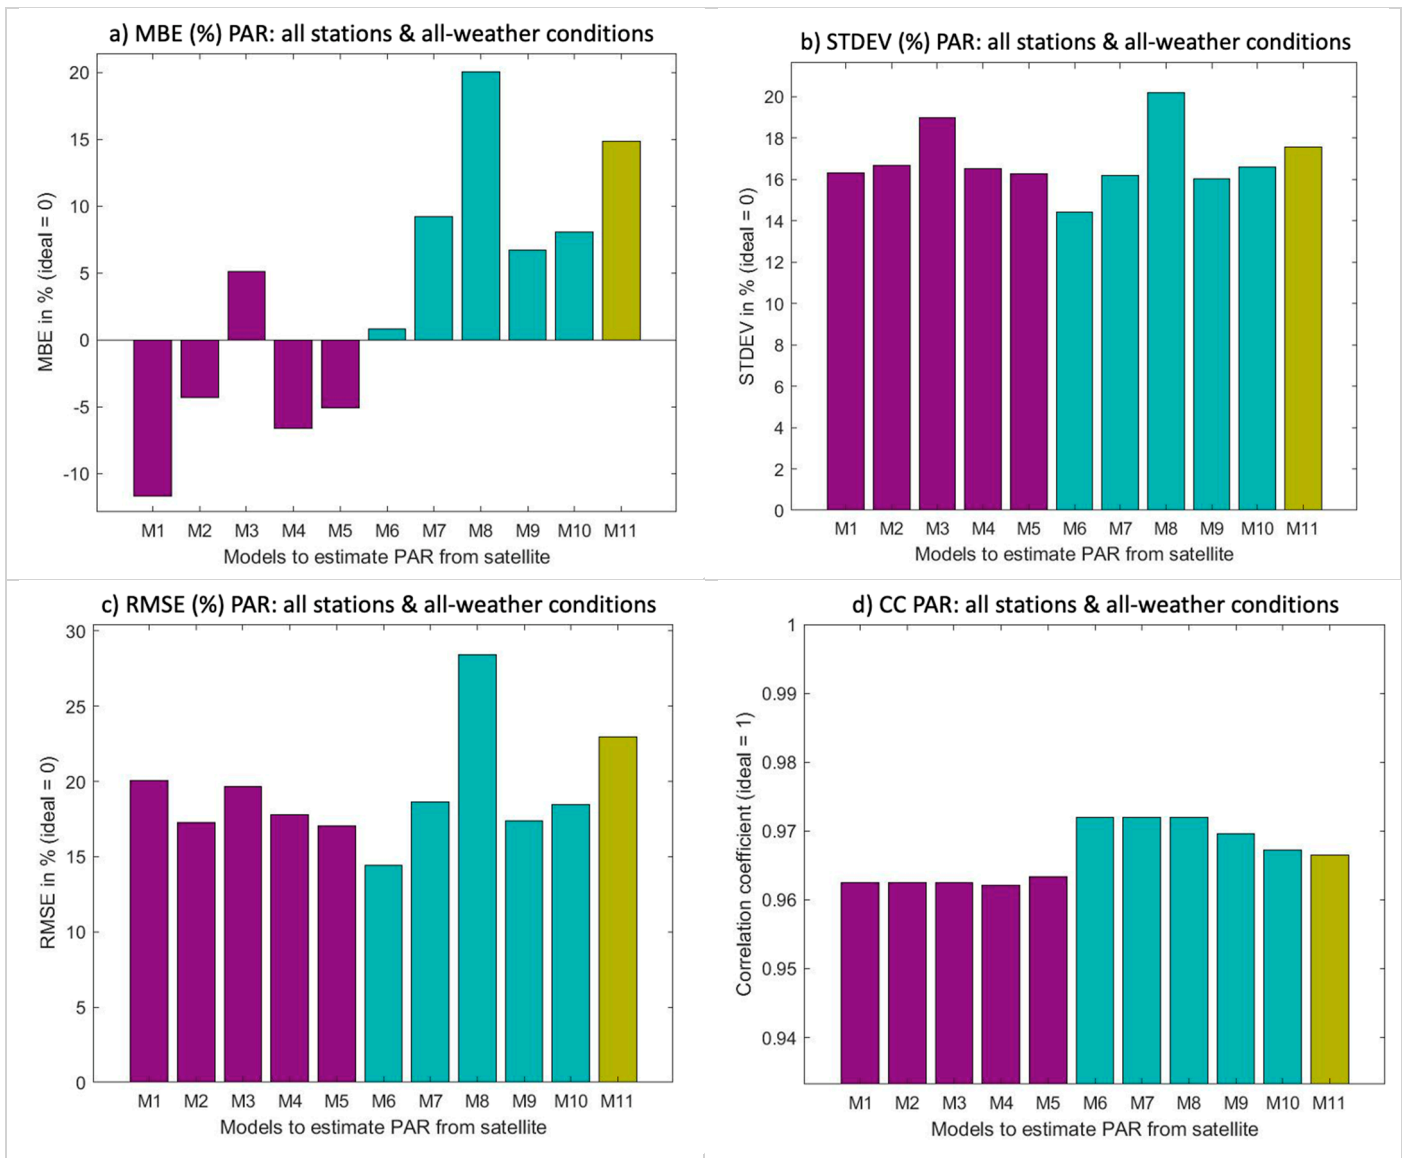

Figure S12: Validation results for Senegal composed of a single station of EFDC\_SN-Dhr close to the city of Dahra and for each method. a) MBE (%); b) STDEV (%); c) RMSE (%); d) CC. The 3 colors depict the SSIs from which methods are computed: from HC3 in purple, from CAMS-Rad in turquoise, and from SARAH-3 in kaki. Methods are M1: Jacovides from HC3, M2: Udo et Aro from HC3, M3: Szeicz from HC3, M4: Weighted\_Kato with BB CMF from HC3, M5: Weighted\_Kato with PAR CMF from HC3, M6: Jacovides from CAMS-Rad, M7: Udo et Aro from CAMS-Rad, M8: Szeicz from CAMS-Rad, M9: Weighted\_Kato with BB CMF from CAMS-Rad, M10: Weighted\_Kato with PAR CMF from CAMS-Rad, and M11: DWD SARAH-3



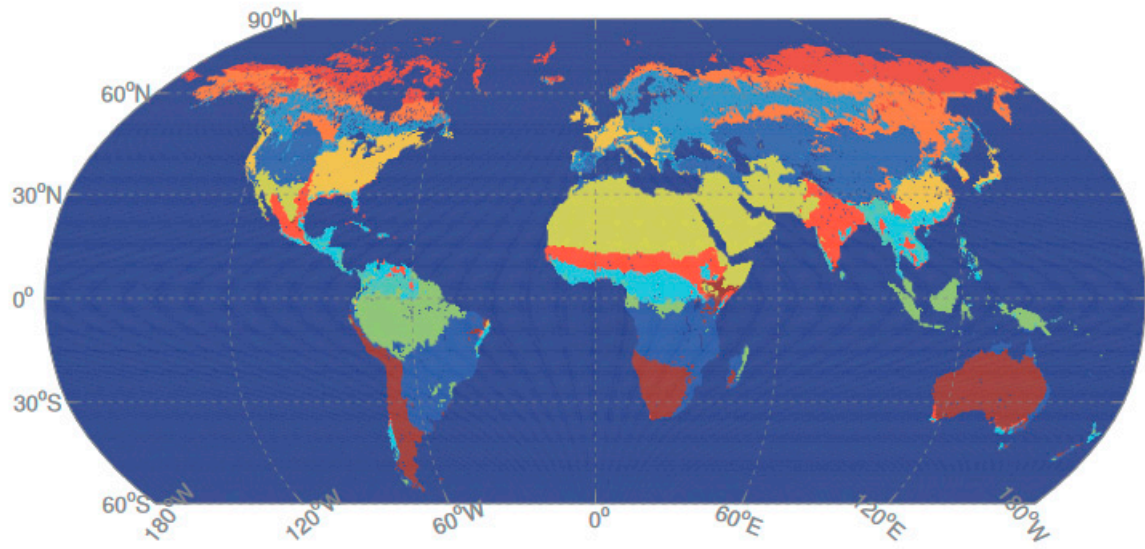

---

*Figure S13: Map of k-means clustering with  $k=12$  based on the variables Precipitation, Temperature, Downward Shortwave Radiation, Enhanced Vegetation Index, and Fraction of Absorbed Photosynthetically Active Radiation (Zscheischler et al. 2012).*

---

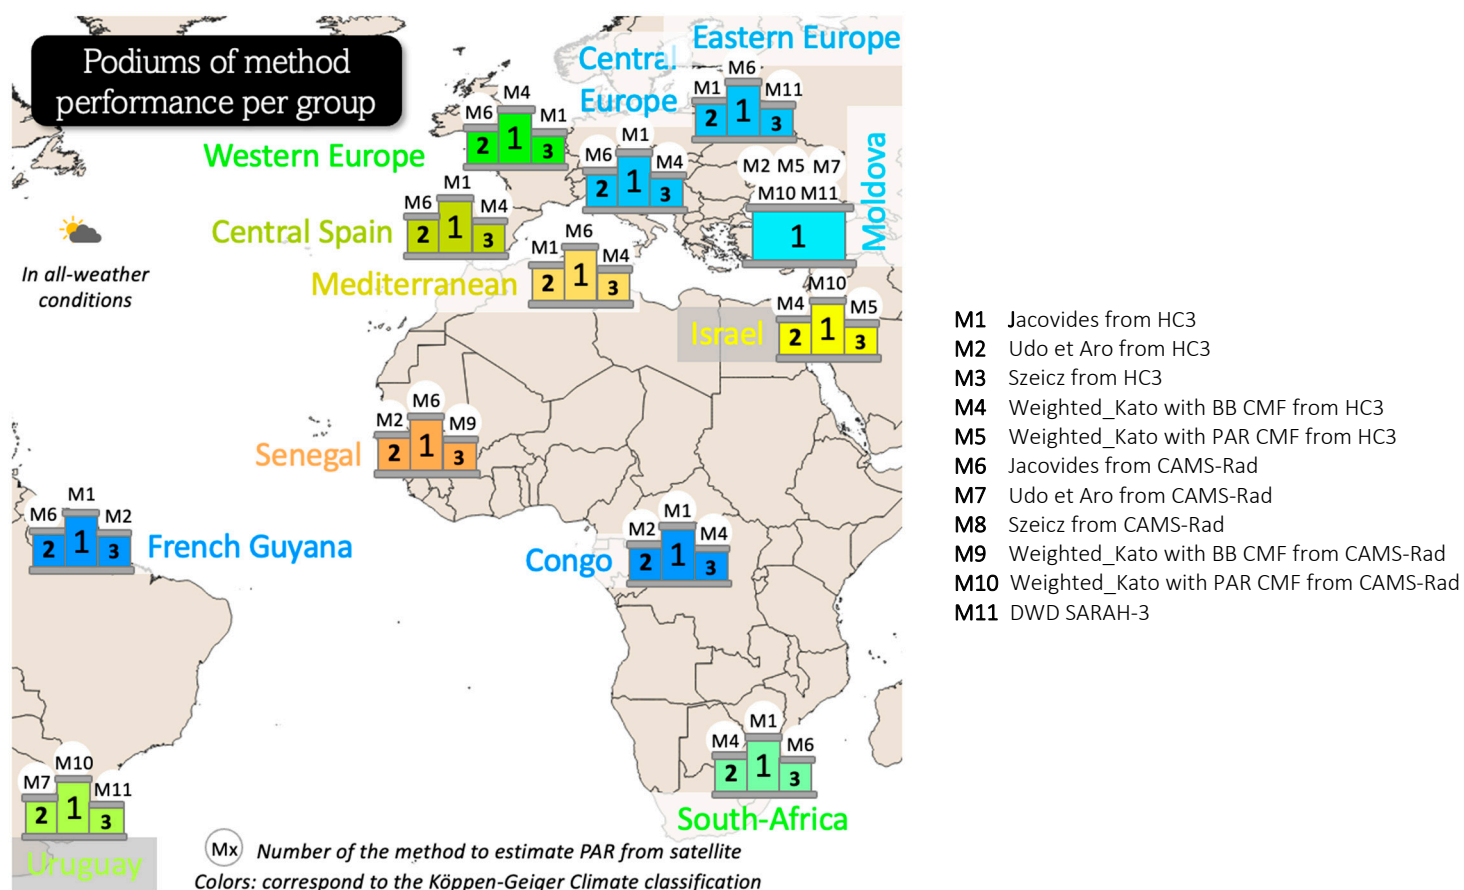

Figure S14: Map with the podiums of method performance per group

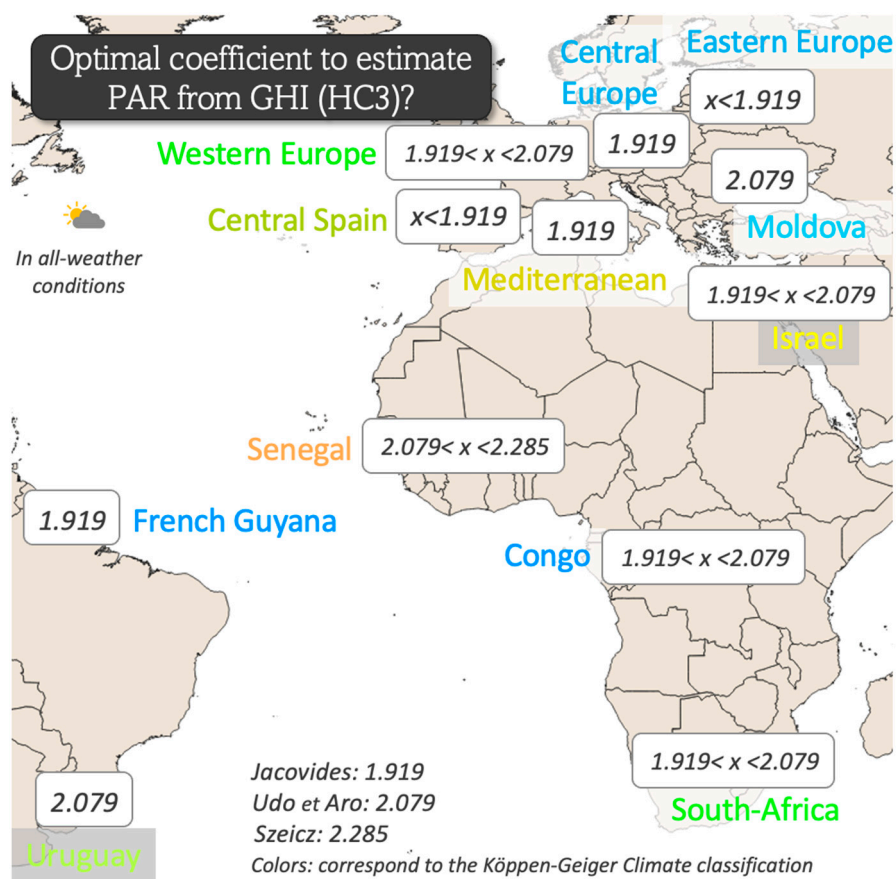

Figure S15: Map with the optimal coefficients to estimate PAR from GHI per group in the geographical coverage of MSG prime.

| # Quality assessment of 11 methods to derive 30-min PAR [400-700] nm from satellite imagery in <b>all-weather</b> conditions |                                                                                                                      |                        |                        |                        |                        |                        |                        |                        |                        |                        |                        |
|------------------------------------------------------------------------------------------------------------------------------|----------------------------------------------------------------------------------------------------------------------|------------------------|------------------------|------------------------|------------------------|------------------------|------------------------|------------------------|------------------------|------------------------|------------------------|
| # Author                                                                                                                     | Dr Claire THOMAS – Date of generation of the validation results: June 2022                                           |                        |                        |                        |                        |                        |                        |                        |                        |                        |                        |
| # Method 1 (M1)                                                                                                              | Jacovides (2004) from HC3 (coeff 1.919)                                                                              |                        |                        |                        |                        |                        |                        |                        |                        |                        |                        |
| # Method 2 (M2)                                                                                                              | Udo et Aro (1999) from HC3 (coeff 2.079)                                                                             |                        |                        |                        |                        |                        |                        |                        |                        |                        |                        |
| # Method 3 (M3)                                                                                                              | Szeicz (1974) from HC3 (coeff 2.285)                                                                                 |                        |                        |                        |                        |                        |                        |                        |                        |                        |                        |
| # Method 4 (M4)                                                                                                              | Weighted Kato with BB CMF from HC3                                                                                   |                        |                        |                        |                        |                        |                        |                        |                        |                        |                        |
| # Method 5 (M5)                                                                                                              | Weighted Kato with PAR CMF from HC3                                                                                  |                        |                        |                        |                        |                        |                        |                        |                        |                        |                        |
| # Method 6 (M6)                                                                                                              | Jacovides (2004) from CAMS-Rad (coeff 1.919)                                                                         |                        |                        |                        |                        |                        |                        |                        |                        |                        |                        |
| # Method 7 (M7)                                                                                                              | Udo et Aro (1999) from CAMS-Rad (coeff 2.079)                                                                        |                        |                        |                        |                        |                        |                        |                        |                        |                        |                        |
| # Method 8 (M8)                                                                                                              | Szeicz (1974) from CAMS-Rad (coeff 2.285)                                                                            |                        |                        |                        |                        |                        |                        |                        |                        |                        |                        |
| # Method 9 (M9)                                                                                                              | Weighted Kato with BB CMF from CAMS-Rad                                                                              |                        |                        |                        |                        |                        |                        |                        |                        |                        |                        |
| # Method 10 (M10)                                                                                                            | Weighted Kato with PAR CMF from CAMS-Rad                                                                             |                        |                        |                        |                        |                        |                        |                        |                        |                        |                        |
| # Method 11 (M11)                                                                                                            | DWD SARA3H-3                                                                                                         |                        |                        |                        |                        |                        |                        |                        |                        |                        |                        |
| # MBE                                                                                                                        | Bias in $\mu\text{mol}/\text{m}^2/\text{s}$ (relative bias in percent) - ideal 0                                     |                        |                        |                        |                        |                        |                        |                        |                        |                        |                        |
| # STD                                                                                                                        | STandard Deviation in $\mu\text{mol}/\text{m}^2/\text{s}$ (relative standard deviation in percent) - ideal 0         |                        |                        |                        |                        |                        |                        |                        |                        |                        |                        |
| # RMSE                                                                                                                       | Root Mean Square Error in $\mu\text{mol}/\text{m}^2/\text{s}$ (relative Root Mean Square Error in percent) - ideal 0 |                        |                        |                        |                        |                        |                        |                        |                        |                        |                        |
| # CC                                                                                                                         | Correlation Coefficient - ideal 1                                                                                    |                        |                        |                        |                        |                        |                        |                        |                        |                        |                        |
| # Station                                                                                                                    | M1                                                                                                                   | M2                     | M3                     | M4                     | M5                     | M6                     | M7                     | M8                     | M9                     | M10                    | M11                    |
| Aberystwyth_University                                                                                                       | MBE -23.6<br>(-5.1 %)                                                                                                | MBE 13.3<br>(2.9 %)    | MBE 60.7<br>(13.0 %)   | MBE -5.9<br>(-1.3 %)   | MBE 12.5<br>(2.7 %)    | MBE -20.5<br>(-4.4 %)  | MBE 16.6<br>(3.6 %)    | MBE 64.4<br>(13.8 %)   | MBE -2.5<br>(-0.5 %)   | MBE 18.7<br>(4.0 %)    | MBE -2.0<br>(-0.4 %)   |
| NBDATA: 49792                                                                                                                | STD 131.3<br>(28.2 %)                                                                                                | STD 129.9<br>(27.9 %)  | STD 140.8<br>(30.2 %)  | STD 130.0<br>(27.9 %)  | STD 133.0<br>(28.6 %)  | STD 139.5<br>(30.0 %)  | STD 135.6<br>(29.1 %)  | STD 142.1<br>(30.5 %)  | STD 138.3<br>(29.7 %)  | STD 145.6<br>(31.3 %)  | STD 154.6<br>(33.2 %)  |
| MEANREF: 465.4                                                                                                               | RMSE<br>133.4 (28.7 %)                                                                                               | RMSE<br>130.6 (28.1 %) | RMSE<br>153.3 (32.9 %) | RMSE<br>130.2 (28.0 %) | RMSE<br>133.5 (28.7 %) | RMSE<br>141.0 (30.3 %) | RMSE<br>136.6 (29.4 %) | RMSE<br>156.0 (33.5 %) | RMSE<br>138.3 (29.7 %) | RMSE<br>146.8 (31.5 %) | RMSE<br>154.6 (33.2 %) |
|                                                                                                                              | CC 0.957                                                                                                             | CC 0.957               | CC 0.957               | CC 0.957               | CC 0.955               | CC 0.953               | CC 0.953               | CC 0.953               | CC 0.952               | CC 0.946               | CC 0.940               |
| Abbotts_Hall                                                                                                                 | MBE -19.2<br>(-3.9 %)                                                                                                | MBE 19.7<br>(4.1 %)    | MBE 69.8<br>(14.4 %)   | MBE 0.7<br>(0.1 %)     | MBE 17.0<br>(3.5 %)    | MBE -1.6<br>(-0.3 %)   | MBE 38.7<br>(8.0 %)    | MBE 90.7<br>(18.7 %)   | MBE 18.9<br>(3.9 %)    | MBE 38.9<br>(8.0 %)    | MBE 45.3<br>(9.3 %)    |
| NBDATA: 15319                                                                                                                | STD 136.4<br>(28.1 %)                                                                                                | STD 143.7<br>(29.6 %)  | STD 163.4<br>(33.6 %)  | STD 141.5<br>(29.1 %)  | STD 139.7<br>(28.8 %)  | STD 135.7<br>(27.9 %)  | STD 139.6<br>(28.7 %)  | STD 155.2<br>(31.9 %)  | STD 139.3<br>(28.7 %)  | STD 144.9<br>(29.8 %)  | STD 154.0<br>(31.7 %)  |

|                |                           |                           |                           |                           |                           |                           |                           |                           |                           |                           |                           |
|----------------|---------------------------|---------------------------|---------------------------|---------------------------|---------------------------|---------------------------|---------------------------|---------------------------|---------------------------|---------------------------|---------------------------|
| MEANREF: 485.8 | RMSE<br>137.8 (28.4<br>%) | RMSE<br>145.1 (29.9<br>%) | RMSE<br>177.7 (36.6<br>%) | RMSE<br>141.5 (29.1<br>%) | RMSE<br>140.7 (29.0<br>%) | RMSE<br>135.7 (27.9<br>%) | RMSE<br>144.9 (29.8<br>%) | RMSE<br>179.7 (37.0<br>%) | RMSE<br>140.5 (28.9<br>%) | RMSE<br>150.0 (30.9<br>%) | RMSE<br>160.5 (33.0<br>%) |
|                | CC 0.946                  | CC 0.946                  | CC 0.946                  | CC 0.945                  | CC 0.946                  | CC 0.946                  | CC 0.946                  | CC 0.946                  | CC 0.944                  | CC 0.941                  | CC 0.934                  |
| Albacete       | MBE 19.3<br>(2.4 %)       | MBE 87.9<br>(10.9 %)      | MBE 176.3<br>(21.9 %)     | MBE 49.0<br>(6.1 %)       | MBE 69.0<br>(8.6 %)       | MBE 13.5<br>(1.7 %)       | MBE 81.7<br>(10.2 %)      | MBE 169.4<br>(21.1 %)     | MBE 42.9<br>(5.3 %)       | MBE 61.4<br>(7.6 %)       | MBE 82.9<br>(10.3 %)      |
| NBDATA: 13612  | STD 169.4<br>(21.1 %)     | STD 176.3<br>(21.9 %)     | STD 201.0<br>(25.0 %)     | STD 172.9<br>(21.5 %)     | STD 183.8<br>(22.9 %)     | STD 154.3<br>(19.2 %)     | STD 163.0<br>(20.3 %)     | STD 191.1<br>(23.8 %)     | STD 158.9<br>(19.8 %)     | STD 168.0<br>(20.9 %)     | STD 174.0<br>(21.6 %)     |
| MEANREF: 804.1 | RMSE<br>170.5 (21.2<br>%) | RMSE<br>197.0 (24.5<br>%) | RMSE<br>267.4 (33.2<br>%) | RMSE<br>179.7 (22.3<br>%) | RMSE<br>196.3 (24.4<br>%) | RMSE<br>154.9 (19.3<br>%) | RMSE<br>182.3 (22.7<br>%) | RMSE<br>255.4 (31.8<br>%) | RMSE<br>164.6 (20.5<br>%) | RMSE<br>178.9 (22.2<br>%) | RMSE<br>192.7 (24.0<br>%) |
|                | CC 0.955                  | CC 0.955                  | CC 0.955                  | CC 0.955                  | CC 0.949                  | CC 0.963                  | CC 0.963                  | CC 0.963                  | CC 0.962                  | CC 0.959                  | CC 0.955                  |
| Cordoba        | MBE 3.7<br>(0.4 %)        | MBE 75.2<br>(8.8 %)       | MBE 167.2<br>(19.6 %)     | MBE 41.6<br>(4.9 %)       | MBE 57.7<br>(6.8 %)       | MBE -9.7<br>(-1.1 %)      | MBE 60.6<br>(7.1 %)       | MBE 151.2<br>(17.7 %)     | MBE 27.4<br>(3.2 %)       | MBE 43.8<br>(5.1 %)       | MBE 64.2<br>(7.5 %)       |
| NBDATA: 13598  | STD 105.3<br>(12.3 %)     | STD 114.8<br>(13.4 %)     | STD 149.6<br>(17.5 %)     | STD 110.2<br>(12.9 %)     | STD 118.1<br>(13.8 %)     | STD 105.4<br>(12.3 %)     | STD 114.7<br>(13.4 %)     | STD 149.6<br>(17.5 %)     | STD 109.4<br>(12.8 %)     | STD 116.1<br>(13.6 %)     | STD 107.6<br>(12.6 %)     |
| MEANREF: 853.5 | RMSE<br>105.4 (12.3<br>%) | RMSE<br>137.2 (16.1<br>%) | RMSE<br>224.4 (26.3<br>%) | RMSE<br>117.8 (13.8<br>%) | RMSE<br>131.4 (15.4<br>%) | RMSE<br>105.8 (12.4<br>%) | RMSE<br>129.8 (15.2<br>%) | RMSE<br>212.7 (24.9<br>%) | RMSE<br>112.8 (13.2<br>%) | RMSE<br>124.1 (14.5<br>%) | RMSE<br>125.3 (14.7<br>%) |
|                | CC 0.983                  | CC 0.983                  | CC 0.983                  | CC 0.983                  | CC 0.980                  | CC 0.983                  | CC 0.983                  | CC 0.983                  | CC 0.983                  | CC 0.981                  | CC 0.983                  |
| Czech_BKF_SF   | MBE 44.8<br>(9.1 %)       | MBE 89.7<br>(18.1 %)      | MBE 147.6<br>(29.9 %)     | MBE 59.9<br>(12.1 %)      | MBE 79.4<br>(16.1 %)      | MBE 49.1<br>(9.9 %)       | MBE 94.4<br>(19.1 %)      | MBE 152.8<br>(30.9 %)     | MBE 64.3<br>(13.0 %)      | MBE 89.1<br>(18.0 %)      | MBE 48.8<br>(9.9 %)       |
| NBDATA: 97261  | STD 161.3<br>(32.6 %)     | STD 176.4<br>(35.7 %)     | STD 206.0<br>(41.6 %)     | STD 168.1<br>(34.0 %)     | STD 169.9<br>(34.4 %)     | STD 159.3<br>(32.2 %)     | STD 166.9<br>(33.8 %)     | STD 187.7<br>(37.9 %)     | STD 163.4<br>(33.0 %)     | STD 171.9<br>(34.8 %)     | STD 152.8<br>(30.9 %)     |
| MEANREF: 494.5 | RMSE<br>167.4 (33.8<br>%) | RMSE<br>197.9 (40.0<br>%) | RMSE<br>253.4 (51.2<br>%) | RMSE<br>178.5 (36.1<br>%) | RMSE<br>187.5 (37.9<br>%) | RMSE<br>166.7 (33.7<br>%) | RMSE<br>191.8 (38.8<br>%) | RMSE<br>242.0 (48.9<br>%) | RMSE<br>175.6 (35.5<br>%) | RMSE<br>193.6 (39.1<br>%) | RMSE<br>160.4 (32.4<br>%) |
|                | CC 0.942                  | CC 0.942                  | CC 0.942                  | CC 0.942                  | CC 0.940                  | CC 0.940                  | CC 0.940                  | CC 0.940                  | CC 0.939                  | CC 0.933                  | CC 0.946                  |
| Czech_BKF_ST   | MBE 55.0<br>(11.7 %)      | MBE 99.0<br>(21.0 %)      | MBE 155.6<br>(33.0 %)     | MBE 68.7<br>(14.6 %)      | MBE 88.9<br>(18.8 %)      | MBE 53.7<br>(11.4 %)      | MBE 97.5<br>(20.7 %)      | MBE 154.0<br>(32.6 %)     | MBE 67.4<br>(14.3 %)      | MBE 91.7<br>(19.4 %)      | MBE 57.2<br>(12.1 %)      |
| NBDATA: 107261 | STD 155.2<br>(32.9 %)     | STD 169.2<br>(35.8 %)     | STD 197.5<br>(41.8 %)     | STD 161.7<br>(34.2 %)     | STD 163.1<br>(34.6 %)     | STD 153.3<br>(32.5 %)     | STD 160.6<br>(34.0 %)     | STD 181.0<br>(38.3 %)     | STD 157.3<br>(33.3 %)     | STD 164.9<br>(34.9 %)     | STD 147.4<br>(31.2 %)     |
| MEANREF: 472.1 | RMSE<br>164.7 (34.9<br>%) | RMSE<br>196.1 (41.5<br>%) | RMSE<br>251.4 (53.3<br>%) | RMSE<br>175.7 (37.2<br>%) | RMSE<br>185.8 (39.3<br>%) | RMSE<br>162.4 (34.4<br>%) | RMSE<br>187.9 (39.8<br>%) | RMSE<br>237.6 (50.3<br>%) | RMSE<br>171.1 (36.2<br>%) | RMSE<br>188.7 (40.0<br>%) | RMSE<br>158.1 (33.5<br>%) |

|                |                           |                           |                           |                           |                           |                           |                           |                           |                           |                           |                           |
|----------------|---------------------------|---------------------------|---------------------------|---------------------------|---------------------------|---------------------------|---------------------------|---------------------------|---------------------------|---------------------------|---------------------------|
|                | CC 0.944                  | CC 0.944                  | CC 0.944                  | CC 0.943                  | CC 0.942                  | CC 0.942                  | CC 0.942                  | CC 0.942                  | CC 0.941                  | CC 0.936                  | CC 0.947                  |
| Czech_BKG      | MBE 55.2<br>(11.0 %)      | MBE 101.6<br>(20.3 %)     | MBE 161.3<br>(32.2 %)     | MBE 70.7<br>(14.1 %)      | MBE 90.0<br>(18.0 %)      | MBE 55.3<br>(11.0 %)      | MBE 101.7<br>(20.3 %)     | MBE 161.4<br>(32.2 %)     | MBE 70.9<br>(14.1 %)      | MBE 96.4<br>(19.2 %)      | MBE 62.4<br>(12.4 %)      |
| NBDATA: 95409  | STD 179.8<br>(35.9 %)     | STD 195.2<br>(38.9 %)     | STD 224.3<br>(44.7 %)     | STD 186.7<br>(37.2 %)     | STD 185.7<br>(37.0 %)     | STD 167.0<br>(33.3 %)     | STD 174.9<br>(34.9 %)     | STD 195.5<br>(39.0 %)     | STD 171.1<br>(34.1 %)     | STD 177.5<br>(35.4 %)     | STD 163.5<br>(32.6 %)     |
| MEANREF: 501.3 | RMSE<br>188.1 (37.5<br>%) | RMSE<br>220.0 (43.9<br>%) | RMSE<br>276.3 (55.1<br>%) | RMSE<br>199.6 (39.8<br>%) | RMSE<br>206.4 (41.2<br>%) | RMSE<br>175.9 (35.1<br>%) | RMSE<br>202.3 (40.4<br>%) | RMSE<br>253.6 (50.6<br>%) | RMSE<br>185.2 (36.9<br>%) | RMSE<br>202.0 (40.3<br>%) | RMSE<br>175.0 (34.9<br>%) |
|                | CC 0.929                  | CC 0.929                  | CC 0.929                  | CC 0.928                  | CC 0.928                  | CC 0.934                  | CC 0.934                  | CC 0.934                  | CC 0.933                  | CC 0.929                  | CC 0.938                  |
| Czech_KRP      | MBE -0.3<br>(-0.1 %)      | MBE 43.3<br>(8.3 %)       | MBE 99.6<br>(19.0 %)      | MBE 14.7<br>(2.8 %)       | MBE 35.2<br>(6.7 %)       | MBE 17.4<br>(3.3 %)       | MBE 62.5<br>(11.9 %)      | MBE 120.7<br>(23.0 %)     | MBE 32.7<br>(6.2 %)       | MBE 55.9<br>(10.7 %)      | MBE 44.6<br>(8.5 %)       |
| NBDATA: 67624  | STD 139.0<br>(26.5 %)     | STD 146.8<br>(28.0 %)     | STD 169.0<br>(32.2 %)     | STD 141.7<br>(27.0 %)     | STD 141.3<br>(27.0 %)     | STD 131.7<br>(25.1 %)     | STD 138.4<br>(26.4 %)     | STD 159.9<br>(30.5 %)     | STD 134.5<br>(25.7 %)     | STD 140.3<br>(26.8 %)     | STD 136.0<br>(25.9 %)     |
| MEANREF: 524.3 | RMSE<br>139.0 (26.5<br>%) | RMSE<br>153.1 (29.2<br>%) | RMSE<br>196.1 (37.4<br>%) | RMSE<br>142.5 (27.2<br>%) | RMSE<br>145.6 (27.8<br>%) | RMSE<br>132.8 (25.3<br>%) | RMSE<br>151.9 (29.0<br>%) | RMSE<br>200.3 (38.2<br>%) | RMSE<br>138.4 (26.4<br>%) | RMSE<br>151.0 (28.8<br>%) | RMSE<br>143.1 (27.3<br>%) |
|                | CC 0.953                  | CC 0.953                  | CC 0.953                  | CC 0.954                  | CC 0.954                  | CC 0.958                  | CC 0.958                  | CC 0.958                  | CC 0.958                  | CC 0.955                  | CC 0.958                  |
| Czech_LNZ      | MBE -5.0<br>(-0.9 %)      | MBE 40.9<br>(7.4 %)       | MBE 99.9<br>(18.0 %)      | MBE 14.6<br>(2.6 %)       | MBE 29.7<br>(5.3 %)       | MBE 15.8<br>(2.8 %)       | MBE 63.3<br>(11.4 %)      | MBE 124.6<br>(22.5 %)     | MBE 36.0<br>(6.5 %)       | MBE 56.0<br>(10.1 %)      | MBE 54.3<br>(9.8 %)       |
| NBDATA: 53200  | STD 126.6<br>(22.8 %)     | STD 139.7<br>(25.2 %)     | STD 169.7<br>(30.6 %)     | STD 131.8<br>(23.7 %)     | STD 129.3<br>(23.3 %)     | STD 116.6<br>(21.0 %)     | STD 125.0<br>(22.5 %)     | STD 150.9<br>(27.2 %)     | STD 120.1<br>(21.6 %)     | STD 125.9<br>(22.7 %)     | STD 115.0<br>(20.7 %)     |
| MEANREF: 555.1 | RMSE<br>126.7 (22.8<br>%) | RMSE<br>145.6 (26.2<br>%) | RMSE<br>196.9 (35.5<br>%) | RMSE<br>132.6 (23.9<br>%) | RMSE<br>132.7 (23.9<br>%) | RMSE<br>117.6 (21.2<br>%) | RMSE<br>140.1 (25.2<br>%) | RMSE<br>195.7 (35.3<br>%) | RMSE<br>125.3 (22.6<br>%) | RMSE<br>137.8 (24.8<br>%) | RMSE<br>127.2 (22.9<br>%) |
|                | CC 0.965                  | CC 0.965                  | CC 0.965                  | CC 0.966                  | CC 0.967                  | CC 0.970                  | CC 0.970                  | CC 0.970                  | CC 0.970                  | CC 0.968                  | CC 0.973                  |
| Czech_RAJ      | MBE 14.3<br>(2.7 %)       | MBE 60.2<br>(11.2 %)      | MBE 119.3<br>(22.2 %)     | MBE 31.2<br>(5.8 %)       | MBE 47.2<br>(8.8 %)       | MBE 20.7<br>(3.9 %)       | MBE 67.2<br>(12.5 %)      | MBE 127.0<br>(23.7 %)     | MBE 37.8<br>(7.0 %)       | MBE 60.6<br>(11.3 %)      | MBE 45.3<br>(8.4 %)       |
| NBDATA: 78864  | STD 151.6<br>(28.3 %)     | STD 163.2<br>(30.4 %)     | STD 189.8<br>(35.4 %)     | STD 156.5<br>(29.2 %)     | STD 155.3<br>(28.9 %)     | STD 144.6<br>(27.0 %)     | STD 149.7<br>(27.9 %)     | STD 169.0<br>(31.5 %)     | STD 146.9<br>(27.4 %)     | STD 153.1<br>(28.6 %)     | STD 156.9<br>(29.3 %)     |
| MEANREF: 536.3 | RMSE<br>152.3 (28.4<br>%) | RMSE<br>173.9 (32.4<br>%) | RMSE<br>224.1 (41.8<br>%) | RMSE<br>159.6 (29.8<br>%) | RMSE<br>162.3 (30.3<br>%) | RMSE<br>146.1 (27.2<br>%) | RMSE<br>164.1 (30.6<br>%) | RMSE<br>211.4 (39.4<br>%) | RMSE<br>151.7 (28.3<br>%) | RMSE<br>164.7 (30.7<br>%) | RMSE<br>163.3 (30.5<br>%) |
|                | CC 0.950                  | CC 0.953                  | CC 0.953                  | CC 0.953                  | CC 0.953                  | CC 0.949                  | CC 0.946                  |
| Czech_STI      | MBE 0.5<br>(0.1 %)        | MBE 45.4<br>(8.4 %)       | MBE 103.3<br>(19.2 %)     | MBE 17.0<br>(3.2 %)       | MBE 33.5<br>(6.2 %)       | MBE 21.9<br>(4.1 %)       | MBE 68.7<br>(12.7 %)      | MBE 128.9<br>(23.9 %)     | MBE 39.0<br>(7.2 %)       | MBE 61.0<br>(11.3 %)      | MBE 52.0<br>(9.7 %)       |

|                |                           |                           |                           |                           |                           |                           |                           |                           |                           |                           |                           |
|----------------|---------------------------|---------------------------|---------------------------|---------------------------|---------------------------|---------------------------|---------------------------|---------------------------|---------------------------|---------------------------|---------------------------|
| NBDATA: 98898  | STD 149.3<br>(27.7 %)     | STD 161.5<br>(30.0 %)     | STD 189.0<br>(35.1 %)     | STD 154.4<br>(28.7 %)     | STD 153.9<br>(28.6 %)     | STD 144.2<br>(26.8 %)     | STD 151.4<br>(28.1 %)     | STD 173.6<br>(32.2 %)     | STD 147.9<br>(27.4 %)     | STD 155.5<br>(28.9 %)     | STD 170.3<br>(31.6 %)     |
| MEANREF: 539.0 | RMSE<br>149.3 (27.7<br>%) | RMSE<br>167.7 (31.1<br>%) | RMSE<br>215.4 (40.0<br>%) | RMSE<br>155.4 (28.8<br>%) | RMSE<br>157.5 (29.2<br>%) | RMSE<br>145.8 (27.1<br>%) | RMSE<br>166.3 (30.8<br>%) | RMSE<br>216.2 (40.1<br>%) | RMSE<br>153.0 (28.4<br>%) | RMSE<br>167.1 (31.0<br>%) | RMSE<br>178.1 (33.0<br>%) |
|                | CC 0.952                  | CC 0.954                  | CC 0.954                  | CC 0.954                  | CC 0.954                  | CC 0.949                  | CC 0.939                  |
| Czech_TRE      | MBE -2.2<br>(-0.4 %)      | MBE 42.2<br>(7.9 %)       | MBE 99.3<br>(18.6 %)      | MBE 14.6<br>(2.7 %)       | MBE 33.4<br>(6.2 %)       | MBE 13.2<br>(2.5 %)       | MBE 58.9<br>(11.0 %)      | MBE 117.7<br>(22.0 %)     | MBE 30.4<br>(5.7 %)       | MBE 53.1<br>(9.9 %)       | MBE 38.7<br>(7.2 %)       |
| NBDATA: 122815 | STD 135.2<br>(25.3 %)     | STD 145.4<br>(27.2 %)     | STD 171.3<br>(32.1 %)     | STD 138.9<br>(26.0 %)     | STD 137.6<br>(25.7 %)     | STD 133.7<br>(25.0 %)     | STD 139.0<br>(26.0 %)     | STD 159.4<br>(29.8 %)     | STD 135.4<br>(25.3 %)     | STD 141.1<br>(26.4 %)     | STD 143.7<br>(26.9 %)     |
| MEANREF: 534.3 | RMSE<br>135.2 (25.3<br>%) | RMSE<br>151.4 (28.3<br>%) | RMSE<br>198.0 (37.1<br>%) | RMSE<br>139.7 (26.1<br>%) | RMSE<br>141.6 (26.5<br>%) | RMSE<br>134.3 (25.1<br>%) | RMSE<br>151.0 (28.3<br>%) | RMSE<br>198.1 (37.1<br>%) | RMSE<br>138.7 (26.0<br>%) | RMSE<br>150.7 (28.2<br>%) | RMSE<br>148.8 (27.8<br>%) |
|                | CC 0.959                  | CC 0.959                  | CC 0.959                  | CC 0.959                  | CC 0.960                  | CC 0.959                  | CC 0.959                  | CC 0.959                  | CC 0.959                  | CC 0.956                  | CC 0.954                  |
| EFDC_DE-Hai    | MBE -18.4<br>(-3.3 %)     | MBE 27.1<br>(4.8 %)       | MBE 85.8<br>(15.2 %)      | MBE -1.4<br>(-0.3 %)      | MBE 17.8<br>(3.2 %)       | MBE 5.9<br>(1.1 %)        | MBE 53.5<br>(9.5 %)       | MBE 114.8<br>(20.3 %)     | MBE 23.9<br>(4.2 %)       | MBE 48.5<br>(8.6 %)       | MBE 41.8<br>(7.4 %)       |
| NBDATA: 119559 | STD 164.9<br>(29.2 %)     | STD 171.1<br>(30.3 %)     | STD 190.4<br>(33.7 %)     | STD 165.6<br>(29.3 %)     | STD 163.7<br>(29.0 %)     | STD 151.3<br>(26.8 %)     | STD 153.9<br>(27.2 %)     | STD 169.7<br>(30.0 %)     | STD 151.4<br>(26.8 %)     | STD 156.7<br>(27.7 %)     | STD 158.9<br>(28.1 %)     |
| MEANREF: 564.9 | RMSE<br>165.9 (29.4<br>%) | RMSE<br>173.2 (30.7<br>%) | RMSE<br>208.9 (37.0<br>%) | RMSE<br>165.6 (29.3<br>%) | RMSE<br>164.7 (29.1<br>%) | RMSE<br>151.4 (26.8<br>%) | RMSE<br>162.9 (28.8<br>%) | RMSE<br>204.9 (36.3<br>%) | RMSE<br>153.3 (27.1<br>%) | RMSE<br>164.0 (29.0<br>%) | RMSE<br>164.3 (29.1<br>%) |
|                | CC 0.940                  | CC 0.940                  | CC 0.940                  | CC 0.940                  | CC 0.942                  | CC 0.949                  | CC 0.949                  | CC 0.949                  | CC 0.949                  | CC 0.946                  | CC 0.945                  |
| EFDC_FR-Aur    | MBE -25.7<br>(-3.8 %)     | MBE 28.2<br>(4.2 %)       | MBE 97.7<br>(14.5 %)      | MBE 0.1<br>(0.0 %)        | MBE 22.7<br>(3.4 %)       | MBE -19.3<br>(-2.9 %)     | MBE 35.2<br>(5.2 %)       | MBE 105.4<br>(15.7 %)     | MBE 6.8<br>(1.0 %)        | MBE 29.9<br>(4.4 %)       | MBE 32.5<br>(4.8 %)       |
| NBDATA: 132908 | STD 135.7<br>(20.2 %)     | STD 132.7<br>(19.7 %)     | STD 147.0<br>(21.8 %)     | STD 132.3<br>(19.7 %)     | STD 134.9<br>(20.1 %)     | STD 144.6<br>(21.5 %)     | STD 142.6<br>(21.2 %)     | STD 157.1<br>(23.3 %)     | STD 142.1<br>(21.1 %)     | STD 149.5<br>(22.2 %)     | STD 155.3<br>(23.1 %)     |
| MEANREF: 672.7 | RMSE<br>138.1 (20.5<br>%) | RMSE<br>135.6 (20.2<br>%) | RMSE<br>176.5 (26.2<br>%) | RMSE<br>132.3 (19.7<br>%) | RMSE<br>136.8 (20.3<br>%) | RMSE<br>145.9 (21.7<br>%) | RMSE<br>146.9 (21.8<br>%) | RMSE<br>189.1 (28.1<br>%) | RMSE<br>142.2 (21.1<br>%) | RMSE<br>152.5 (22.7<br>%) | RMSE<br>158.7 (23.6<br>%) |
|                | CC 0.970                  | CC 0.970                  | CC 0.970                  | CC 0.970                  | CC 0.969                  | CC 0.965                  | CC 0.965                  | CC 0.965                  | CC 0.965                  | CC 0.961                  | CC 0.958                  |
| EFDC_FR-Pue    | MBE -14.3<br>(-2.0 %)     | MBE 44.6<br>(6.2 %)       | MBE 120.6<br>(16.7 %)     | MBE 11.7<br>(1.6 %)       | MBE 32.0<br>(4.4 %)       | MBE -12.8<br>(-1.8 %)     | MBE 46.3<br>(6.4 %)       | MBE 122.4<br>(17.0 %)     | MBE 13.2<br>(1.8 %)       | MBE 32.0<br>(4.4 %)       | MBE 28.6<br>(4.0 %)       |
| NBDATA: 114025 | STD 148.5<br>(20.6 %)     | STD 146.6<br>(20.3 %)     | STD 161.7<br>(22.4 %)     | STD 146.7<br>(20.3 %)     | STD 154.3<br>(21.4 %)     | STD 149.0<br>(20.6 %)     | STD 149.9<br>(20.8 %)     | STD 168.5<br>(23.3 %)     | STD 149.1<br>(20.7 %)     | STD 156.4<br>(21.7 %)     | STD 145.1<br>(20.1 %)     |

|                |                           |                           |                           |                           |                           |                           |                           |                           |                           |                           |                           |
|----------------|---------------------------|---------------------------|---------------------------|---------------------------|---------------------------|---------------------------|---------------------------|---------------------------|---------------------------|---------------------------|---------------------------|
| MEANREF: 721.9 | RMSE<br>149.2 (20.7<br>%) | RMSE<br>153.2 (21.2<br>%) | RMSE<br>201.7 (27.9<br>%) | RMSE<br>147.1 (20.4<br>%) | RMSE<br>157.6 (21.8<br>%) | RMSE<br>149.5 (20.7<br>%) | RMSE<br>156.9 (21.7<br>%) | RMSE<br>208.3 (28.9<br>%) | RMSE<br>149.7 (20.7<br>%) | RMSE<br>159.6 (22.1<br>%) | RMSE<br>147.9 (20.5<br>%) |
|                | CC 0.965                  | CC 0.965                  | CC 0.965                  | CC 0.965                  | CC 0.961                  | CC 0.964                  | CC 0.964                  | CC 0.964                  | CC 0.964                  | CC 0.960                  | CC 0.966                  |
| EFDC_GF-Guy    | MBE 1.5<br>(0.2 %)        | MBE 70.1<br>(8.5 %)       | MBE 158.3<br>(19.3 %)     | MBE 85.8<br>(10.5 %)      | MBE 114.5<br>(14.0 %)     | MBE 63.7<br>(7.8 %)       | MBE 137.5<br>(16.7 %)     | MBE 232.5<br>(28.3 %)     | MBE 154.6<br>(18.8 %)     | MBE 187.1<br>(22.8 %)     | MBE 170.5<br>(20.8 %)     |
| NBDATA: 65742  | STD 241.9<br>(29.5 %)     | STD 262.8<br>(32.0 %)     | STD 299.4<br>(36.5 %)     | STD 268.1<br>(32.7 %)     | STD 272.8<br>(33.2 %)     | STD 227.3<br>(27.7 %)     | STD 245.0<br>(29.8 %)     | STD 278.2<br>(33.9 %)     | STD 249.0<br>(30.3 %)     | STD 255.1<br>(31.1 %)     | STD 296.5<br>(36.1 %)     |
| MEANREF: 820.6 | RMSE<br>241.9 (29.5<br>%) | RMSE<br>272.0 (33.1<br>%) | RMSE<br>338.7 (41.3<br>%) | RMSE<br>281.5 (34.3<br>%) | RMSE<br>295.9 (36.1<br>%) | RMSE<br>236.0 (28.7<br>%) | RMSE<br>280.9 (34.2<br>%) | RMSE<br>362.6 (44.1<br>%) | RMSE<br>293.1 (35.7<br>%) | RMSE<br>316.4 (38.5<br>%) | RMSE<br>342.0 (41.6<br>%) |
|                | CC 0.911                  | CC 0.911                  | CC 0.911                  | CC 0.910                  | CC 0.909                  | CC 0.918                  | CC 0.918                  | CC 0.918                  | CC 0.918                  | CC 0.915                  | CC 0.893                  |
| EFDC_IE-Dri    | MBE 6.5<br>(1.4 %)        | MBE 44.7<br>(9.9 %)       | MBE 93.8<br>(20.8 %)      | MBE 21.1<br>(4.7 %)       | MBE 45.8<br>(10.1 %)      | MBE 26.0<br>(5.8 %)       | MBE 65.8<br>(14.6 %)      | MBE 117.1<br>(25.9 %)     | MBE 41.4<br>(9.2 %)       | MBE 66.7<br>(14.8 %)      | MBE 57.1<br>(12.6 %)      |
| NBDATA: 49985  | STD 152.7<br>(33.8 %)     | STD 157.2<br>(34.8 %)     | STD 172.4<br>(38.2 %)     | STD 154.4<br>(34.2 %)     | STD 160.9<br>(35.7 %)     | STD 161.7<br>(35.8 %)     | STD 167.8<br>(37.2 %)     | STD 184.5<br>(40.9 %)     | STD 165.6<br>(36.7 %)     | STD 174.8<br>(38.7 %)     | STD 176.0<br>(39.0 %)     |
| MEANREF: 451.2 | RMSE<br>152.8 (33.9<br>%) | RMSE<br>163.4 (36.2<br>%) | RMSE<br>196.2 (43.5<br>%) | RMSE<br>155.9 (34.5<br>%) | RMSE<br>167.3 (37.1<br>%) | RMSE<br>163.8 (36.3<br>%) | RMSE<br>180.3 (39.9<br>%) | RMSE<br>218.5 (48.4<br>%) | RMSE<br>170.7 (37.8<br>%) | RMSE<br>187.1 (41.4<br>%) | RMSE<br>185.0 (41.0<br>%) |
|                | CC 0.932                  | CC 0.932                  | CC 0.932                  | CC 0.931                  | CC 0.926                  | CC 0.923                  | CC 0.923                  | CC 0.923                  | CC 0.922                  | CC 0.915                  | CC 0.912                  |
| EFDC_IL-Yat    | MBE -37.2<br>(-3.9 %)     | MBE 38.9<br>(4.1 %)       | MBE 137.0<br>(14.4 %)     | MBE -11.5<br>(-1.2 %)     | MBE 6.9<br>(0.7 %)        | MBE -44.2<br>(-4.6 %)     | MBE 31.4<br>(3.3 %)       | MBE 128.8<br>(13.5 %)     | MBE -18.8<br>(-2.0 %)     | MBE -0.7<br>(-0.1 %)      | MBE 61.2<br>(6.4 %)       |
| NBDATA: 112699 | STD 116.6<br>(12.3 %)     | STD 126.6<br>(13.3 %)     | STD 162.2<br>(17.1 %)     | STD 118.1<br>(12.4 %)     | STD 122.2<br>(12.9 %)     | STD 127.1<br>(13.4 %)     | STD 132.4<br>(13.9 %)     | STD 161.7<br>(17.0 %)     | STD 126.4<br>(13.3 %)     | STD 125.3<br>(13.2 %)     | STD 141.5<br>(14.9 %)     |
| MEANREF: 950.5 | RMSE<br>122.4 (12.9<br>%) | RMSE<br>132.4 (13.9<br>%) | RMSE<br>212.3 (22.3<br>%) | RMSE<br>118.6 (12.5<br>%) | RMSE<br>122.4 (12.9<br>%) | RMSE<br>134.5 (14.1<br>%) | RMSE<br>136.1 (14.3<br>%) | RMSE<br>206.7 (21.7<br>%) | RMSE<br>127.8 (13.4<br>%) | RMSE<br>125.3 (13.2<br>%) | RMSE<br>154.1 (16.2<br>%) |
|                | CC 0.981                  | CC 0.981                  | CC 0.981                  | CC 0.981                  | CC 0.980                  | CC 0.978                  | CC 0.973                  |
| EFDC_IT-Bci    | MBE 17.9<br>(2.4 %)       | MBE 80.8<br>(11.0 %)      | MBE 161.8<br>(22.0 %)     | MBE 50.3<br>(6.8 %)       | MBE 68.3<br>(9.3 %)       | MBE 24.8<br>(3.4 %)       | MBE 88.3<br>(12.0 %)      | MBE 170.0<br>(23.1 %)     | MBE 57.5<br>(7.8 %)       | MBE 74.4<br>(10.1 %)      | MBE 87.7<br>(11.9 %)      |
| NBDATA: 85222  | STD 137.2<br>(18.6 %)     | STD 148.0<br>(20.1 %)     | STD 178.5<br>(24.2 %)     | STD 142.1<br>(19.3 %)     | STD 145.5<br>(19.8 %)     | STD 133.3<br>(18.1 %)     | STD 146.9<br>(19.9 %)     | STD 180.7<br>(24.5 %)     | STD 140.9<br>(19.1 %)     | STD 144.7<br>(19.6 %)     | STD 152.8<br>(20.7 %)     |
| MEANREF: 736.3 | RMSE<br>138.3 (18.8<br>%) | RMSE<br>168.6 (22.9<br>%) | RMSE<br>240.9 (32.7<br>%) | RMSE<br>150.8 (20.5<br>%) | RMSE<br>160.8 (21.8<br>%) | RMSE<br>135.6 (18.4<br>%) | RMSE<br>171.4 (23.3<br>%) | RMSE<br>248.1 (33.7<br>%) | RMSE<br>152.2 (20.7<br>%) | RMSE<br>162.7 (22.1<br>%) | RMSE<br>176.2 (23.9<br>%) |



|                |                              |                           |                           |                           |                           |                           |                           |                           |                           |                           |                           |
|----------------|------------------------------|---------------------------|---------------------------|---------------------------|---------------------------|---------------------------|---------------------------|---------------------------|---------------------------|---------------------------|---------------------------|
|                | CC 0.968                     | CC 0.968                  | CC 0.968                  | CC 0.968                  | CC 0.967                  | CC 0.970                  | CC 0.970                  | CC 0.970                  | CC 0.970                  | CC 0.969                  | CC 0.965                  |
| EFDC_IT-Noe    | MBE 12.4<br>(1.6 %)          | MBE 78.1<br>(10.1 %)      | MBE 162.6<br>(21.0 %)     | MBE 48.4<br>(6.2 %)       | MBE 63.2<br>(8.2 %)       | MBE 8.4<br>(1.1 %)        | MBE 73.7<br>(9.5 %)       | MBE 157.8<br>(20.4 %)     | MBE 44.3<br>(5.7 %)       | MBE 59.5<br>(7.7 %)       | MBE 65.5<br>(8.5 %)       |
| NBDATA: 38582  | STD 120.4<br>(15.5 %)        | STD 134.7<br>(17.4 %)     | STD 170.6<br>(22.0 %)     | STD 127.5<br>(16.5 %)     | STD 131.0<br>(16.9 %)     | STD 121.4<br>(15.7 %)     | STD 133.9<br>(17.3 %)     | STD 168.0<br>(21.7 %)     | STD 127.9<br>(16.5 %)     | STD 133.2<br>(17.2 %)     | STD 126.3<br>(16.3 %)     |
| MEANREF: 774.8 | RMSE<br>121.1 (15.6<br>%)    | RMSE<br>155.7 (20.1<br>%) | RMSE<br>235.7 (30.4<br>%) | RMSE<br>136.4 (17.6<br>%) | RMSE<br>145.4 (18.8<br>%) | RMSE<br>121.6 (15.7<br>%) | RMSE<br>152.9 (19.7<br>%) | RMSE<br>230.5 (29.7<br>%) | RMSE<br>135.4 (17.5<br>%) | RMSE<br>145.9 (18.8<br>%) | RMSE<br>142.3 (18.4<br>%) |
|                | CC 0.976                     | CC 0.976                  | CC 0.976                  | CC 0.976                  | CC 0.975                  | CC 0.976                  | CC 0.976                  | CC 0.976                  | CC 0.976                  | CC 0.974                  | CC 0.976                  |
| EFDC_RU-Fyo    | MBE 34.3<br>(7.5 %)          | MBE 75.2<br>(16.5 %)      | MBE 127.8<br>(28.0 %)     | MBE 48.0<br>(10.5 %)      | MBE 72.3<br>(15.9 %)      | MBE 5.0<br>(1.1 %)        | MBE 41.5<br>(9.6 %)       | MBE 88.6<br>(20.4 %)      | MBE 16.3<br>(3.8 %)       | MBE 36.9<br>(8.5 %)       | MBE 44.3<br>(10.2 %)      |
| NBDATA: 126014 | STD 158.7<br>(34.8 %)        | STD 173.3<br>(38.0 %)     | STD 200.3<br>(44.0 %)     | STD 167.2<br>(36.7 %)     | STD 177.5<br>(39.0 %)     | STD 149.8<br>(34.6 %)     | STD 154.7<br>(35.7 %)     | STD 170.3<br>(39.3 %)     | STD 152.6<br>(35.2 %)     | STD 153.2<br>(35.3 %)     | STD 147.8<br>(34.1 %)     |
| MEANREF: 455.6 | RMSE<br>162.3 (35.6<br>%)    | RMSE<br>188.9 (41.5<br>%) | RMSE<br>237.6 (52.1<br>%) | RMSE<br>174.0 (38.2<br>%) | RMSE<br>191.7 (42.1<br>%) | RMSE<br>149.9 (34.6<br>%) | RMSE<br>160.2 (37.0<br>%) | RMSE<br>191.9 (44.3<br>%) | RMSE<br>153.4 (35.4<br>%) | RMSE<br>157.6 (36.4<br>%) | RMSE<br>154.3 (35.6<br>%) |
|                | CC 0.931                     | CC 0.931                  | CC 0.931                  | CC 0.930                  | CC 0.924                  | CC 0.932                  | CC 0.932                  | CC 0.932                  | CC 0.931                  | CC 0.932                  | CC 0.941                  |
| EFDC_SN-Dhr    | MBE -<br>113.8 (-<br>11.7 %) | MBE -42.2<br>(-4.3 %)     | MBE 50.0<br>(5.1 %)       | MBE -64.2<br>(-6.6 %)     | MBE -49.4<br>(-5.1 %)     | MBE 7.8<br>(0.8 %)        | MBE 89.5<br>(9.2 %)       | MBE 194.7<br>(20.0 %)     | MBE 65.2<br>(6.7 %)       | MBE 78.4<br>(8.1 %)       | MBE 144.2<br>(14.8 %)     |
| NBDATA:26234   | STD 158.8<br>(16.3 %)        | STD 162.3<br>(16.7 %)     | STD 184.5<br>(19.0 %)     | STD 160.6<br>(16.5 %)     | STD 158.4<br>(16.3 %)     | STD 140.0<br>(14.4 %)     | STD 157.4<br>(16.2 %)     | STD 196.6<br>(20.2 %)     | STD 156.0<br>(16.0 %)     | STD 161.4<br>(16.6 %)     | STD 170.7<br>(17.6 %)     |
| MEANREF: 972.5 | RMSE<br>195.4 (20.1<br>%)    | RMSE<br>167.7 (17.2<br>%) | RMSE<br>191.2 (19.7<br>%) | RMSE<br>172.9 (17.8<br>%) | RMSE<br>166.0 (17.1<br>%) | RMSE<br>140.3 (14.4<br>%) | RMSE<br>181.1 (18.6<br>%) | RMSE<br>276.7 (28.5<br>%) | RMSE<br>169.1 (17.4<br>%) | RMSE<br>179.4 (18.4<br>%) | RMSE<br>223.4 (23.0<br>%) |
|                | CC 0.962                     | CC 0.962                  | CC 0.962                  | CC 0.962                  | CC 0.963                  | CC 0.972                  | CC 0.972                  | CC 0.972                  | CC 0.970                  | CC 0.967                  | CC 0.967                  |
| EFDC_UK-Amo    | MBE 23.0<br>(6.0 %)          | MBE 57.2<br>(14.8 %)      | MBE 101.1<br>(26.2 %)     | MBE 34.0<br>(8.8 %)       | MBE 61.0<br>(15.8 %)      | MBE 26.7<br>(7.2 %)       | MBE 59.9<br>(16.1 %)      | MBE 102.6<br>(27.6 %)     | MBE 37.0<br>(10.0 %)      | MBE 62.2<br>(16.8 %)      | MBE 59.0<br>(15.9 %)      |
| NBDATA: 101058 | STD 157.5<br>(40.8 %)        | STD 164.9<br>(42.7 %)     | STD 181.0<br>(46.9 %)     | STD 159.3<br>(41.3 %)     | STD 162.6<br>(42.1 %)     | STD 160.0<br>(43.1 %)     | STD 165.7<br>(44.6 %)     | STD 179.3<br>(48.3 %)     | STD 162.0<br>(43.6 %)     | STD 164.5<br>(44.3 %)     | STD 180.5<br>(48.6 %)     |
| MEANREF: 386.0 | RMSE<br>159.1 (41.2<br>%)    | RMSE<br>174.5 (45.2<br>%) | RMSE<br>207.3 (53.7<br>%) | RMSE<br>162.9 (42.2<br>%) | RMSE<br>173.7 (45.0<br>%) | RMSE<br>162.3 (43.7<br>%) | RMSE<br>176.2 (47.4<br>%) | RMSE<br>206.6 (55.6<br>%) | RMSE<br>166.2 (44.7<br>%) | RMSE<br>175.9 (47.3<br>%) | RMSE<br>189.9 (51.1<br>%) |
|                | CC 0.901                     | CC 0.901                  | CC 0.901                  | CC 0.902                  | CC 0.901                  | CC 0.894                  | CC 0.878                  |

|                     |                           |                           |                           |                           |                           |                           |                           |                           |                           |                           |                           |
|---------------------|---------------------------|---------------------------|---------------------------|---------------------------|---------------------------|---------------------------|---------------------------|---------------------------|---------------------------|---------------------------|---------------------------|
| EFDC_ZA-Kru         | MBE -22.5<br>(-2.8 %)     | MBE 43.5<br>(5.3 %)       | MBE 128.6<br>(15.8 %)     | MBE 25.0<br>(3.1 %)       | MBE 56.6<br>(7.0 %)       | MBE 16.4<br>(2.0 %)       | MBE 85.7<br>(10.5 %)      | MBE 174.8<br>(21.5 %)     | MBE 66.5<br>(8.2 %)       | MBE 99.0<br>(12.2 %)      | MBE 82.1<br>(10.1 %)      |
| NBDATA: 4833        | STD 143.2<br>(17.6 %)     | STD 145.2<br>(17.8 %)     | STD 169.5<br>(20.8 %)     | STD 143.0<br>(17.6 %)     | STD 152.6<br>(18.7 %)     | STD 161.0<br>(19.8 %)     | STD 169.7<br>(20.8 %)     | STD 199.6<br>(24.5 %)     | STD 168.8<br>(20.7 %)     | STD 183.3<br>(22.5 %)     | STD 154.3<br>(18.9 %)     |
| MEANREF: 814.4      | RMSE<br>144.9 (17.8<br>%) | RMSE<br>151.6 (18.6<br>%) | RMSE<br>212.8 (26.1<br>%) | RMSE<br>145.2 (17.8<br>%) | RMSE<br>162.8 (20.0<br>%) | RMSE<br>161.8 (19.9<br>%) | RMSE<br>190.1 (23.3<br>%) | RMSE<br>265.3 (32.6<br>%) | RMSE<br>181.4 (22.3<br>%) | RMSE<br>208.3 (25.6<br>%) | RMSE<br>174.8 (21.5<br>%) |
|                     | CC 0.973                  | CC 0.973                  | CC 0.973                  | CC 0.973                  | CC 0.970                  | CC 0.965                  | CC 0.965                  | CC 0.965                  | CC 0.964                  | CC 0.958                  | CC 0.971                  |
| Kishinev            | MBE -45.7<br>(-7.0 %)     | MBE 5.2<br>(0.8 %)        | MBE 70.8<br>(10.8 %)      | MBE -23.5<br>(-3.6 %)     | MBE -3.5<br>(-0.5 %)      | MBE -49.4<br>(-7.5 %)     | MBE 1.2<br>(0.2 %)        | MBE 66.4<br>(10.1 %)      | MBE -27.4<br>(-4.2 %)     | MBE -7.0<br>(-1.1 %)      | MBE -5.5<br>(-0.8 %)      |
| NBDATA: 140960      | STD 145.6<br>(22.2 %)     | STD 145.3<br>(22.1 %)     | STD 162.0<br>(24.7 %)     | STD 143.6<br>(21.9 %)     | STD 144.2<br>(22.0 %)     | STD 142.5<br>(21.7 %)     | STD 139.1<br>(21.2 %)     | STD 152.3<br>(23.2 %)     | STD 138.9<br>(21.2 %)     | STD 141.2<br>(21.5 %)     | STD 137.1<br>(20.9 %)     |
| MEANREF: 656.2      | RMSE<br>152.6 (23.3<br>%) | RMSE<br>145.4 (22.2<br>%) | RMSE<br>176.8 (26.9<br>%) | RMSE<br>145.5 (22.2<br>%) | RMSE<br>144.2 (22.0<br>%) | RMSE<br>150.8 (23.0<br>%) | RMSE<br>139.1 (21.2<br>%) | RMSE<br>166.1 (25.3<br>%) | RMSE<br>141.6 (21.6<br>%) | RMSE<br>141.4 (21.5<br>%) | RMSE<br>137.2 (20.9<br>%) |
|                     | CC 0.965                  | CC 0.967                  | CC 0.967                  | CC 0.967                  | CC 0.967                  | CC 0.966                  | CC 0.968                  |
| Lugo                | MBE 42.5<br>(7.5 %)       | MBE 93.6<br>(16.4 %)      | MBE 159.4<br>(28.0 %)     | MBE 68.4<br>(12.0 %)      | MBE 90.6<br>(15.9 %)      | MBE 58.4<br>(10.2 %)      | MBE 110.8<br>(19.4 %)     | MBE 178.2<br>(31.3 %)     | MBE 84.9<br>(14.9 %)      | MBE 109.8<br>(19.3 %)     | MBE 95.6<br>(16.8 %)      |
| NBDATA: 12738       | STD 185.3<br>(32.5 %)     | STD 194.1<br>(34.0 %)     | STD 216.7<br>(38.0 %)     | STD 187.2<br>(32.8 %)     | STD 187.7<br>(32.9 %)     | STD 191.4<br>(33.6 %)     | STD 200.9<br>(35.3 %)     | STD 224.2<br>(39.3 %)     | STD 194.4<br>(34.1 %)     | STD 201.4<br>(35.3 %)     | STD 204.8<br>(35.9 %)     |
| MEANREF: 570.0      | RMSE<br>190.1 (33.3<br>%) | RMSE<br>215.5 (37.8<br>%) | RMSE<br>269.0 (47.2<br>%) | RMSE<br>199.3 (35.0<br>%) | RMSE<br>208.5 (36.6<br>%) | RMSE<br>200.1 (35.1<br>%) | RMSE<br>229.5 (40.3<br>%) | RMSE<br>286.4 (50.2<br>%) | RMSE<br>212.2 (37.2<br>%) | RMSE<br>229.4 (40.2<br>%) | RMSE<br>226.0 (39.6<br>%) |
|                     | CC 0.933                  | CC 0.933                  | CC 0.933                  | CC 0.934                  | CC 0.934                  | CC 0.928                  | CC 0.928                  | CC 0.928                  | CC 0.930                  | CC 0.926                  | CC 0.921                  |
| PeronneSaintQuentin | MBE 1.1<br>(0.2 %)        | MBE 44.1<br>(8.6 %)       | MBE 99.6<br>(19.3 %)      | MBE 19.1<br>(3.7 %)       | MBE 40.5<br>(7.9 %)       | MBE 11.1<br>(2.2 %)       | MBE 55.0<br>(10.7 %)      | MBE 111.5<br>(21.6 %)     | MBE 29.3<br>(5.7 %)       | MBE 51.4<br>(10.0 %)      | MBE 67.7<br>(13.1 %)      |
| NBDATA: 54875       | STD 114.7<br>(22.3 %)     | STD 120.2<br>(23.3 %)     | STD 141.5<br>(27.5 %)     | STD 115.2<br>(22.4 %)     | STD 116.2<br>(22.5 %)     | STD 119.4<br>(23.2 %)     | STD 124.1<br>(24.1 %)     | STD 144.0<br>(28.0 %)     | STD 120.1<br>(23.3 %)     | STD 125.4<br>(24.3 %)     | STD 130.1<br>(25.2 %)     |
| MEANREF: 515.2      | RMSE<br>114.7 (22.3<br>%) | RMSE<br>128.0 (24.8<br>%) | RMSE<br>173.0 (33.6<br>%) | RMSE<br>116.8 (22.7<br>%) | RMSE<br>123.0 (23.9<br>%) | RMSE<br>119.9 (23.3<br>%) | RMSE<br>135.7 (26.3<br>%) | RMSE<br>182.1 (35.3<br>%) | RMSE<br>123.6 (24.0<br>%) | RMSE<br>135.5 (26.3<br>%) | RMSE<br>146.6 (28.5<br>%) |
|                     | CC 0.967                  | CC 0.967                  | CC 0.967                  | CC 0.968                  | CC 0.968                  | CC 0.965                  | CC 0.965                  | CC 0.965                  | CC 0.965                  | CC 0.963                  | CC 0.961                  |
| Pokola              | MBE -27.9<br>(-3.5 %)     | MBE 37.1<br>(4.6 %)       | MBE 120.8<br>(15.0 %)     | MBE 40.2<br>(5.0 %)       | MBE 63.6<br>(7.9 %)       | MBE 70.0<br>(8.7 %)       | MBE 143.2<br>(17.7 %)     | MBE 237.4<br>(29.4 %)     | MBE 146.8<br>(18.2 %)     | MBE 171.9<br>(21.3 %)     | MBE 157.9<br>(19.6 %)     |

|                |                           |                           |                           |                           |                           |                           |                           |                           |                           |                           |                           |
|----------------|---------------------------|---------------------------|---------------------------|---------------------------|---------------------------|---------------------------|---------------------------|---------------------------|---------------------------|---------------------------|---------------------------|
| NBDATA: 15392  | STD 209.6<br>(26.0 %)     | STD 211.6<br>(26.2 %)     | STD 227.3<br>(28.1 %)     | STD 210.3<br>(26.0 %)     | STD 210.1<br>(26.0 %)     | STD 213.5<br>(26.4 %)     | STD 223.3<br>(27.6 %)     | STD 248.9<br>(30.8 %)     | STD 223.2<br>(27.6 %)     | STD 231.8<br>(28.7 %)     | STD 235.0<br>(29.1 %)     |
| MEANREF: 807.7 | RMSE<br>211.5 (26.2<br>%) | RMSE<br>214.8 (26.6<br>%) | RMSE<br>257.4 (31.9<br>%) | RMSE<br>214.1 (26.5<br>%) | RMSE<br>219.5 (27.2<br>%) | RMSE<br>224.7 (27.8<br>%) | RMSE<br>265.2 (32.8<br>%) | RMSE<br>344.0 (42.6<br>%) | RMSE<br>267.2 (33.1<br>%) | RMSE<br>288.6 (35.7<br>%) | RMSE<br>283.1 (35.1<br>%) |
|                | CC 0.934                  | CC 0.934                  | CC 0.934                  | CC 0.935                  | CC 0.936                  | CC 0.932                  | CC 0.932                  | CC 0.932                  | CC 0.933                  | CC 0.928                  | CC 0.925                  |
| Uruguay        | MBE -75.8<br>(-7.9 %)     | MBE -2.0<br>(-0.2 %)      | MBE 93.0<br>(9.7 %)       | MBE -23.6<br>(-2.5 %)     | MBE 8.7<br>(0.9 %)        | MBE -81.3<br>(-8.5 %)     | MBE -8.0<br>(-0.8 %)      | MBE 86.5<br>(9.0 %)       | MBE -29.2<br>(-3.0 %)     | MBE 0.0<br>(0.0 %)        | MBE -2.8<br>(-0.3 %)      |
| NBDATA: 28349  | STD 184.2<br>(19.2 %)     | STD 195.3<br>(20.3 %)     | STD 225.1<br>(23.4 %)     | STD 191.1<br>(19.9 %)     | STD 219.0<br>(22.8 %)     | STD 162.7<br>(16.9 %)     | STD 165.7<br>(17.2 %)     | STD 187.8<br>(19.5 %)     | STD 163.8<br>(17.0 %)     | STD 177.2<br>(18.4 %)     | STD 186.4<br>(19.4 %)     |
| MEANREF: 961.2 | RMSE<br>199.2 (20.7<br>%) | RMSE<br>195.3 (20.3<br>%) | RMSE<br>243.6 (25.3<br>%) | RMSE<br>192.5 (20.0<br>%) | RMSE<br>219.2 (22.8<br>%) | RMSE<br>181.9 (18.9<br>%) | RMSE<br>165.9 (17.3<br>%) | RMSE<br>206.8 (21.5<br>%) | RMSE<br>166.4 (17.3<br>%) | RMSE<br>177.2 (18.4<br>%) | RMSE<br>186.4 (19.4<br>%) |
|                | CC 0.952                  | CC 0.952                  | CC 0.952                  | CC 0.952                  | CC 0.936                  | CC 0.963                  | CC 0.963                  | CC 0.963                  | CC 0.963                  | CC 0.956                  | CC 0.954                  |
| Valenciennes   | MBE -24.6<br>(-4.3 %)     | MBE 21.2<br>(3.7 %)       | MBE 80.2<br>(14.0 %)      | MBE -4.8<br>(-0.8 %)      | MBE 15.6<br>(2.7 %)       | MBE -17.1<br>(-3.0 %)     | MBE 29.3<br>(5.1 %)       | MBE 89.1<br>(15.5 %)      | MBE 2.9<br>(0.5 %)        | MBE 25.8<br>(4.5 %)       | MBE 37.8<br>(6.6 %)       |
| NBDATA: 7064   | STD 131.4<br>(22.9 %)     | STD 134.0<br>(23.3 %)     | STD 152.0<br>(26.5 %)     | STD 130.5<br>(22.7 %)     | STD 132.4<br>(23.1 %)     | STD 139.1<br>(24.2 %)     | STD 139.0<br>(24.2 %)     | STD 152.7<br>(26.6 %)     | STD 137.2<br>(23.9 %)     | STD 143.9<br>(25.1 %)     | STD 145.0<br>(25.3 %)     |
| MEANREF: 574.2 | RMSE<br>133.7 (23.3<br>%) | RMSE<br>135.7 (23.6<br>%) | RMSE<br>171.9 (29.9<br>%) | RMSE<br>130.6 (22.7<br>%) | RMSE<br>133.3 (23.2<br>%) | RMSE<br>140.1 (24.4<br>%) | RMSE<br>142.0 (24.7<br>%) | RMSE<br>176.8 (30.8<br>%) | RMSE<br>137.3 (23.9<br>%) | RMSE<br>146.2 (25.5<br>%) | RMSE<br>149.8 (26.1<br>%) |
|                | CC 0.962                  | CC 0.962                  | CC 0.962                  | CC 0.963                  | CC 0.962                  | CC 0.958                  | CC 0.958                  | CC 0.958                  | CC 0.959                  | CC 0.955                  | CC 0.954                  |
| Villaviciosa   | MBE -13.1<br>(-2.3 %)     | MBE 33.2<br>(5.8 %)       | MBE 92.8<br>(16.3 %)      | MBE 13.0<br>(2.3 %)       | MBE 33.8<br>(6.0 %)       | MBE 31.5<br>(5.5 %)       | MBE 81.5<br>(14.3 %)      | MBE 145.9<br>(25.7 %)     | MBE 59.8<br>(10.5 %)      | MBE 86.4<br>(15.2 %)      | MBE 44.1<br>(7.8 %)       |
| NBDATA: 13535  | STD 151.6<br>(26.7 %)     | STD 156.6<br>(27.5 %)     | STD 176.4<br>(31.0 %)     | STD 153.3<br>(27.0 %)     | STD 150.6<br>(26.5 %)     | STD 149.3<br>(26.3 %)     | STD 154.2<br>(27.1 %)     | STD 174.1<br>(30.6 %)     | STD 152.0<br>(26.7 %)     | STD 162.0<br>(28.5 %)     | STD 157.6<br>(27.7 %)     |
| MEANREF: 568.6 | RMSE<br>152.2 (26.8<br>%) | RMSE<br>160.1 (28.2<br>%) | RMSE<br>199.4 (35.1<br>%) | RMSE<br>153.8 (27.1<br>%) | RMSE<br>154.4 (27.2<br>%) | RMSE<br>152.6 (26.8<br>%) | RMSE<br>174.4 (30.7<br>%) | RMSE<br>227.2 (40.0<br>%) | RMSE<br>163.4 (28.7<br>%) | RMSE<br>183.6 (32.3<br>%) | RMSE<br>163.7 (28.8<br>%) |
|                | CC 0.953                  | CC 0.953                  | CC 0.953                  | CC 0.953                  | CC 0.955                  | CC 0.954                  | CC 0.954                  | CC 0.954                  | CC 0.954                  | CC 0.948                  | CC 0.949                  |
| Vitoria        | MBE 40.0<br>(6.4 %)       | MBE 95.4<br>(15.3 %)      | MBE 166.7<br>(26.7 %)     | MBE 67.8<br>(10.8 %)      | MBE 91.7<br>(14.7 %)      | MBE 40.5<br>(6.5 %)       | MBE 96.0<br>(15.4 %)      | MBE 167.4<br>(26.8 %)     | MBE 68.4<br>(10.9 %)      | MBE 91.8<br>(14.7 %)      | MBE 77.2<br>(12.3 %)      |
| NBDATA: 13551  | STD 164.7<br>(26.4 %)     | STD 170.4<br>(27.3 %)     | STD 192.1<br>(30.7 %)     | STD 167.1<br>(26.8 %)     | STD 173.5<br>(27.8 %)     | STD 175.4<br>(28.1 %)     | STD 182.3<br>(29.2 %)     | STD 204.6<br>(32.7 %)     | STD 178.9<br>(28.6 %)     | STD 188.0<br>(30.1 %)     | STD 188.8<br>(30.2 %)     |

|                |                           |                           |                           |                           |                           |                           |                           |                           |                           |                           |                           |
|----------------|---------------------------|---------------------------|---------------------------|---------------------------|---------------------------|---------------------------|---------------------------|---------------------------|---------------------------|---------------------------|---------------------------|
| MEANREF: 624.7 | RMSE<br>169.5 (27.1<br>%) | RMSE<br>195.3 (31.3<br>%) | RMSE<br>254.3 (40.7<br>%) | RMSE<br>180.3 (28.9<br>%) | RMSE<br>196.2 (31.4<br>%) | RMSE<br>180.0 (28.8<br>%) | RMSE<br>206.0 (33.0<br>%) | RMSE<br>264.4 (42.3<br>%) | RMSE<br>191.5 (30.7<br>%) | RMSE<br>209.2 (33.5<br>%) | RMSE<br>203.9 (32.6<br>%) |
|                | CC 0.952                  | CC 0.952                  | CC 0.952                  | CC 0.952                  | CC 0.948                  | CC 0.945                  | CC 0.945                  | CC 0.945                  | CC 0.945                  | CC 0.940                  | CC 0.938                  |
| Zaragoza       | MBE 22.6<br>(3.1 %)       | MBE 86.0<br>(11.7 %)      | MBE 167.7<br>(22.7 %)     | MBE 55.8<br>(7.6 %)       | MBE 74.1<br>(10.0 %)      | MBE 29.2<br>(4.0 %)       | MBE 93.2<br>(12.6 %)      | MBE 175.6<br>(23.8 %)     | MBE 62.6<br>(8.5 %)       | MBE 80.0<br>(10.8 %)      | MBE 97.8<br>(13.2 %)      |
| NBDATA: 13575  | STD 171.0<br>(23.2 %)     | STD 178.0<br>(24.1 %)     | STD 201.9<br>(27.3 %)     | STD 174.7<br>(23.7 %)     | STD 182.5<br>(24.7 %)     | STD 168.4<br>(22.8 %)     | STD 176.3<br>(23.9 %)     | STD 201.5<br>(27.3 %)     | STD 172.9<br>(23.4 %)     | STD 180.7<br>(24.5 %)     | STD 177.0<br>(24.0 %)     |
| MEANREF: 738.4 | RMSE<br>172.5 (23.4<br>%) | RMSE<br>197.7 (26.8<br>%) | RMSE<br>262.5 (35.6<br>%) | RMSE<br>183.4 (24.8<br>%) | RMSE<br>197.0 (26.7<br>%) | RMSE<br>171.0 (23.2<br>%) | RMSE<br>199.4 (27.0<br>%) | RMSE<br>267.2 (36.2<br>%) | RMSE<br>183.9 (24.9<br>%) | RMSE<br>197.6 (26.8<br>%) | RMSE<br>202.2 (27.4<br>%) |
|                | CC 0.953                  | CC 0.953                  | CC 0.953                  | CC 0.952                  | CC 0.948                  | CC 0.954                  | CC 0.954                  | CC 0.954                  | CC 0.954                  | CC 0.950                  | CC 0.951                  |

---

*Table S1: Validation results for the comparison between the 11 methods to estimate PAR from satellite imagery at the 33 in-situ stations in all-weather conditions*

---

|                                                                                                                      |                                                                                                                      |                        |                        |                        |                        |                         |                        |                        |                         |                        |                         |
|----------------------------------------------------------------------------------------------------------------------|----------------------------------------------------------------------------------------------------------------------|------------------------|------------------------|------------------------|------------------------|-------------------------|------------------------|------------------------|-------------------------|------------------------|-------------------------|
| # Quality assessment of 11 methods to derive 30-min PAR [400-700] nm from satellite imagery in cloud-free conditions |                                                                                                                      |                        |                        |                        |                        |                         |                        |                        |                         |                        |                         |
| # Author - date                                                                                                      | Dr Claire THOMAS – Date of the generation of the results: June 2022                                                  |                        |                        |                        |                        |                         |                        |                        |                         |                        |                         |
| # Method 1 (M1)                                                                                                      | Jacovides (2004) from HC3 (coeff 1.919)                                                                              |                        |                        |                        |                        |                         |                        |                        |                         |                        |                         |
| # Method 2 (M2)                                                                                                      | Udo et Aro (1999) from HC3 (coeff 2.079)                                                                             |                        |                        |                        |                        |                         |                        |                        |                         |                        |                         |
| # Method 3 (M3)                                                                                                      | Szeicz (1974) from HC3 (coeff 2.285)                                                                                 |                        |                        |                        |                        |                         |                        |                        |                         |                        |                         |
| # Method 4 (M4)                                                                                                      | Weighted Kato BB CMF from HC3                                                                                        |                        |                        |                        |                        |                         |                        |                        |                         |                        |                         |
| # Method 5 (M5)                                                                                                      | Weighted Kato PAR CMF from HC3                                                                                       |                        |                        |                        |                        |                         |                        |                        |                         |                        |                         |
| # Method 6 (M6)                                                                                                      | Jacovides (2004) from CAMS (coeff 1.919)                                                                             |                        |                        |                        |                        |                         |                        |                        |                         |                        |                         |
| # Method 7 (M7)                                                                                                      | Udo et Aro (1999) from CAMS (coeff 2.079)                                                                            |                        |                        |                        |                        |                         |                        |                        |                         |                        |                         |
| # Method 8 (M8)                                                                                                      | Szeicz (1974) from CAMS (coeff 2.285)                                                                                |                        |                        |                        |                        |                         |                        |                        |                         |                        |                         |
| # Method 9 (M9)                                                                                                      | Weighted Kato BB CMF from CAMS                                                                                       |                        |                        |                        |                        |                         |                        |                        |                         |                        |                         |
| # Method 10 (M10)                                                                                                    | Weighted Kato PAR CMF from CAMS                                                                                      |                        |                        |                        |                        |                         |                        |                        |                         |                        |                         |
| # Method 11 (M11)                                                                                                    | DWD SARAH-3                                                                                                          |                        |                        |                        |                        |                         |                        |                        |                         |                        |                         |
| # MBE                                                                                                                | Bias in $\mu\text{mol}/\text{m}^2/\text{s}$ (relative bias in percent) - ideal 0                                     |                        |                        |                        |                        |                         |                        |                        |                         |                        |                         |
| # STD                                                                                                                | STandard Deviation in $\mu\text{mol}/\text{m}^2/\text{s}$ (relative standard deviation in percent) - ideal 0         |                        |                        |                        |                        |                         |                        |                        |                         |                        |                         |
| # RMSE                                                                                                               | Root Mean Square Error in $\mu\text{mol}/\text{m}^2/\text{s}$ (relative Root Mean Square Error in percent) - ideal 0 |                        |                        |                        |                        |                         |                        |                        |                         |                        |                         |
| # CC                                                                                                                 | Correlation Coefficient - ideal 1                                                                                    |                        |                        |                        |                        |                         |                        |                        |                         |                        |                         |
| # Station                                                                                                            | M1                                                                                                                   | M2                     | M3                     | M4                     | M5                     | M6                      | M7                     | M8                     | M9                      | M10                    | M11                     |
| Aberystwyth_University                                                                                               | MBE -103.5<br>(-12.1 %)                                                                                              | MBE -41.1<br>(-4.8 %)  | MBE 39.2<br>(4.6 %)    | MBE -75.5<br>(-8.9 %)  | MBE -69.2<br>(-8.1 %)  | MBE -132.1<br>(-15.5 %) | MBE -72.1<br>(-8.5 %)  | MBE 5.2<br>(0.6 %)     | MBE -105.4<br>(-12.4 %) | MBE -93.0<br>(-10.9 %) | MBE -110.1<br>(-12.9 %) |
| NBDATA: 16298                                                                                                        | STD 120.7<br>(14.2 %)                                                                                                | STD 124.1<br>(14.6 %)  | STD 144.9<br>(17.0 %)  | STD 119.7<br>(14.0 %)  | STD 114.7<br>(13.5 %)  | STD 116.7<br>(13.7 %)   | STD 111.7<br>(13.1 %)  | STD 122.9<br>(14.4 %)  | STD 110.0<br>(12.9 %)   | STD 104.9<br>(12.3 %)  | STD 152.7<br>(17.9 %)   |
| MEANREF: 851.8                                                                                                       | RMSE 159.0<br>(18.7 %)                                                                                               | RMSE 130.7<br>(15.3 %) | RMSE 150.1<br>(17.6 %) | RMSE 141.5<br>(16.6 %) | RMSE 133.9<br>(15.7 %) | RMSE 176.3<br>(20.7 %)  | RMSE 132.9<br>(15.6 %) | RMSE 123.0<br>(14.4 %) | RMSE 152.4<br>(17.9 %)  | RMSE 140.2<br>(16.5 %) | RMSE 188.3<br>(22.1 %)  |
|                                                                                                                      | CC 0.970                                                                                                             | CC 0.970               | CC 0.970               | CC 0.971               | CC 0.973               | CC 0.974                | CC 0.974               | CC 0.974               | CC 0.975                | CC 0.977               | CC 0.952                |
| Abbotts_Hall                                                                                                         | MBE -70.8 (-<br>9.2 %)                                                                                               | MBE -12.8<br>(-1.7 %)  | MBE 61.9<br>(8.1 %)    | MBE -42.6<br>(-5.6 %)  | MBE -33.9<br>(-4.4 %)  | MBE -87.0 (-<br>11.4 %) | MBE -30.4<br>(-4.0 %)  | MBE 42.6<br>(5.6 %)    | MBE -59.9 (-<br>7.8 %)  | MBE -48.2<br>(-6.3 %)  | MBE -25.6 (-<br>3.3 %)  |
| NBDATA: 5358                                                                                                         | STD 111.9<br>(14.6 %)                                                                                                | STD 117.6<br>(15.3 %)  | STD 140.4<br>(18.3 %)  | STD 115.1<br>(15.0 %)  | STD 110.4<br>(14.4 %)  | STD 105.1<br>(13.7 %)   | STD 102.5<br>(13.4 %)  | STD 116.5<br>(15.2 %)  | STD 101.6<br>(13.3 %)   | STD 97.3<br>(12.7 %)   | STD 114.3<br>(14.9 %)   |
| MEANREF: 766.4                                                                                                       | RMSE 132.4<br>(17.3 %)                                                                                               | RMSE 118.3<br>(15.4 %) | RMSE 153.4<br>(20.0 %) | RMSE 122.7<br>(16.0 %) | RMSE 115.5<br>(15.1 %) | RMSE 136.4<br>(17.8 %)  | RMSE 106.9<br>(13.9 %) | RMSE 124.1<br>(16.2 %) | RMSE 118.0<br>(15.4 %)  | RMSE 108.6<br>(14.2 %) | RMSE 117.1<br>(15.3 %)  |

|                        |                      |                     |                     |                     |                     |                      |                     |                     |                      |                     |                      |
|------------------------|----------------------|---------------------|---------------------|---------------------|---------------------|----------------------|---------------------|---------------------|----------------------|---------------------|----------------------|
|                        | CC 0.971             | CC 0.971            | CC 0.971            | CC 0.971            | CC 0.973            | CC 0.976             | CC 0.976            | CC 0.976            | CC 0.976             | CC 0.978            | CC 0.970             |
| Albacete               | MBE -69.9 (-6.6 %)   | MBE 11.9 (1.1 %)    | MBE 117.2 (11.2 %)  | MBE -34.3 (-3.3 %)  | MBE -21.9 (-2.1 %)  | MBE -57.4 (-5.5 %)   | MBE 25.4 (2.4 %)    | MBE 132.1 (12.6 %)  | MBE -21.5 (-2.0 %)   | MBE -9.5 (-0.9 %)   | MBE 12.5 (1.2 %)     |
| NBDATA: 8332           | STD 67.4 (6.4 %)     | STD 83.0 (7.9 %)    | STD 127.0 (12.1 %)  | STD 74.2 (7.1 %)    | STD 76.7 (7.3 %)    | STD 70.4 (6.7 %)     | STD 88.1 (8.4 %)    | STD 133.1 (12.7 %)  | STD 78.8 (7.5 %)     | STD 78.9 (7.5 %)    | STD 80.9 (7.7 %)     |
| MEANREF: 1050.7        | RMSE 97.1 (9.2 %)    | RMSE 83.8 (8.0 %)   | RMSE 172.8 (16.4 %) | RMSE 81.7 (7.8 %)   | RMSE 79.7 (7.6 %)   | RMSE 90.8 (8.6 %)    | RMSE 91.7 (8.7 %)   | RMSE 187.5 (17.8 %) | RMSE 81.6 (7.8 %)    | RMSE 79.5 (7.6 %)   | RMSE 81.9 (7.8 %)    |
|                        | CC 0.993             | CC 0.993            | CC 0.993            | CC 0.992            | CC 0.993            | CC 0.992             | CC 0.992            | CC 0.992            | CC 0.992             | CC 0.993            | CC 0.991             |
| Cordoba                | MBE -32.4 (-3.1 %)   | MBE 51.0 (4.9 %)    | MBE 158.4 (15.3 %)  | MBE 11.9 (1.2 %)    | MBE 21.2 (2.1 %)    | MBE -39.1 (-3.8 %)   | MBE 43.7 (4.2 %)    | MBE 150.4 (14.6 %)  | MBE 4.7 (0.5 %)      | MBE 16.2 (1.6 %)    | MBE 41.6 (4.0 %)     |
| NBDATA: 9726           | STD 64.9 (6.3 %)     | STD 86.9 (8.4 %)    | STD 135.2 (13.1 %)  | STD 77.6 (7.5 %)    | STD 76.9 (7.4 %)    | STD 69.3 (6.7 %)     | STD 86.7 (8.4 %)    | STD 131.6 (12.7 %)  | STD 78.4 (7.6 %)     | STD 78.0 (7.6 %)    | STD 76.4 (7.4 %)     |
| MEANREF: 1032.7        | RMSE 72.5 (7.0 %)    | RMSE 100.7 (9.8 %)  | RMSE 208.2 (20.2 %) | RMSE 78.5 (7.6 %)   | RMSE 79.7 (7.7 %)   | RMSE 79.5 (7.7 %)    | RMSE 97.1 (9.4 %)   | RMSE 199.8 (19.3 %) | RMSE 78.5 (7.6 %)    | RMSE 79.7 (7.7 %)   | RMSE 87.0 (8.4 %)    |
|                        | CC 0.993             | CC 0.993            | CC 0.993            | CC 0.993            | CC 0.994            | CC 0.992             | CC 0.992            | CC 0.992            | CC 0.992             | CC 0.993            | CC 0.992             |
| Czech_BKF_SF           | MBE -14.5 (-1.7 %)   | MBE 56.2 (6.5 %)    | MBE 147.3 (17.1 %)  | MBE 9.2 (1.1 %)     | MBE 13.2 (1.5 %)    | MBE -49.5 (-5.7 %)   | MBE 18.3 (2.1 %)    | MBE 105.7 (12.2 %)  | MBE -27.3 (-3.2 %)   | MBE -14.5 (-1.7 %)  | MBE -24.3 (-2.8 %)   |
| NBDATA: 31397          | STD 123.2 (14.3 %)   | STD 143.2 (16.6 %)  | STD 181.5 (21.0 %)  | STD 132.2 (15.3 %)  | STD 124.4 (14.4 %)  | STD 118.6 (13.7 %)   | STD 126.9 (14.7 %)  | STD 153.6 (17.8 %)  | STD 119.9 (13.9 %)   | STD 114.9 (13.3 %)  | STD 129.5 (15.0 %)   |
| MEANREF: 863.1         | RMSE 124.1 (14.4 %)  | RMSE 153.8 (17.8 %) | RMSE 233.8 (27.1 %) | RMSE 132.5 (15.4 %) | RMSE 125.1 (14.5 %) | RMSE 128.5 (14.9 %)  | RMSE 128.2 (14.9 %) | RMSE 186.4 (21.6 %) | RMSE 123.0 (14.2 %)  | RMSE 115.8 (13.4 %) | RMSE 131.7 (15.3 %)  |
|                        | CC 0.972             | CC 0.972            | CC 0.972            | CC 0.972            | CC 0.976            | CC 0.971             | CC 0.971            | CC 0.971            | CC 0.972             | CC 0.975            | CC 0.967             |
| Aberystwyth_University | MBE -103.5 (-12.1 %) | MBE -41.1 (-4.8 %)  | MBE 39.2 (4.6 %)    | MBE -75.5 (-8.9 %)  | MBE -69.2 (-8.1 %)  | MBE -132.1 (-15.5 %) | MBE -72.1 (-8.5 %)  | MBE 5.2 (0.6 %)     | MBE -105.4 (-12.4 %) | MBE -93.0 (-10.9 %) | MBE -110.1 (-12.9 %) |
| NBDATA: 16298          | STD 120.7 (14.2 %)   | STD 124.1 (14.6 %)  | STD 144.9 (17.0 %)  | STD 119.7 (14.0 %)  | STD 114.7 (13.5 %)  | STD 116.7 (13.7 %)   | STD 111.7 (13.1 %)  | STD 122.9 (14.4 %)  | STD 110.0 (12.9 %)   | STD 104.9 (12.3 %)  | STD 152.7 (17.9 %)   |
| MEANREF: 851.8         | RMSE 159.0 (18.7 %)  | RMSE 130.7 (15.3 %) | RMSE 150.1 (17.6 %) | RMSE 141.5 (16.6 %) | RMSE 133.9 (15.7 %) | RMSE 176.3 (20.7 %)  | RMSE 132.9 (15.6 %) | RMSE 123.0 (14.4 %) | RMSE 152.4 (17.9 %)  | RMSE 140.2 (16.5 %) | RMSE 188.3 (22.1 %)  |
|                        | CC 0.970             | CC 0.970            | CC 0.970            | CC 0.971            | CC 0.973            | CC 0.974             | CC 0.974            | CC 0.974            | CC 0.975             | CC 0.977            | CC 0.952             |
| Abbotts_Hall           | MBE -70.8 (-9.2 %)   | MBE -12.8 (-1.7 %)  | MBE 61.9 (8.1 %)    | MBE -42.6 (-5.6 %)  | MBE -33.9 (-4.4 %)  | MBE -87.0 (-11.4 %)  | MBE -30.4 (-4.0 %)  | MBE 42.6 (5.6 %)    | MBE -59.9 (-7.8 %)   | MBE -48.2 (-6.3 %)  | MBE -25.6 (-3.3 %)   |
| NBDATA: 5358           | STD 111.9 (14.6 %)   | STD 117.6 (15.3 %)  | STD 140.4 (18.3 %)  | STD 115.1 (15.0 %)  | STD 110.4 (14.4 %)  | STD 105.1 (13.7 %)   | STD 102.5 (13.4 %)  | STD 116.5 (15.2 %)  | STD 101.6 (13.3 %)   | STD 97.3 (12.7 %)   | STD 114.3 (14.9 %)   |
| MEANREF: 766.4         | RMSE 132.4 (17.3 %)  | RMSE 118.3 (15.4 %) | RMSE 153.4 (20.0 %) | RMSE 122.7 (16.0 %) | RMSE 115.5 (15.1 %) | RMSE 136.4 (17.8 %)  | RMSE 106.9 (13.9 %) | RMSE 124.1 (16.2 %) | RMSE 118.0 (15.4 %)  | RMSE 108.6 (14.2 %) | RMSE 117.1 (15.3 %)  |
|                        | CC 0.971             | CC 0.971            | CC 0.971            | CC 0.971            | CC 0.973            | CC 0.976             | CC 0.976            | CC 0.976            | CC 0.976             | CC 0.978            | CC 0.970             |
| Albacete               | MBE -69.9 (-6.6 %)   | MBE 11.9 (1.1 %)    | MBE 117.2 (11.2 %)  | MBE -34.3 (-3.3 %)  | MBE -21.9 (-2.1 %)  | MBE -57.4 (-5.5 %)   | MBE 25.4 (2.4 %)    | MBE 132.1 (12.6 %)  | MBE -21.5 (-2.0 %)   | MBE -9.5 (-0.9 %)   | MBE 12.5 (1.2 %)     |

|                 |                        |                        |                        |                        |                        |                        |                        |                        |                        |                        |                        |
|-----------------|------------------------|------------------------|------------------------|------------------------|------------------------|------------------------|------------------------|------------------------|------------------------|------------------------|------------------------|
| NBDATA: 8332    | STD 67.4<br>(6.4 %)    | STD 83.0<br>(7.9 %)    | STD 127.0<br>(12.1 %)  | STD 74.2<br>(7.1 %)    | STD 76.7<br>(7.3 %)    | STD 70.4<br>(6.7 %)    | STD 88.1<br>(8.4 %)    | STD 133.1<br>(12.7 %)  | STD 78.8<br>(7.5 %)    | STD 78.9<br>(7.5 %)    | STD 80.9<br>(7.7 %)    |
| MEANREF: 1050.7 | RMSE 97.1<br>(9.2 %)   | RMSE 83.8<br>(8.0 %)   | RMSE 172.8<br>(16.4 %) | RMSE 81.7<br>(7.8 %)   | RMSE 79.7<br>(7.6 %)   | RMSE 90.8<br>(8.6 %)   | RMSE 91.7<br>(8.7 %)   | RMSE 187.5<br>(17.8 %) | RMSE 81.6<br>(7.8 %)   | RMSE 79.5<br>(7.6 %)   | RMSE 81.9<br>(7.8 %)   |
|                 | CC 0.993               | CC 0.993               | CC 0.993               | CC 0.992               | CC 0.993               | CC 0.992               | CC 0.992               | CC 0.992               | CC 0.992               | CC 0.993               | CC 0.991               |
| Cordoba         | MBE -32.4 (-<br>3.1 %) | MBE 51.0<br>(4.9 %)    | MBE 158.4<br>(15.3 %)  | MBE 11.9<br>(1.2 %)    | MBE 21.2<br>(2.1 %)    | MBE -39.1 (-<br>3.8 %) | MBE 43.7<br>(4.2 %)    | MBE 150.4<br>(14.6 %)  | MBE 4.7<br>(0.5 %)     | MBE 16.2<br>(1.6 %)    | MBE 41.6<br>(4.0 %)    |
| NBDATA: 9726    | STD 64.9<br>(6.3 %)    | STD 86.9<br>(8.4 %)    | STD 135.2<br>(13.1 %)  | STD 77.6<br>(7.5 %)    | STD 76.9<br>(7.4 %)    | STD 69.3<br>(6.7 %)    | STD 86.7<br>(8.4 %)    | STD 131.6<br>(12.7 %)  | STD 78.4<br>(7.6 %)    | STD 78.0<br>(7.6 %)    | STD 76.4<br>(7.4 %)    |
| MEANREF: 1032.7 | RMSE 72.5<br>(7.0 %)   | RMSE 100.7<br>(9.8 %)  | RMSE 208.2<br>(20.2 %) | RMSE 78.5<br>(7.6 %)   | RMSE 79.7<br>(7.7 %)   | RMSE 79.5<br>(7.7 %)   | RMSE 97.1<br>(9.4 %)   | RMSE 199.8<br>(19.3 %) | RMSE 78.5<br>(7.6 %)   | RMSE 79.7<br>(7.7 %)   | RMSE 87.0<br>(8.4 %)   |
|                 | CC 0.993               | CC 0.993               | CC 0.993               | CC 0.993               | CC 0.994               | CC 0.992               | CC 0.992               | CC 0.992               | CC 0.992               | CC 0.993               | CC 0.992               |
| Czech_BKF_SF    | MBE -14.5 (-<br>1.7 %) | MBE 56.2<br>(6.5 %)    | MBE 147.3<br>(17.1 %)  | MBE 9.2<br>(1.1 %)     | MBE 13.2<br>(1.5 %)    | MBE -49.5 (-<br>5.7 %) | MBE 18.3<br>(2.1 %)    | MBE 105.7<br>(12.2 %)  | MBE -27.3 (-<br>3.2 %) | MBE -14.5<br>(-1.7 %)  | MBE -24.3 (-<br>2.8 %) |
| NBDATA: 31397   | STD 123.2<br>(14.3 %)  | STD 143.2<br>(16.6 %)  | STD 181.5<br>(21.0 %)  | STD 132.2<br>(15.3 %)  | STD 124.4<br>(14.4 %)  | STD 118.6<br>(13.7 %)  | STD 126.9<br>(14.7 %)  | STD 153.6<br>(17.8 %)  | STD 119.9<br>(13.9 %)  | STD 114.9<br>(13.3 %)  | STD 129.5<br>(15.0 %)  |
| MEANREF: 863.1  | RMSE 124.1<br>(14.4 %) | RMSE 153.8<br>(17.8 %) | RMSE 233.8<br>(27.1 %) | RMSE 132.5<br>(15.4 %) | RMSE 125.1<br>(14.5 %) | RMSE 128.5<br>(14.9 %) | RMSE 128.2<br>(14.9 %) | RMSE 186.4<br>(21.6 %) | RMSE 123.0<br>(14.2 %) | RMSE 115.8<br>(13.4 %) | RMSE 131.7<br>(15.3 %) |
|                 | CC 0.972               | CC 0.972               | CC 0.972               | CC 0.972               | CC 0.976               | CC 0.971               | CC 0.971               | CC 0.971               | CC 0.972               | CC 0.975               | CC 0.967               |
| Czech_BKF_ST    | MBE -1.2 (-<br>0.1 %)  | MBE 78.0<br>(8.2 %)    | MBE 179.9<br>(18.9 %)  | MBE 24.7<br>(2.6 %)    | MBE 29.0<br>(3.1 %)    | MBE -43.8 (-<br>4.6 %) | MBE 31.8<br>(3.3 %)    | MBE 129.2<br>(13.6 %)  | MBE -19.6 (-<br>2.1 %) | MBE -5.2 (-<br>0.5 %)  | MBE -16.8 (-<br>1.8 %) |
| NBDATA: 28517   | STD 131.2<br>(13.8 %)  | STD 146.7<br>(15.4 %)  | STD 177.8<br>(18.7 %)  | STD 138.7<br>(14.6 %)  | STD 130.0<br>(13.7 %)  | STD 127.8<br>(13.4 %)  | STD 134.5<br>(14.2 %)  | STD 156.0<br>(16.4 %)  | STD 128.9<br>(13.6 %)  | STD 123.3<br>(13.0 %)  | STD 140.0<br>(14.7 %)  |
| MEANREF: 950.5  | RMSE 131.3<br>(13.8 %) | RMSE 166.2<br>(17.5 %) | RMSE 253.0<br>(26.6 %) | RMSE 140.9<br>(14.8 %) | RMSE 133.2<br>(14.0 %) | RMSE 135.1<br>(14.2 %) | RMSE 138.2<br>(14.5 %) | RMSE 202.5<br>(21.3 %) | RMSE 130.3<br>(13.7 %) | RMSE 123.4<br>(13.0 %) | RMSE 141.0<br>(14.8 %) |
|                 | CC 0.960               | CC 0.960               | CC 0.960               | CC 0.961               | CC 0.965               | CC 0.960               | CC 0.960               | CC 0.960               | CC 0.961               | CC 0.965               | CC 0.952               |
| Czech_BKG       | MBE -1.2 (-<br>0.1 %)  | MBE 77.4<br>(8.2 %)    | MBE 178.5<br>(18.9 %)  | MBE 25.4<br>(2.7 %)    | MBE 27.5<br>(2.9 %)    | MBE -44.9 (-<br>4.8 %) | MBE 30.1<br>(3.2 %)    | MBE 126.6<br>(13.4 %)  | MBE -19.8 (-<br>2.1 %) | MBE -5.3 (-<br>0.6 %)  | MBE -13.1 (-<br>1.4 %) |
| NBDATA: 27783   | STD 148.4<br>(15.7 %)  | STD 165.2<br>(17.5 %)  | STD 197.0<br>(20.9 %)  | STD 155.5<br>(16.5 %)  | STD 144.8<br>(15.3 %)  | STD 131.9<br>(14.0 %)  | STD 140.0<br>(14.8 %)  | STD 162.9<br>(17.3 %)  | STD 133.3<br>(14.1 %)  | STD 126.9<br>(13.4 %)  | STD 143.1<br>(15.2 %)  |
| MEANREF: 943.8  | RMSE 148.4<br>(15.7 %) | RMSE 182.4<br>(19.3 %) | RMSE 265.9<br>(28.2 %) | RMSE 157.5<br>(16.7 %) | RMSE 147.4<br>(15.6 %) | RMSE 139.3<br>(14.8 %) | RMSE 143.2<br>(15.2 %) | RMSE 206.3<br>(21.9 %) | RMSE 134.7<br>(14.3 %) | RMSE 127.0<br>(13.5 %) | RMSE 143.7<br>(15.2 %) |
|                 | CC 0.951               | CC 0.951               | CC 0.951               | CC 0.952               | CC 0.958               | CC 0.958               | CC 0.958               | CC 0.958               | CC 0.959               | CC 0.964               | CC 0.952               |
| Czech_KRP       | MBE -37.4 (-<br>4.4 %) | MBE 30.7<br>(3.6 %)    | MBE 118.4<br>(13.9 %)  | MBE -12.5<br>(-1.5 %)  | MBE -3.1 (-<br>0.4 %)  | MBE -42.3 (-<br>4.9 %) | MBE 25.4<br>(3.0 %)    | MBE 112.6<br>(13.2 %)  | MBE -18.1 (-<br>2.1 %) | MBE -4.9 (-<br>0.6 %)  | MBE 8.8<br>(1.0 %)     |
| NBDATA: 24063   | STD 134.5<br>(15.8 %)  | STD 145.7<br>(17.1 %)  | STD 173.8<br>(20.4 %)  | STD 138.4<br>(16.2 %)  | STD 132.6<br>(15.5 %)  | STD 108.0<br>(12.6 %)  | STD 113.4<br>(13.3 %)  | STD 138.1<br>(16.2 %)  | STD 107.6<br>(12.6 %)  | STD 102.8<br>(12.0 %)  | STD 122.7<br>(14.4 %)  |
| MEANREF: 854.1  | RMSE 139.6<br>(16.3 %) | RMSE 148.9<br>(17.4 %) | RMSE 210.3<br>(24.6 %) | RMSE 139.0<br>(16.3 %) | RMSE 132.7<br>(15.5 %) | RMSE 116.0<br>(13.6 %) | RMSE 116.3<br>(13.6 %) | RMSE 178.1<br>(20.9 %) | RMSE 109.1<br>(12.8 %) | RMSE 102.9<br>(12.0 %) | RMSE 123.0<br>(14.4 %) |

|                |                     |                     |                     |                     |                     |                     |                     |                     |                     |                     |                     |
|----------------|---------------------|---------------------|---------------------|---------------------|---------------------|---------------------|---------------------|---------------------|---------------------|---------------------|---------------------|
|                | CC 0.963            | CC 0.963            | CC 0.963            | CC 0.964            | CC 0.967            | CC 0.976            | CC 0.976            | CC 0.976            | CC 0.977            | CC 0.979            | CC 0.970            |
| Czech_LNZ      | MBE -18.1 (-2.1 %)  | MBE 51.8 (6.0 %)    | MBE 141.8 (16.6 %)  | MBE 13.4 (1.6 %)    | MBE 18.3 (2.1 %)    | MBE -30.2 (-3.5 %)  | MBE 38.8 (4.5 %)    | MBE 127.5 (14.9 %)  | MBE 0.5 (0.1 %)     | MBE 12.0 (1.4 %)    | MBE 32.8 (3.8 %)    |
| NBDATA: 22789  | STD 107.1 (12.5 %)  | STD 125.2 (14.6 %)  | STD 162.5 (19.0 %)  | STD 115.4 (13.5 %)  | STD 110.1 (12.8 %)  | STD 88.8 (10.4 %)   | STD 100.6 (11.7 %)  | STD 134.0 (15.6 %)  | STD 92.4 (10.8 %)   | STD 90.4 (10.5 %)   | STD 98.0 (11.4 %)   |
| MEANREF: 856.9 | RMSE 108.6 (12.7 %) | RMSE 135.5 (15.8 %) | RMSE 215.7 (25.2 %) | RMSE 116.2 (13.6 %) | RMSE 111.6 (13.0 %) | RMSE 93.8 (10.9 %)  | RMSE 107.8 (12.6 %) | RMSE 185.0 (21.6 %) | RMSE 92.4 (10.8 %)  | RMSE 91.2 (10.6 %)  | RMSE 103.3 (12.1 %) |
|                | CC 0.978            | CC 0.978            | CC 0.978            | CC 0.979            | CC 0.981            | CC 0.984            | CC 0.984            | CC 0.984            | CC 0.985            | CC 0.987            | CC 0.983            |
| Czech_RAJ      | MBE -25.0 (-2.8 %)  | MBE 46.2 (5.3 %)    | MBE 137.9 (15.7 %)  | MBE 2.2 (0.3 %)     | MBE 2.5 (0.3 %)     | MBE -57.5 (-6.5 %)  | MBE 11.0 (1.2 %)    | MBE 99.2 (11.3 %)   | MBE -31.8 (-3.6 %)  | MBE -18.8 (-2.1 %)  | MBE -15.0 (-1.7 %)  |
| NBDATA: 29384  | STD 127.5 (14.5 %)  | STD 142.1 (16.2 %)  | STD 174.8 (19.9 %)  | STD 133.5 (15.2 %)  | STD 123.7 (14.1 %)  | STD 108.1 (12.3 %)  | STD 112.9 (12.8 %)  | STD 137.3 (15.6 %)  | STD 107.6 (12.2 %)  | STD 102.7 (11.7 %)  | STD 126.8 (14.4 %)  |
| MEANREF: 879.2 | RMSE 129.9 (14.8 %) | RMSE 149.4 (17.0 %) | RMSE 222.7 (25.3 %) | RMSE 133.5 (15.2 %) | RMSE 123.8 (14.1 %) | RMSE 122.5 (13.9 %) | RMSE 113.5 (12.9 %) | RMSE 169.4 (19.3 %) | RMSE 112.2 (12.8 %) | RMSE 104.4 (11.9 %) | RMSE 127.7 (14.5 %) |
|                | CC 0.968            | CC 0.968            | CC 0.968            | CC 0.969            | CC 0.973            | CC 0.976            | CC 0.976            | CC 0.976            | CC 0.977            | CC 0.980            | CC 0.968            |
| Czech_STI      | MBE -36.5 (-4.2 %)  | MBE 33.3 (3.8 %)    | MBE 123.1 (14.1 %)  | MBE -9.9 (-1.1 %)   | MBE -5.1 (-0.6 %)   | MBE -50.9 (-5.8 %)  | MBE 17.7 (2.0 %)    | MBE 106.0 (12.1 %)  | MBE -25.3 (-2.9 %)  | MBE -13.0 (-1.5 %)  | MBE -11.6 (-1.3 %)  |
| NBDATA: 39175  | STD 123.5 (14.1 %)  | STD 140.5 (16.1 %)  | STD 175.9 (20.1 %)  | STD 131.0 (15.0 %)  | STD 124.7 (14.3 %)  | STD 100.7 (11.5 %)  | STD 109.5 (12.5 %)  | STD 139.0 (15.9 %)  | STD 103.0 (11.8 %)  | STD 99.6 (11.4 %)   | STD 127.3 (14.6 %)  |
| MEANREF: 873.6 | RMSE 128.8 (14.7 %) | RMSE 144.4 (16.5 %) | RMSE 214.8 (24.6 %) | RMSE 131.4 (15.0 %) | RMSE 124.8 (14.3 %) | RMSE 112.8 (12.9 %) | RMSE 110.9 (12.7 %) | RMSE 174.8 (20.0 %) | RMSE 106.0 (12.1 %) | RMSE 100.5 (11.5 %) | RMSE 127.9 (14.6 %) |
|                | CC 0.971            | CC 0.971            | CC 0.971            | CC 0.972            | CC 0.974            | CC 0.979            | CC 0.979            | CC 0.979            | CC 0.980            | CC 0.982            | CC 0.968            |
| Czech_TRE      | MBE -33.9 (-3.7 %)  | MBE 38.8 (4.3 %)    | MBE 132.3 (14.6 %)  | MBE -4.2 (-0.5 %)   | MBE 3.1 (0.3 %)     | MBE -54.0 (-6.0 %)  | MBE 17.0 (1.9 %)    | MBE 108.3 (12.0 %)  | MBE -25.5 (-2.8 %)  | MBE -12.5 (-1.4 %)  | MBE -1.1 (-0.1 %)   |
| NBDATA: 44438  | STD 123.2 (13.6 %)  | STD 140.2 (15.5 %)  | STD 175.1 (19.3 %)  | STD 130.8 (14.5 %)  | STD 125.4 (13.9 %)  | STD 109.6 (12.1 %)  | STD 118.5 (13.1 %)  | STD 146.2 (16.2 %)  | STD 111.4 (12.3 %)  | STD 107.2 (11.8 %)  | STD 134.4 (14.9 %)  |
| MEANREF: 905.1 | RMSE 127.7 (14.1 %) | RMSE 145.4 (16.1 %) | RMSE 219.5 (24.2 %) | RMSE 130.9 (14.5 %) | RMSE 125.4 (13.9 %) | RMSE 122.2 (13.5 %) | RMSE 119.7 (13.2 %) | RMSE 182.0 (20.1 %) | RMSE 114.3 (12.6 %) | RMSE 107.9 (11.9 %) | RMSE 134.4 (14.9 %) |
|                | CC 0.970            | CC 0.970            | CC 0.970            | CC 0.971            | CC 0.974            | CC 0.975            | CC 0.975            | CC 0.975            | CC 0.976            | CC 0.978            | CC 0.964            |
| EFDC_DE-Hai    | MBE -62.4 (-6.8 %)  | MBE 8.6 (0.9 %)     | MBE 100.2 (10.9 %)  | MBE -35.5 (-3.9 %)  | MBE -28.1 (-3.1 %)  | MBE -76.7 (-8.4 %)  | MBE -6.8 (-0.7 %)   | MBE 83.1 (9.1 %)    | MBE -50.5 (-5.5 %)  | MBE -36.2 (-4.0 %)  | MBE -22.8 (-2.5 %)  |
| NBDATA: 43855  | STD 153.4 (16.8 %)  | STD 162.4 (17.7 %)  | STD 187.5 (20.5 %)  | STD 154.6 (16.9 %)  | STD 146.5 (16.0 %)  | STD 122.2 (13.4 %)  | STD 124.0 (13.6 %)  | STD 143.7 (15.7 %)  | STD 118.3 (12.9 %)  | STD 111.4 (12.2 %)  | STD 134.9 (14.7 %)  |
| MEANREF: 915.1 | RMSE 165.6 (18.1 %) | RMSE 162.6 (17.8 %) | RMSE 212.6 (23.2 %) | RMSE 158.6 (17.3 %) | RMSE 149.1 (16.3 %) | RMSE 144.3 (15.8 %) | RMSE 124.2 (13.6 %) | RMSE 166.0 (18.1 %) | RMSE 128.6 (14.1 %) | RMSE 117.1 (12.8 %) | RMSE 136.8 (15.0 %) |
|                | CC 0.954            | CC 0.954            | CC 0.954            | CC 0.955            | CC 0.960            | CC 0.971            | CC 0.971            | CC 0.971            | CC 0.973            | CC 0.976            | CC 0.965            |
| EFDC_FR-Aur    | MBE -88.7 (-8.9 %)  | MBE -12.8 (-1.3 %)  | MBE 84.8 (8.5 %)    | MBE -52.3 (-5.2 %)  | MBE -39.7 (-4.0 %)  | MBE -96.1 (-9.6 %)  | MBE -20.8 (-2.1 %)  | MBE 76.0 (7.6 %)    | MBE -60.1 (-6.0 %)  | MBE -47.0 (-4.7 %)  | MBE -29.7 (-3.0 %)  |



|                 |                         |                        |                        |                        |                        |                         |                        |                        |                         |                        |                        |
|-----------------|-------------------------|------------------------|------------------------|------------------------|------------------------|-------------------------|------------------------|------------------------|-------------------------|------------------------|------------------------|
| NBDATA: 62325   | STD 109.8<br>(11.0 %)   | STD 109.4<br>(11.0 %)  | STD 131.7<br>(13.2 %)  | STD 105.8<br>(10.6 %)  | STD 102.2<br>(10.2 %)  | STD 105.2<br>(10.5 %)   | STD 101.6<br>(10.2 %)  | STD 121.5<br>(12.2 %)  | STD 99.2<br>(9.9 %)     | STD 94.7<br>(9.5 %)    | STD 117.1<br>(11.7 %)  |
| MEANREF: 998.5  | RMSE 141.2<br>(14.1 %)  | RMSE 110.1<br>(11.0 %) | RMSE 156.7<br>(15.7 %) | RMSE 118.0<br>(11.8 %) | RMSE 109.7<br>(11.0 %) | RMSE 142.5<br>(14.3 %)  | RMSE 103.7<br>(10.4 %) | RMSE 143.3<br>(14.4 %) | RMSE 116.0<br>(11.6 %)  | RMSE 105.7<br>(10.6 %) | RMSE 120.8<br>(12.1 %) |
|                 | CC 0.981                | CC 0.981               | CC 0.981               | CC 0.982               | CC 0.983               | CC 0.983                | CC 0.983               | CC 0.983               | CC 0.984                | CC 0.985               | CC 0.977               |
| EFDC_FR-Pue     | MBE -88.4 (-<br>9.0 %)  | MBE -13.9<br>(-1.4 %)  | MBE 82.0<br>(8.4 %)    | MBE -56.3<br>(-5.7 %)  | MBE -44.5<br>(-4.5 %)  | MBE -80.7 (-<br>8.2 %)  | MBE -5.5 (-<br>0.6 %)  | MBE 91.2<br>(9.3 %)    | MBE -48.5 (-<br>4.9 %)  | MBE -37.1<br>(-3.8 %)  | MBE -23.7 (-<br>2.4 %) |
| NBDATA: 66555   | STD 99.7<br>(10.2 %)    | STD 102.5<br>(10.4 %)  | STD 129.4<br>(13.2 %)  | STD 96.2<br>(9.8 %)    | STD 95.0<br>(9.7 %)    | STD 99.8<br>(10.2 %)    | STD 103.3<br>(10.5 %)  | STD 130.8<br>(13.3 %)  | STD 97.4<br>(9.9 %)     | STD 95.3<br>(9.7 %)    | STD 108.2<br>(11.0 %)  |
| MEANREF: 982.1  | RMSE 133.3<br>(13.6 %)  | RMSE 103.4<br>(10.5 %) | RMSE 153.2<br>(15.6 %) | RMSE 111.5<br>(11.4 %) | RMSE 104.9<br>(10.7 %) | RMSE 128.3<br>(13.1 %)  | RMSE 103.4<br>(10.5 %) | RMSE 159.5<br>(16.2 %) | RMSE 108.8<br>(11.1 %)  | RMSE 102.3<br>(10.4 %) | RMSE 110.7<br>(11.3 %) |
|                 | CC 0.983                | CC 0.983               | CC 0.983               | CC 0.984               | CC 0.985               | CC 0.983                | CC 0.983               | CC 0.983               | CC 0.984                | CC 0.985               | CC 0.980               |
| EFDC_GF-Guy     | MBE -100.6<br>(-8.9 %)  | MBE -15.0<br>(-1.3 %)  | MBE 95.1<br>(8.4 %)    | MBE 3.1<br>(0.3 %)     | MBE 19.2<br>(1.7 %)    | MBE -70.9 (-<br>6.3 %)  | MBE 17.2<br>(1.5 %)    | MBE 130.5<br>(11.6 %)  | MBE 35.7<br>(3.2 %)     | MBE 49.2<br>(4.4 %)    | MBE 28.7<br>(2.6 %)    |
| NBDATA: 22375   | STD 158.1<br>(14.0 %)   | STD 172.6<br>(15.3 %)  | STD 208.0<br>(18.5 %)  | STD 175.7<br>(15.6 %)  | STD 173.8<br>(15.4 %)  | STD 142.5<br>(12.6 %)   | STD 158.6<br>(14.1 %)  | STD 197.0<br>(17.5 %)  | STD 160.9<br>(14.3 %)   | STD 154.9<br>(13.7 %)  | STD 180.7<br>(16.0 %)  |
| MEANREF: 1126.8 | RMSE 187.4<br>(16.6 %)  | RMSE 173.3<br>(15.4 %) | RMSE 228.7<br>(20.3 %) | RMSE 175.8<br>(15.6 %) | RMSE 174.9<br>(15.5 %) | RMSE 159.1<br>(14.1 %)  | RMSE 159.5<br>(14.2 %) | RMSE 236.3<br>(21.0 %) | RMSE 164.8<br>(14.6 %)  | RMSE 162.5<br>(14.4 %) | RMSE 182.9<br>(16.2 %) |
|                 | CC 0.965                | CC 0.965               | CC 0.965               | CC 0.965               | CC 0.967               | CC 0.972                | CC 0.972               | CC 0.972               | CC 0.972                | CC 0.975               | CC 0.964               |
| EFDC_IE-Dri     | MBE -105.2<br>(-13.1 %) | MBE -47.0<br>(-5.9 %)  | MBE 27.9<br>(3.5 %)    | MBE -87.1<br>(-10.8 %) | MBE -74.3<br>(-9.2 %)  | MBE -100.2<br>(-12.5 %) | MBE -41.5<br>(-5.2 %)  | MBE 34.0<br>(4.2 %)    | MBE -82.2 (-<br>10.2 %) | MBE -69.0<br>(-8.6 %)  | MBE -61.3 (-<br>7.6 %) |
| NBDATA: 12943   | STD 138.9<br>(17.3 %)   | STD 141.6<br>(17.6 %)  | STD 160.4<br>(20.0 %)  | STD 136.2<br>(17.0 %)  | STD 131.2<br>(16.3 %)  | STD 130.0<br>(16.2 %)   | STD 128.1<br>(15.9 %)  | STD 142.2<br>(17.7 %)  | STD 125.2<br>(15.6 %)   | STD 118.6<br>(14.8 %)  | STD 148.1<br>(18.4 %)  |
| MEANREF: 803.4  | RMSE 174.2<br>(21.7 %)  | RMSE 149.2<br>(18.6 %) | RMSE 162.8<br>(20.3 %) | RMSE 161.7<br>(20.1 %) | RMSE 150.8<br>(18.8 %) | RMSE 164.1<br>(20.4 %)  | RMSE 134.6<br>(16.8 %) | RMSE 146.2<br>(18.2 %) | RMSE 149.8<br>(18.6 %)  | RMSE 137.2<br>(17.1 %) | RMSE 160.3<br>(20.0 %) |
|                 | CC 0.962                | CC 0.962               | CC 0.962               | CC 0.964               | CC 0.967               | CC 0.968                | CC 0.968               | CC 0.968               | CC 0.969                | CC 0.972               | CC 0.957               |
| EFDC_IL-Yat     | MBE -58.2 (-<br>5.4 %)  | MBE 27.5<br>(2.5 %)    | MBE 137.7<br>(12.7 %)  | MBE -29.0<br>(-2.7 %)  | MBE -15.5<br>(-1.4 %)  | MBE -65.4 (-<br>6.0 %)  | MBE 19.6<br>(1.8 %)    | MBE 129.2<br>(11.9 %)  | MBE -36.5 (-<br>3.4 %)  | MBE -22.9<br>(-2.1 %)  | MBE 29.1<br>(2.7 %)    |
| NBDATA: 87497   | STD 92.5<br>(8.5 %)     | STD 107.1<br>(9.9 %)   | STD 149.1<br>(13.7 %)  | STD 95.6<br>(8.8 %)    | STD 95.0<br>(8.8 %)    | STD 107.4<br>(9.9 %)    | STD 115.7<br>(10.7 %)  | STD 150.0<br>(13.8 %)  | STD 107.4<br>(9.9 %)    | STD 101.7<br>(9.4 %)   | STD 98.7<br>(9.1 %)    |
| MEANREF: 1085.5 | RMSE 109.3<br>(10.1 %)  | RMSE 110.6<br>(10.2 %) | RMSE 203.0<br>(18.7 %) | RMSE 99.9<br>(9.2 %)   | RMSE 96.3<br>(8.9 %)   | RMSE 125.8<br>(11.6 %)  | RMSE 117.4<br>(10.8 %) | RMSE 197.9<br>(18.2 %) | RMSE 113.5<br>(10.5 %)  | RMSE 104.3<br>(9.6 %)  | RMSE 102.9<br>(9.5 %)  |
|                 | CC 0.988                | CC 0.988               | CC 0.988               | CC 0.988               | CC 0.988               | CC 0.983                | CC 0.983               | CC 0.983               | CC 0.983                | CC 0.986               | CC 0.987               |
| EFDC_IT-Bci     | MBE -31.2 (-<br>3.1 %)  | MBE 49.5<br>(5.0 %)    | MBE 153.3<br>(15.4 %)  | MBE 11.6<br>(1.2 %)    | MBE 23.9<br>(2.4 %)    | MBE -21.6 (-<br>2.2 %)  | MBE 59.9<br>(6.0 %)    | MBE 164.8<br>(16.5 %)  | MBE 21.6<br>(2.2 %)     | MBE 32.9<br>(3.3 %)    | MBE 56.3<br>(5.6 %)    |
| NBDATA: 48066   | STD 108.7<br>(10.9 %)   | STD 125.1<br>(12.5 %)  | STD 162.5<br>(16.3 %)  | STD 116.8<br>(11.7 %)  | STD 116.7<br>(11.7 %)  | STD 106.0<br>(10.6 %)   | STD 124.8<br>(12.5 %)  | STD 164.6<br>(16.5 %)  | STD 117.0<br>(11.7 %)   | STD 115.3<br>(11.5 %)  | STD 129.8<br>(13.0 %)  |
| MEANREF: 998.4  | RMSE 113.1<br>(11.3 %)  | RMSE 134.6<br>(13.5 %) | RMSE 223.4<br>(22.4 %) | RMSE 117.4<br>(11.8 %) | RMSE 119.1<br>(11.9 %) | RMSE 108.1<br>(10.8 %)  | RMSE 138.4<br>(13.9 %) | RMSE 232.9<br>(23.3 %) | RMSE 118.9<br>(11.9 %)  | RMSE 119.9<br>(12.0 %) | RMSE 141.5<br>(14.2 %) |

|                 |                     |                     |                     |                     |                     |                      |                     |                     |                     |                     |                     |
|-----------------|---------------------|---------------------|---------------------|---------------------|---------------------|----------------------|---------------------|---------------------|---------------------|---------------------|---------------------|
|                 | CC 0.979            | CC 0.979            | CC 0.979            | CC 0.980            | CC 0.981            | CC 0.980             | CC 0.980            | CC 0.980            | CC 0.981            | CC 0.982            | CC 0.975            |
| EFDC_IT-Noe     | MBE -27.1 (-2.7 %)  | MBE 55.1 (5.4 %)    | MBE 161.1 (15.9 %)  | MBE 19.1 (1.9 %)    | MBE 28.3 (2.8 %)    | MBE -36.1 (-3.6 %)   | MBE 45.4 (4.5 %)    | MBE 150.4 (14.8 %)  | MBE 9.7 (1.0 %)     | MBE 19.6 (1.9 %)    | MBE 39.9 (3.9 %)    |
| NBDATA: 23861   | STD 76.9 (7.6 %)    | STD 101.3 (10.0 %)  | STD 147.7 (14.6 %)  | STD 90.8 (9.0 %)    | STD 91.7 (9.0 %)    | STD 76.6 (7.6 %)     | STD 100.0 (9.9 %)   | STD 145.8 (14.4 %)  | STD 90.2 (8.9 %)    | STD 90.4 (8.9 %)    | STD 101.3 (10.0 %)  |
| MEANREF: 1014.1 | RMSE 81.5 (8.0 %)   | RMSE 115.3 (11.4 %) | RMSE 218.5 (21.5 %) | RMSE 92.8 (9.2 %)   | RMSE 96.0 (9.5 %)   | RMSE 84.7 (8.3 %)    | RMSE 109.9 (10.8 %) | RMSE 209.5 (20.7 %) | RMSE 90.7 (8.9 %)   | RMSE 92.5 (9.1 %)   | RMSE 108.9 (10.7 %) |
|                 | CC 0.990            | CC 0.990            | CC 0.990            | CC 0.990            | CC 0.991            | CC 0.990             | CC 0.990            | CC 0.990            | CC 0.990            | CC 0.991            | CC 0.985            |
| EFDC_RU-Fyo     | MBE -40.6 (-5.2 %)  | MBE 20.6 (2.7 %)    | MBE 99.4 (12.8 %)   | MBE -20.7 (-2.7 %)  | MBE -9.5 (-1.2 %)   | MBE -78.4 (-10.2 %)  | MBE -21.0 (-2.7 %)  | MBE 52.9 (6.9 %)    | MBE -60.7 (-7.9 %)  | MBE -47.5 (-6.2 %)  | MBE -16.9 (-2.2 %)  |
| NBDATA: 38110   | STD 134.6 (17.4 %)  | STD 151.1 (19.5 %)  | STD 183.1 (23.6 %)  | STD 143.5 (18.5 %)  | STD 139.7 (18.0 %)  | STD 141.2 (18.4 %)   | STD 146.3 (19.1 %)  | STD 164.8 (21.5 %)  | STD 142.6 (18.6 %)  | STD 135.6 (17.7 %)  | STD 135.3 (17.7 %)  |
| MEANREF: 774.7  | RMSE 140.6 (18.1 %) | RMSE 152.5 (19.7 %) | RMSE 208.4 (26.9 %) | RMSE 145.0 (18.7 %) | RMSE 140.0 (18.1 %) | RMSE 161.5 (21.1 %)  | RMSE 147.8 (19.3 %) | RMSE 173.1 (22.6 %) | RMSE 155.0 (20.2 %) | RMSE 143.7 (18.7 %) | RMSE 136.4 (17.8 %) |
|                 | CC 0.959            | CC 0.959            | CC 0.959            | CC 0.959            | CC 0.963            | CC 0.951             | CC 0.951            | CC 0.951            | CC 0.951            | CC 0.957            | CC 0.959            |
| EFDC_UK-Amo     | MBE -81.3 (-11.1 %) | MBE -26.8 (-3.6 %)  | MBE 43.5 (5.9 %)    | MBE -65.8 (-8.9 %)  | MBE -52.1 (-7.1 %)  | MBE -97.7 (-13.6 %)  | MBE -45.9 (-6.4 %)  | MBE 20.9 (2.9 %)    | MBE -83.9 (-11.7 %) | MBE -69.6 (-9.7 %)  | MBE -60.2 (-8.4 %)  |
| NBDATA: 18580   | STD 165.2 (22.5 %)  | STD 174.7 (23.7 %)  | STD 196.8 (26.8 %)  | STD 166.1 (22.6 %)  | STD 156.8 (21.3 %)  | STD 161.3 (22.4 %)   | STD 164.3 (22.8 %)  | STD 178.5 (24.8 %)  | STD 158.7 (22.1 %)  | STD 148.4 (20.6 %)  | STD 172.9 (24.0 %)  |
| MEANREF: 735.6  | RMSE 184.1 (25.0 %) | RMSE 176.7 (24.0 %) | RMSE 201.5 (27.4 %) | RMSE 178.6 (24.3 %) | RMSE 165.2 (22.5 %) | RMSE 188.6 (26.2 %)  | RMSE 170.5 (23.7 %) | RMSE 179.7 (25.0 %) | RMSE 179.5 (24.9 %) | RMSE 163.9 (22.8 %) | RMSE 183.1 (25.4 %) |
|                 | CC 0.933            | CC 0.933            | CC 0.933            | CC 0.935            | CC 0.943            | CC 0.935             | CC 0.935            | CC 0.935            | CC 0.938            | CC 0.946            | CC 0.928            |
| EFDC_ZA-Kru     | MBE -95.7 (-7.8 %)  | MBE -1.7 (-0.1 %)   | MBE 119.3 (9.8 %)   | MBE -34.7 (-2.8 %)  | MBE -18.9 (-1.5 %)  | MBE -66.4 (-5.4 %)   | MBE 30.0 (2.5 %)    | MBE 154.2 (12.6 %)  | MBE -3.7 (-0.3 %)   | MBE 10.1 (0.8 %)    | MBE 30.9 (2.5 %)    |
| NBDATA: 2167    | STD 105.9 (8.7 %)   | STD 110.7 (9.0 %)   | STD 139.6 (11.4 %)  | STD 99.3 (8.1 %)    | STD 98.6 (8.1 %)    | STD 101.3 (8.3 %)    | STD 112.3 (9.2 %)   | STD 147.9 (12.1 %)  | STD 102.3 (8.4 %)   | STD 99.7 (8.2 %)    | STD 107.0 (8.7 %)   |
| MEANREF: 1223.2 | RMSE 142.8 (11.7 %) | RMSE 110.7 (9.0 %)  | RMSE 183.7 (15.0 %) | RMSE 105.2 (8.6 %)  | RMSE 100.4 (8.2 %)  | RMSE 121.2 (9.9 %)   | RMSE 116.3 (9.5 %)  | RMSE 213.7 (17.5 %) | RMSE 102.3 (8.4 %)  | RMSE 100.2 (8.2 %)  | RMSE 111.3 (9.1 %)  |
|                 | CC 0.982            | CC 0.982            | CC 0.982            | CC 0.985            | CC 0.986            | CC 0.983             | CC 0.983            | CC 0.983            | CC 0.986            | CC 0.987            | CC 0.984            |
| Kishinev        | MBE -97.2 (-10.1 %) | MBE -25.3 (-2.6 %)  | MBE 67.2 (7.0 %)    | MBE -64.1 (-6.7 %)  | MBE -52.2 (-5.4 %)  | MBE -110.1 (-11.5 %) | MBE -39.2 (-4.1 %)  | MBE 51.9 (5.4 %)    | MBE -77.8 (-8.1 %)  | MBE -63.8 (-6.6 %)  | MBE -49.2 (-5.1 %)  |
| NBDATA: 73088   | STD 129.3 (13.5 %)  | STD 132.6 (13.8 %)  | STD 155.7 (16.2 %)  | STD 128.1 (13.3 %)  | STD 120.8 (12.6 %)  | STD 117.4 (12.2 %)   | STD 114.0 (11.9 %)  | STD 130.9 (13.6 %)  | STD 111.2 (11.6 %)  | STD 104.7 (10.9 %)  | STD 120.3 (12.5 %)  |
| MEANREF: 959.3  | RMSE 161.7 (16.9 %) | RMSE 135.0 (14.1 %) | RMSE 169.5 (17.7 %) | RMSE 143.2 (14.9 %) | RMSE 131.6 (13.7 %) | RMSE 160.9 (16.8 %)  | RMSE 120.6 (12.6 %) | RMSE 140.8 (14.7 %) | RMSE 135.7 (14.1 %) | RMSE 122.6 (12.8 %) | RMSE 130.0 (13.5 %) |
|                 | CC 0.972            | CC 0.972            | CC 0.972            | CC 0.973            | CC 0.976            | CC 0.978             | CC 0.978            | CC 0.978            | CC 0.979            | CC 0.981            | CC 0.975            |
| Lugo            | MBE -42.5 (-3.9 %)  | MBE 43.7 (4.1 %)    | MBE 154.6 (14.4 %)  | MBE 4.6 (0.4 %)     | MBE 14.4 (1.3 %)    | MBE -58.4 (-5.4 %)   | MBE 26.4 (2.5 %)    | MBE 135.6 (12.6 %)  | MBE -12.2 (-1.1 %)  | MBE 1.7 (0.2 %)     | MBE 7.9 (0.7 %)     |

|                           |                         |                        |                        |                        |                        |                        |                        |                        |                        |                        |                        |
|---------------------------|-------------------------|------------------------|------------------------|------------------------|------------------------|------------------------|------------------------|------------------------|------------------------|------------------------|------------------------|
| NBDATA: 3854              | STD 97.8<br>(9.1 %)     | STD 111.5<br>(10.4 %)  | STD 147.4<br>(13.7 %)  | STD 104.6<br>(9.7 %)   | STD 100.8<br>(9.4 %)   | STD 87.9<br>(8.2 %)    | STD 98.0<br>(9.1 %)    | STD 132.2<br>(12.3 %)  | STD 91.7<br>(8.5 %)    | STD 89.3<br>(8.3 %)    | STD 114.7<br>(10.7 %)  |
| MEANREF: 1075.8           | RMSE 106.6<br>(9.9 %)   | RMSE 119.7<br>(11.1 %) | RMSE 213.6<br>(19.9 %) | RMSE 104.7<br>(9.7 %)  | RMSE 101.8<br>(9.5 %)  | RMSE 105.6<br>(9.8 %)  | RMSE 101.5<br>(9.4 %)  | RMSE 189.4<br>(17.6 %) | RMSE 92.5<br>(8.6 %)   | RMSE 89.3<br>(8.3 %)   | RMSE 115.0<br>(10.7 %) |
|                           | CC 0.983                | CC 0.983               | CC 0.983               | CC 0.983               | CC 0.985               | CC 0.986               | CC 0.986               | CC 0.986               | CC 0.986               | CC 0.988               | CC 0.977               |
| PeronneSaintQuentin-tour2 | MBE -40.1 (-4.7 %)      | MBE 28.0<br>(3.3 %)    | MBE 115.6<br>(13.5 %)  | MBE -11.4<br>(-1.3 %)  | MBE 1.4<br>(0.2 %)     | MBE -47.0 (-5.5 %)     | MBE 20.5<br>(2.4 %)    | MBE 107.5<br>(12.5 %)  | MBE -18.8 (-2.2 %)     | MBE -5.4 (-0.6 %)      | MBE 30.9<br>(3.6 %)    |
| NBDATA: 18034             | STD 116.9<br>(13.6 %)   | STD 125.8<br>(14.7 %)  | STD 153.7<br>(17.9 %)  | STD 118.8<br>(13.9 %)  | STD 116.0<br>(13.5 %)  | STD 112.5<br>(13.1 %)  | STD 117.0<br>(13.6 %)  | STD 140.8<br>(16.4 %)  | STD 110.5<br>(12.9 %)  | STD 106.1<br>(12.4 %)  | STD 123.2<br>(14.4 %)  |
| MEANREF: 857.0            | RMSE 123.6<br>(14.4 %)  | RMSE 128.9<br>(15.0 %) | RMSE 192.3<br>(22.4 %) | RMSE 119.4<br>(13.9 %) | RMSE 116.0<br>(13.5 %) | RMSE 121.9<br>(14.2 %) | RMSE 118.8<br>(13.9 %) | RMSE 177.1<br>(20.7 %) | RMSE 112.1<br>(13.1 %) | RMSE 106.2<br>(12.4 %) | RMSE 127.0<br>(14.8 %) |
|                           | CC 0.973                | CC 0.973               | CC 0.973               | CC 0.974               | CC 0.976               | CC 0.975               | CC 0.975               | CC 0.975               | CC 0.976               | CC 0.979               | CC 0.971               |
| Pokola                    | MBE -148.1<br>(-12.1 %) | MBE -58.6<br>(-4.8 %)  | MBE 56.6<br>(4.6 %)    | MBE -53.7<br>(-4.4 %)  | MBE -37.7<br>(-3.1 %)  | MBE -79.4 (-6.5 %)     | MBE 15.8<br>(1.3 %)    | MBE 138.5<br>(11.3 %)  | MBE 20.9<br>(1.7 %)    | MBE 30.1<br>(2.5 %)    | MBE 54.5<br>(4.5 %)    |
| NBDATA: 5829              | STD 173.8<br>(14.2 %)   | STD 170.5<br>(14.0 %)  | STD 182.1<br>(14.9 %)  | STD 167.1<br>(13.7 %)  | STD 163.5<br>(13.4 %)  | STD 141.5<br>(11.6 %)  | STD 144.8<br>(11.9 %)  | STD 168.5<br>(13.8 %)  | STD 140.8<br>(11.5 %)  | STD 136.0<br>(11.1 %)  | STD 187.5<br>(15.3 %)  |
| MEANREF: 1221.5           | RMSE 228.4<br>(18.7 %)  | RMSE 180.3<br>(14.8 %) | RMSE 190.7<br>(15.6 %) | RMSE 175.5<br>(14.4 %) | RMSE 167.8<br>(13.7 %) | RMSE 162.3<br>(13.3 %) | RMSE 145.7<br>(11.9 %) | RMSE 218.1<br>(17.9 %) | RMSE 142.4<br>(11.7 %) | RMSE 139.3<br>(11.4 %) | RMSE 195.2<br>(16.0 %) |
|                           | CC 0.956                | CC 0.956               | CC 0.956               | CC 0.958               | CC 0.960               | CC 0.970               | CC 0.970               | CC 0.970               | CC 0.972               | CC 0.974               | CC 0.949               |
| Valenciennes              | MBE -77.0 (-8.8 %)      | MBE -10.3<br>(-1.2 %)  | MBE 75.6<br>(8.6 %)    | MBE -48.2<br>(-5.5 %)  | MBE -38.9<br>(-4.4 %)  | MBE -97.2 (-11.1 %)    | MBE -32.2<br>(-3.7 %)  | MBE 51.5<br>(5.9 %)    | MBE -69.5 (-7.9 %)     | MBE -56.4<br>(-6.4 %)  | MBE -21.8 (-2.5 %)     |
| NBDATA: 2897              | STD 103.6<br>(11.8 %)   | STD 108.6<br>(12.4 %)  | STD 135.1<br>(15.4 %)  | STD 102.1<br>(11.6 %)  | STD 97.9<br>(11.2 %)   | STD 100.8<br>(11.5 %)  | STD 96.5<br>(11.0 %)   | STD 113.5<br>(12.9 %)  | STD 93.0<br>(10.6 %)   | STD 87.6<br>(10.0 %)   | STD 106.1<br>(12.1 %)  |
| MEANREF: 876.8            | RMSE 129.0<br>(14.7 %)  | RMSE 109.1<br>(12.4 %) | RMSE 154.8<br>(17.7 %) | RMSE 112.9<br>(12.9 %) | RMSE 105.4<br>(12.0 %) | RMSE 140.0<br>(16.0 %) | RMSE 101.7<br>(11.6 %) | RMSE 124.6<br>(14.2 %) | RMSE 116.1<br>(13.2 %) | RMSE 104.2<br>(11.9 %) | RMSE 108.3<br>(12.4 %) |
|                           | CC 0.980                | CC 0.980               | CC 0.980               | CC 0.981               | CC 0.983               | CC 0.983               | CC 0.983               | CC 0.983               | CC 0.984               | CC 0.986               | CC 0.979               |
| Villaviciosa              | MBE -69.1 (-6.6 %)      | MBE 12.0<br>(1.2 %)    | MBE 116.3<br>(11.2 %)  | MBE -23.0<br>(-2.2 %)  | MBE -13.3<br>(-1.3 %)  | MBE -69.7 (-6.7 %)     | MBE 11.3<br>(1.1 %)    | MBE 115.6<br>(11.1 %)  | MBE -23.8 (-2.3 %)     | MBE -9.3 (-0.9 %)      | MBE -18.7 (-1.8 %)     |
| NBDATA: 4384              | STD 145.4<br>(14.0 %)   | STD 156.5<br>(15.0 %)  | STD 183.5<br>(17.6 %)  | STD 150.6<br>(14.5 %)  | STD 143.3<br>(13.8 %)  | STD 109.8<br>(10.5 %)  | STD 118.2<br>(11.3 %)  | STD 145.3<br>(14.0 %)  | STD 112.7<br>(10.8 %)  | STD 108.0<br>(10.4 %)  | STD 149.6<br>(14.4 %)  |
| MEANREF: 1041.1           | RMSE 160.9<br>(15.5 %)  | RMSE 156.9<br>(15.1 %) | RMSE 217.3<br>(20.9 %) | RMSE 152.4<br>(14.6 %) | RMSE 144.0<br>(13.8 %) | RMSE 130.1<br>(12.5 %) | RMSE 118.7<br>(11.4 %) | RMSE 185.7<br>(17.8 %) | RMSE 115.2<br>(11.1 %) | RMSE 108.4<br>(10.4 %) | RMSE 150.7<br>(14.5 %) |
|                           | CC 0.956                | CC 0.956               | CC 0.956               | CC 0.957               | CC 0.961               | CC 0.974               | CC 0.974               | CC 0.974               | CC 0.975               | CC 0.978               | CC 0.953               |
| Vitoria                   | MBE -68.0 (-6.3 %)      | MBE 16.9<br>(1.6 %)    | MBE 126.1<br>(11.6 %)  | MBE -24.6<br>(-2.3 %)  | MBE -11.2<br>(-1.0 %)  | MBE -79.3 (-7.3 %)     | MBE 4.6<br>(0.4 %)     | MBE 112.6<br>(10.4 %)  | MBE -36.6 (-3.4 %)     | MBE -23.3<br>(-2.1 %)  | MBE -13.1 (-1.2 %)     |
| NBDATA: 5016              | STD 90.0<br>(8.3 %)     | STD 99.7<br>(9.2 %)    | STD 133.1<br>(12.3 %)  | STD 93.8<br>(8.6 %)    | STD 93.7<br>(8.6 %)    | STD 88.7<br>(8.2 %)    | STD 97.7<br>(9.0 %)    | STD 130.7<br>(12.0 %)  | STD 91.5<br>(8.4 %)    | STD 90.0<br>(8.3 %)    | STD 113.7<br>(10.5 %)  |

|                 |                        |                       |                        |                       |                       |                        |                      |                        |                        |                       |                        |
|-----------------|------------------------|-----------------------|------------------------|-----------------------|-----------------------|------------------------|----------------------|------------------------|------------------------|-----------------------|------------------------|
| MEANREF: 1085.4 | RMSE 112.8<br>(10.4 %) | RMSE 101.1<br>(9.3 %) | RMSE 183.3<br>(16.9 %) | RMSE 97.0<br>(8.9 %)  | RMSE 94.4<br>(8.7 %)  | RMSE 119.0<br>(11.0 %) | RMSE 97.8<br>(9.0 %) | RMSE 172.5<br>(15.9 %) | RMSE 98.5<br>(9.1 %)   | RMSE 93.0<br>(8.6 %)  | RMSE 114.4<br>(10.5 %) |
|                 | CC 0.985               | CC 0.985              | CC 0.985               | CC 0.985              | CC 0.986              | CC 0.985               | CC 0.985             | CC 0.985               | CC 0.986               | CC 0.987              | CC 0.977               |
| Zaragoza        | MBE -67.7 (-<br>6.6 %) | MBE 12.7<br>(1.2 %)   | MBE 116.2<br>(11.3 %)  | MBE -25.3<br>(-2.5 %) | MBE -13.4<br>(-1.3 %) | MBE -55.4 (-<br>5.4 %) | MBE 26.0<br>(2.5 %)  | MBE 130.9<br>(12.7 %)  | MBE -12.6 (-<br>1.2 %) | MBE -1.4 (-<br>0.1 %) | MBE 22.1<br>(2.1 %)    |
| NBDATA: 7525    | STD 68.6<br>(6.6 %)    | STD 81.0<br>(7.8 %)   | STD 121.7<br>(11.8 %)  | STD 74.1<br>(7.2 %)   | STD 76.5<br>(7.4 %)   | STD 69.8<br>(6.8 %)    | STD 83.5<br>(8.1 %)  | STD 124.8<br>(12.1 %)  | STD 76.4<br>(7.4 %)    | STD 77.0<br>(7.5 %)   | STD 74.4<br>(7.2 %)    |
| MEANREF: 1032.1 | RMSE 96.4<br>(9.3 %)   | RMSE 82.0<br>(7.9 %)  | RMSE 168.2<br>(16.3 %) | RMSE 78.3<br>(7.6 %)  | RMSE 77.7<br>(7.5 %)  | RMSE 89.2<br>(8.6 %)   | RMSE 87.5<br>(8.5 %) | RMSE 180.9<br>(17.5 %) | RMSE 77.4<br>(7.5 %)   | RMSE 77.1<br>(7.5 %)  | RMSE 77.6<br>(7.5 %)   |
|                 | CC 0.992               | CC 0.992              | CC 0.992               | CC 0.992              | CC 0.992              | CC 0.992               | CC 0.992             | CC 0.992               | CC 0.992               | CC 0.992              | CC 0.992               |

---

*Table S2: Validation results for the comparison between the 11 methods to estimate PAR from satellite imagery at the 33 in-situ stations in cloud-free conditions (PAR CMF > 0.8)*

---

|                                                                                                                    |                                                                                                                      |                      |                       |                      |                       |                       |                         |                         |                       |                         |                       |
|--------------------------------------------------------------------------------------------------------------------|----------------------------------------------------------------------------------------------------------------------|----------------------|-----------------------|----------------------|-----------------------|-----------------------|-------------------------|-------------------------|-----------------------|-------------------------|-----------------------|
| # Quality assessment of 11 methods to derive 30-min PAR [400-700] nm from satellite imagery in overcast conditions |                                                                                                                      |                      |                       |                      |                       |                       |                         |                         |                       |                         |                       |
| # Author - date                                                                                                    | Dr Claire THOMAS – Date of generation of the results : June 2022                                                     |                      |                       |                      |                       |                       |                         |                         |                       |                         |                       |
| # Method 1 (M1)                                                                                                    | Jacovides (2004) from HC3 (coeff 1.919)                                                                              |                      |                       |                      |                       |                       |                         |                         |                       |                         |                       |
| # Method 2 (M2)                                                                                                    | Udo et Aro (1999) from HC3 (coeff 2.079)                                                                             |                      |                       |                      |                       |                       |                         |                         |                       |                         |                       |
| # Method 3 (M3)                                                                                                    | Szeicz (1974) from HC3 (coeff 2.285)                                                                                 |                      |                       |                      |                       |                       |                         |                         |                       |                         |                       |
| # Method 4 (M4)                                                                                                    | Weighted Kato with BB CMF from HC3                                                                                   |                      |                       |                      |                       |                       |                         |                         |                       |                         |                       |
| # Method 5 (M5)                                                                                                    | Weighted Kato with PAR CMF from HC3                                                                                  |                      |                       |                      |                       |                       |                         |                         |                       |                         |                       |
| # Method 6 (M6)                                                                                                    | Jacovides (2004) from CAMS (coeff 1.919)                                                                             |                      |                       |                      |                       |                       |                         |                         |                       |                         |                       |
| # Method 7 (M7)                                                                                                    | Udo et Aro (1999) from CAMS (coeff 2.079)                                                                            |                      |                       |                      |                       |                       |                         |                         |                       |                         |                       |
| # Method 8 (M8)                                                                                                    | Szeicz (1974) from CAMS (coeff 2.285)                                                                                |                      |                       |                      |                       |                       |                         |                         |                       |                         |                       |
| # Method 9 (M9)                                                                                                    | Weighted Kato with BB CMF from CAMS                                                                                  |                      |                       |                      |                       |                       |                         |                         |                       |                         |                       |
| # Method 10 (M10)                                                                                                  | Weighted Kato with PAR CMF from CAMS                                                                                 |                      |                       |                      |                       |                       |                         |                         |                       |                         |                       |
| # Method 11 (M11)                                                                                                  | DWD SARAH-3                                                                                                          |                      |                       |                      |                       |                       |                         |                         |                       |                         |                       |
| # MBE                                                                                                              | Bias in $\mu\text{mol}/\text{m}^2/\text{s}$ (relative bias in percent) - ideal 0                                     |                      |                       |                      |                       |                       |                         |                         |                       |                         |                       |
| # STD                                                                                                              | STandard Deviation in $\mu\text{mol}/\text{m}^2/\text{s}$ (relative standard deviation in percent) - ideal 0         |                      |                       |                      |                       |                       |                         |                         |                       |                         |                       |
| # RMSE                                                                                                             | Root Mean Square Error in $\mu\text{mol}/\text{m}^2/\text{s}$ (relative Root Mean Square Error in percent) - ideal 0 |                      |                       |                      |                       |                       |                         |                         |                       |                         |                       |
| # CC                                                                                                               | Correlation Coefficient - ideal 1                                                                                    |                      |                       |                      |                       |                       |                         |                         |                       |                         |                       |
| # Station                                                                                                          | M1                                                                                                                   | M2                   | M3                    | M4                   | M5                    | M6                    | M7                      | M8                      | M9                    | M10                     | M11                   |
| Aberystwyth_University                                                                                             | MBE 59.2<br>(35.9 %)                                                                                                 | MBE 77.9<br>(47.2 %) | MBE 102.0<br>(61.8 %) | MBE 71.5<br>(43.4 %) | MBE 107.7<br>(65.3 %) | MBE 86.9<br>(52.7 %)  | MBE 107.9<br>(65.4 %)   | MBE 134.9<br>(81.8 %)   | MBE 101.3<br>(61.4 %) | MBE 139.7<br>(84.7 %)   | MBE 97.9<br>(59.4 %)  |
| NBDATA: 9459                                                                                                       | STD 75.9<br>(46.0 %)                                                                                                 | STD 81.3<br>(49.3 %) | STD 89.1<br>(54.0 %)  | STD 79.6<br>(48.3 %) | STD 85.5<br>(51.9 %)  | STD 117.4<br>(71.2 %) | STD 130.5<br>(79.1 %)   | STD 147.9<br>(89.7 %)   | STD 127.9<br>(77.5 %) | STD 144.7<br>(87.8 %)   | STD 104.0<br>(63.0 %) |
| MEANREF: 164.9                                                                                                     | RMSE 96.3<br>(58.4 %)                                                                                                | RMSE 112.6 (68.3 %)  | RMSE 135.5 (82.1 %)   | RMSE 107.0 (64.9 %)  | RMSE 137.5 (83.4 %)   | RMSE 146.1 (88.6 %)   | RMSE 169.3<br>(102.7 %) | RMSE 200.2<br>(121.4 %) | RMSE 163.1 (98.9 %)   | RMSE 201.1<br>(122.0 %) | RMSE 142.8 (86.6 %)   |
|                                                                                                                    | CC 0.744                                                                                                             | CC 0.744             | CC 0.744              | CC 0.747             | CC 0.756              | CC 0.794              | CC 0.794                | CC 0.794                | CC 0.793              | CC 0.804                | CC 0.715              |
| Abbotts_Hall                                                                                                       | MBE 21.7<br>(12.0 %)                                                                                                 | MBE 38.6<br>(21.3 %) | MBE 60.4<br>(33.3 %)  | MBE 31.8<br>(17.5 %) | MBE 64.0<br>(35.3 %)  | MBE 83.2<br>(45.9 %)  | MBE 105.2<br>(58.0 %)   | MBE 133.6<br>(73.7 %)   | MBE 97.1<br>(53.5 %)  | MBE 136.9<br>(75.5 %)   | MBE 96.6<br>(53.3 %)  |
| NBDATA: 2162                                                                                                       | STD 84.2<br>(46.4 %)                                                                                                 | STD 88.0<br>(48.5 %) | STD 93.7<br>(51.7 %)  | STD 86.4<br>(47.6 %) | STD 86.4<br>(47.6 %)  | STD 125.9<br>(69.4 %) | STD 139.7<br>(77.0 %)   | STD 157.9<br>(87.1 %)   | STD 135.9<br>(75.0 %) | STD 151.0<br>(83.3 %)   | STD 143.1<br>(78.9 %) |

|                |                            |                            |                            |                            |                            |                            |                            |                            |                            |                            |                            |
|----------------|----------------------------|----------------------------|----------------------------|----------------------------|----------------------------|----------------------------|----------------------------|----------------------------|----------------------------|----------------------------|----------------------------|
| MEANREF: 181.3 | RMSE 86.9<br>(48.0 %)      | RMSE 96.1<br>(53.0 %)      | RMSE<br>111.5 (61.5 %)     | RMSE 92.0<br>(50.8 %)      | RMSE<br>107.5 (59.3 %)     | RMSE<br>150.9 (83.2 %)     | RMSE<br>174.9 (96.4 %)     | RMSE<br>206.9<br>(114.1 %) | RMSE<br>167.0 (92.1 %)     | RMSE<br>203.8<br>(112.4 %) | RMSE<br>172.6 (95.2 %)     |
|                | CC 0.656                   | CC 0.656                   | CC 0.656                   | CC 0.662                   | CC 0.690                   | CC 0.781                   | CC 0.781                   | CC 0.781                   | CC 0.783                   | CC 0.801                   | CC 0.650                   |
| Albacete       | MBE 195.7<br>(94.6 %)      | MBE 229.2<br>(110.8 %)     | MBE 272.5<br>(131.7 %)     | MBE 211.2<br>(102.1 %)     | MBE 268.5<br>(129.8 %)     | MBE 161.9<br>(78.3 %)      | MBE 192.7<br>(93.1 %)      | MBE 232.3<br>(112.3 %)     | MBE 176.5<br>(85.3 %)      | MBE 226.2<br>(109.3 %)     | MBE 178.7<br>(86.3 %)      |
| NBDATA: 821    | STD 187.6<br>(90.6 %)      | STD 206.6<br>(99.8 %)      | STD 231.6<br>(111.9 %)     | STD 197.0<br>(95.2 %)      | STD 199.9<br>(96.6 %)      | STD 206.6<br>(99.8 %)      | STD 228.3<br>(110.3 %)     | STD 256.7<br>(124.1 %)     | STD 218.0<br>(105.4 %)     | STD 230.9<br>(111.6 %)     | STD 227.7<br>(110.0 %)     |
| MEANREF: 206.9 | RMSE<br>271.1<br>(131.0 %) | RMSE<br>308.6<br>(149.1 %) | RMSE<br>357.6<br>(172.8 %) | RMSE<br>288.8<br>(139.6 %) | RMSE<br>334.8<br>(161.8 %) | RMSE<br>262.5<br>(126.9 %) | RMSE<br>298.8<br>(144.4 %) | RMSE<br>346.2<br>(167.3 %) | RMSE<br>280.6<br>(135.6 %) | RMSE<br>323.3<br>(156.2 %) | RMSE<br>289.4<br>(139.8 %) |
|                | CC 0.708                   | CC 0.708                   | CC 0.708                   | CC 0.712                   | CC 0.740                   | CC 0.746                   | CC 0.746                   | CC 0.746                   | CC 0.748                   | CC 0.770                   | CC 0.650                   |
| Cordoba        | MBE 135.8<br>(71.7 %)      | MBE 162.9<br>(86.0 %)      | MBE 197.8<br>(104.4 %)     | MBE 151.8<br>(80.2 %)      | MBE 207.4<br>(109.5 %)     | MBE 97.9<br>(51.7 %)       | MBE 121.9<br>(64.3 %)      | MBE 152.7<br>(80.6 %)      | MBE 111.9<br>(59.1 %)      | MBE 157.5<br>(83.1 %)      | MBE 116.3<br>(61.4 %)      |
| NBDATA: 684    | STD 97.0<br>(51.2 %)       | STD 104.7<br>(55.3 %)      | STD 115.4<br>(60.9 %)      | STD 101.6<br>(53.6 %)      | STD 107.4<br>(56.7 %)      | STD 147.0<br>(77.6 %)      | STD 162.4<br>(85.7 %)      | STD 182.6<br>(96.4 %)      | STD 155.5<br>(82.1 %)      | STD 175.7<br>(92.8 %)      | STD 119.3<br>(63.0 %)      |
| MEANREF: 189.4 | RMSE<br>166.8 (88.1 %)     | RMSE<br>193.6<br>(102.2 %) | RMSE<br>229.0<br>(120.9 %) | RMSE<br>182.7 (96.4 %)     | RMSE<br>233.5<br>(123.3 %) | RMSE<br>176.6 (93.3 %)     | RMSE<br>203.0<br>(107.2 %) | RMSE<br>238.0<br>(125.6 %) | RMSE<br>191.6<br>(101.2 %) | RMSE<br>236.0<br>(124.6 %) | RMSE<br>166.6 (88.0 %)     |
|                | CC 0.683                   | CC 0.683                   | CC 0.683                   | CC 0.685                   | CC 0.707                   | CC 0.738                   | CC 0.738                   | CC 0.738                   | CC 0.741                   | CC 0.758                   | CC 0.639                   |
| Czech_BKF_SF   | MBE 85.7<br>(49.3 %)       | MBE 107.3<br>(61.8 %)      | MBE 135.1<br>(77.8 %)      | MBE 93.1<br>(53.6 %)       | MBE 132.2<br>(76.1 %)      | MBE 140.2<br>(80.7 %)      | MBE 166.4<br>(95.8 %)      | MBE 200.1<br>(115.2 %)     | MBE 150.5<br>(86.6 %)      | MBE 196.0<br>(112.8 %)     | MBE 107.3<br>(61.8 %)      |
| NBDATA: 21412  | STD 122.2<br>(70.3 %)      | STD 131.6<br>(75.7 %)      | STD 144.4<br>(83.1 %)      | STD 125.6<br>(72.3 %)      | STD 130.5<br>(75.1 %)      | STD 154.6<br>(89.0 %)      | STD 170.4<br>(98.1 %)      | STD 191.2<br>(110.1 %)     | STD 163.1<br>(93.9 %)      | STD 177.9<br>(102.4 %)     | STD 127.3<br>(73.3 %)      |
| MEANREF: 173.7 | RMSE<br>149.2 (85.9 %)     | RMSE<br>169.8 (97.7 %)     | RMSE<br>197.8<br>(113.8 %) | RMSE<br>156.3 (90.0 %)     | RMSE<br>185.8<br>(106.9 %) | RMSE<br>208.7<br>(120.1 %) | RMSE<br>238.1<br>(137.1 %) | RMSE<br>276.8<br>(159.3 %) | RMSE<br>221.9<br>(127.8 %) | RMSE<br>264.7<br>(152.4 %) | RMSE<br>166.5 (95.8 %)     |
|                | CC 0.604                   | CC 0.604                   | CC 0.604                   | CC 0.612                   | CC 0.633                   | CC 0.721                   | CC 0.721                   | CC 0.721                   | CC 0.722                   | CC 0.739                   | CC 0.695                   |
| Czech_BKF_ST   | MBE 88.1<br>(53.0 %)       | MBE 109.3<br>(65.7 %)      | MBE 136.6<br>(82.2 %)      | MBE 94.5<br>(56.8 %)       | MBE 133.6<br>(80.4 %)      | MBE 125.1<br>(75.3 %)      | MBE 149.4<br>(89.9 %)      | MBE 180.7<br>(108.7 %)     | MBE 133.9<br>(80.5 %)      | MBE 176.2<br>(106.0 %)     | MBE 105.3<br>(63.3 %)      |
| NBDATA: 25415  | STD 113.6<br>(68.3 %)      | STD 122.3<br>(73.5 %)      | STD 134.2<br>(80.7 %)      | STD 116.7<br>(70.2 %)      | STD 122.0<br>(73.4 %)      | STD 150.1<br>(90.2 %)      | STD 165.5<br>(99.6 %)      | STD 185.9<br>(111.8 %)     | STD 158.3<br>(95.2 %)      | STD 173.8<br>(104.5 %)     | STD 119.9<br>(72.1 %)      |
| MEANREF: 166.3 | RMSE<br>143.8 (86.5 %)     | RMSE<br>164.0 (98.6 %)     | RMSE<br>191.5<br>(115.2 %) | RMSE<br>150.1 (90.3 %)     | RMSE<br>180.9<br>(108.8 %) | RMSE<br>195.4<br>(117.5 %) | RMSE<br>223.0<br>(134.1 %) | RMSE<br>259.3<br>(155.9 %) | RMSE<br>207.4<br>(124.7 %) | RMSE<br>247.5<br>(148.8 %) | RMSE<br>159.5 (96.0 %)     |

|                |                           |                            |                            |                           |                            |                            |                            |                            |                            |                            |                            |
|----------------|---------------------------|----------------------------|----------------------------|---------------------------|----------------------------|----------------------------|----------------------------|----------------------------|----------------------------|----------------------------|----------------------------|
|                | CC 0.616                  | CC 0.616                   | CC 0.616                   | CC 0.625                  | CC 0.643                   | CC 0.728                   | CC 0.728                   | CC 0.728                   | CC 0.730                   | CC 0.747                   | CC 0.699                   |
| Czech_BKG      | MBE 89.8<br>(51.7 %)      | MBE 111.8<br>(64.3 %)      | MBE 140.1<br>(80.6 %)      | MBE 97.1<br>(55.9 %)      | MBE 135.8<br>(78.1 %)      | MBE 136.2<br>(78.4 %)      | MBE 162.0<br>(93.2 %)      | MBE 195.3<br>(112.4 %)     | MBE 146.1<br>(84.1 %)      | MBE 190.0<br>(109.3 %)     | MBE 117.2<br>(67.5 %)      |
| NBDATA: 22108  | STD 137.3<br>(79.0 %)     | STD 148.1<br>(85.2 %)      | STD 162.6<br>(93.6 %)      | STD 141.7<br>(81.5 %)     | STD 144.6<br>(83.2 %)      | STD 162.0<br>(93.2 %)      | STD 178.3<br>(102.6 %)     | STD 199.8<br>(115.0 %)     | STD 170.7<br>(98.3 %)      | STD 184.3<br>(106.1 %)     | STD 140.4<br>(80.8 %)      |
| MEANREF: 173.8 | RMSE<br>164.1 (94.4<br>%) | RMSE<br>185.6<br>(106.8 %) | RMSE<br>214.6<br>(123.5 %) | RMSE<br>171.8 (98.8<br>%) | RMSE<br>198.3<br>(114.1 %) | RMSE<br>211.6<br>(121.8 %) | RMSE<br>240.9<br>(138.7 %) | RMSE<br>279.4<br>(160.8 %) | RMSE<br>224.7<br>(129.3 %) | RMSE<br>264.7<br>(152.3 %) | RMSE<br>182.9<br>(105.2 %) |
|                | CC 0.551                  | CC 0.551                   | CC 0.551                   | CC 0.560                  | CC 0.583                   | CC 0.705                   | CC 0.705                   | CC 0.705                   | CC 0.707                   | CC 0.727                   | CC 0.656                   |
| Czech_KRP      | MBE 55.9<br>(32.2 %)      | MBE 75.1<br>(43.2 %)       | MBE 99.8<br>(57.4 %)       | MBE 62.2<br>(35.8 %)      | MBE 100.4<br>(57.7 %)      | MBE 87.4<br>(50.3 %)       | MBE 109.2<br>(62.8 %)      | MBE 137.2<br>(78.9 %)      | MBE 95.5<br>(54.9 %)       | MBE 136.2<br>(78.3 %)      | MBE 78.0<br>(44.9 %)       |
| NBDATA: 10819  | STD 84.6<br>(48.6 %)      | STD 88.9<br>(51.1 %)       | STD 95.4<br>(54.9 %)       | STD 85.9<br>(49.4 %)      | STD 89.3<br>(51.4 %)       | STD 128.1<br>(73.7 %)      | STD 141.3<br>(81.2 %)      | STD 158.8<br>(91.3 %)      | STD 135.3<br>(77.8 %)      | STD 151.0<br>(86.9 %)      | STD 106.8<br>(61.4 %)      |
| MEANREF: 173.9 | RMSE<br>101.4 (58.3<br>%) | RMSE<br>116.4 (66.9<br>%)  | RMSE<br>138.1 (79.4<br>%)  | RMSE<br>106.1 (61.0<br>%) | RMSE<br>134.4 (77.3<br>%)  | RMSE<br>155.1 (89.2<br>%)  | RMSE<br>178.5<br>(102.7 %) | RMSE<br>209.9<br>(120.7 %) | RMSE<br>165.6 (95.3<br>%)  | RMSE<br>203.4<br>(116.9 %) | RMSE<br>132.3 (76.1<br>%)  |
|                | CC 0.675                  | CC 0.675                   | CC 0.675                   | CC 0.685                  | CC 0.707                   | CC 0.741                   | CC 0.741                   | CC 0.741                   | CC 0.744                   | CC 0.766                   | CC 0.696                   |
| Czech_LNZ      | MBE 27.4<br>(16.3 %)      | MBE 43.6<br>(26.0 %)       | MBE 64.6<br>(38.5 %)       | MBE 33.7<br>(20.1 %)      | MBE 66.5<br>(39.7 %)       | MBE 73.8<br>(44.1 %)       | MBE 93.9<br>(56.1 %)       | MBE 119.8<br>(71.5 %)      | MBE 82.8<br>(49.4 %)       | MBE 120.7<br>(72.1 %)      | MBE 74.5<br>(44.5 %)       |
| NBDATA: 7809   | STD 79.0<br>(47.2 %)      | STD 81.9<br>(48.9 %)       | STD 86.5<br>(51.7 %)       | STD 79.3<br>(47.3 %)      | STD 79.7<br>(47.6 %)       | STD 121.5<br>(72.5 %)      | STD 134.2<br>(80.1 %)      | STD 151.1<br>(90.2 %)      | STD 129.1<br>(77.1 %)      | STD 144.6<br>(86.3 %)      | STD 93.1<br>(55.6 %)       |
| MEANREF: 167.5 | RMSE 83.6<br>(49.9 %)     | RMSE 92.8<br>(55.4 %)      | RMSE<br>107.9 (64.4<br>%)  | RMSE 86.2<br>(51.4 %)     | RMSE<br>103.8 (62.0<br>%)  | RMSE<br>142.2 (84.9<br>%)  | RMSE<br>163.8 (97.8<br>%)  | RMSE<br>192.8<br>(115.1 %) | RMSE<br>153.4 (91.6<br>%)  | RMSE<br>188.4<br>(112.5 %) | RMSE<br>119.2 (71.2<br>%)  |
|                | CC 0.667                  | CC 0.667                   | CC 0.667                   | CC 0.681                  | CC 0.708                   | CC 0.753                   | CC 0.753                   | CC 0.753                   | CC 0.758                   | CC 0.781                   | CC 0.737                   |
| Czech_RAJ      | MBE 63.5<br>(37.2 %)      | MBE 83.0<br>(48.7 %)       | MBE 108.2<br>(63.4 %)      | MBE 70.2<br>(41.1 %)      | MBE 106.1<br>(62.2 %)      | MBE 106.2<br>(62.2 %)      | MBE 129.3<br>(75.8 %)      | MBE 159.0<br>(93.2 %)      | MBE 115.2<br>(67.5 %)      | MBE 155.3<br>(91.0 %)      | MBE 110.0<br>(64.5 %)      |
| NBDATA: 14121  | STD 109.3<br>(64.1 %)     | STD 116.9<br>(68.5 %)      | STD 127.5<br>(74.7 %)      | STD 112.4<br>(65.9 %)     | STD 115.7<br>(67.8 %)      | STD 145.2<br>(85.1 %)      | STD 160.3<br>(94.0 %)      | STD 180.2<br>(105.6 %)     | STD 153.5<br>(90.0 %)      | STD 168.1<br>(98.5 %)      | STD 143.8<br>(84.3 %)      |
| MEANREF: 170.6 | RMSE<br>126.4 (74.1<br>%) | RMSE<br>143.4 (84.0<br>%)  | RMSE<br>167.2 (98.0<br>%)  | RMSE<br>132.5 (77.7<br>%) | RMSE<br>157.0 (92.0<br>%)  | RMSE<br>179.9<br>(105.4 %) | RMSE<br>205.9<br>(120.7 %) | RMSE<br>240.3<br>(140.8 %) | RMSE<br>192.0<br>(112.5 %) | RMSE<br>228.8<br>(134.1 %) | RMSE<br>181.1<br>(106.1 %) |
|                | CC 0.599                  | CC 0.599                   | CC 0.599                   | CC 0.609                  | CC 0.635                   | CC 0.737                   | CC 0.737                   | CC 0.737                   | CC 0.740                   | CC 0.763                   | CC 0.654                   |
| Czech_STI      | MBE 50.7<br>(30.3 %)      | MBE 68.9<br>(41.1 %)       | MBE 92.3<br>(55.1 %)       | MBE 57.1<br>(34.1 %)      | MBE 91.3<br>(54.5 %)       | MBE 109.3<br>(65.3 %)      | MBE 132.4<br>(79.1 %)      | MBE 162.1<br>(96.9 %)      | MBE 118.8<br>(71.0 %)      | MBE 159.9<br>(95.5 %)      | MBE 128.0<br>(76.5 %)      |

|                |                           |                           |                           |                           |                           |                            |                            |                            |                            |                            |                            |
|----------------|---------------------------|---------------------------|---------------------------|---------------------------|---------------------------|----------------------------|----------------------------|----------------------------|----------------------------|----------------------------|----------------------------|
| NBDATA: 17497  | STD 105.5<br>(63.1 %)     | STD 112.7<br>(67.4 %)     | STD 122.8<br>(73.4 %)     | STD 108.4<br>(64.7 %)     | STD 110.9<br>(66.3 %)     | STD 150.4<br>(89.9 %)      | STD 165.9<br>(99.2 %)      | STD 186.4<br>(111.4 %)     | STD 159.3<br>(95.2 %)      | STD 175.5<br>(104.9 %)     | STD 167.8<br>(100.3 %)     |
| MEANREF: 167.4 | RMSE<br>117.1 (70.0<br>%) | RMSE<br>132.1 (78.9<br>%) | RMSE<br>153.6 (91.8<br>%) | RMSE<br>122.5 (73.2<br>%) | RMSE<br>143.6 (85.8<br>%) | RMSE<br>185.9<br>(111.1 %) | RMSE<br>212.3<br>(126.9 %) | RMSE<br>247.0<br>(147.6 %) | RMSE<br>198.7<br>(118.8 %) | RMSE<br>237.4<br>(141.9 %) | RMSE<br>211.1<br>(126.1 %) |
|                | CC 0.605                  | CC 0.605                  | CC 0.605                  | CC 0.614                  | CC 0.639                  | CC 0.730                   | CC 0.730                   | CC 0.730                   | CC 0.733                   | CC 0.751                   | CC 0.648                   |
| Czech_TRE      | MBE 43.7<br>(25.0 %)      | MBE 61.9<br>(35.4 %)      | MBE 85.4<br>(48.9 %)      | MBE 50.2<br>(28.7 %)      | MBE 85.7<br>(49.1 %)      | MBE 88.4<br>(50.6 %)       | MBE 110.4<br>(63.1 %)      | MBE 138.6<br>(79.3 %)      | MBE 97.5<br>(55.8 %)       | MBE 137.7<br>(78.8 %)      | MBE 81.8<br>(46.8 %)       |
| NBDATA: 21499  | STD 87.7<br>(50.2 %)      | STD 91.4<br>(52.3 %)      | STD 97.0<br>(55.5 %)      | STD 88.5<br>(50.7 %)      | STD 89.3<br>(51.1 %)      | STD 131.1<br>(75.0 %)      | STD 144.6<br>(82.8 %)      | STD 162.6<br>(93.0 %)      | STD 138.9<br>(79.5 %)      | STD 154.4<br>(88.3 %)      | STD 118.7<br>(67.9 %)      |
| MEANREF: 174.7 | RMSE 98.0<br>(56.1 %)     | RMSE<br>110.4 (63.2<br>%) | RMSE<br>129.2 (74.0<br>%) | RMSE<br>101.8 (58.2<br>%) | RMSE<br>123.8 (70.8<br>%) | RMSE<br>158.1 (90.5<br>%)  | RMSE<br>181.9<br>(104.1 %) | RMSE<br>213.7<br>(122.3 %) | RMSE<br>169.7 (97.1<br>%)  | RMSE<br>206.9<br>(118.4 %) | RMSE<br>144.2 (82.5<br>%)  |
|                | CC 0.631                  | CC 0.631                  | CC 0.631                  | CC 0.644                  | CC 0.673                  | CC 0.742                   | CC 0.742                   | CC 0.742                   | CC 0.746                   | CC 0.769                   | CC 0.658                   |
| EFDC_DE-Hai    | MBE 59.9<br>(31.9 %)      | MBE 80.6<br>(42.9 %)      | MBE 107.2<br>(57.1 %)     | MBE 67.9<br>(36.2 %)      | MBE 105.9<br>(56.4 %)     | MBE 114.7<br>(61.1 %)      | MBE 139.9<br>(74.6 %)      | MBE 172.3<br>(91.9 %)      | MBE 125.7<br>(67.0 %)      | MBE 169.8<br>(90.5 %)      | MBE 114.3<br>(60.9 %)      |
| NBDATA: 18917  | STD 107.4<br>(57.2 %)     | STD 113.9<br>(60.7 %)     | STD 123.0<br>(65.6 %)     | STD 109.1<br>(58.1 %)     | STD 112.2<br>(59.8 %)     | STD 145.0<br>(77.3 %)      | STD 159.9<br>(85.2 %)      | STD 179.6<br>(95.7 %)      | STD 153.1<br>(81.6 %)      | STD 167.2<br>(89.1 %)      | STD 139.8<br>(74.5 %)      |
| MEANREF: 187.6 | RMSE<br>123.0 (65.6<br>%) | RMSE<br>139.5 (74.4<br>%) | RMSE<br>163.2 (87.0<br>%) | RMSE<br>128.5 (68.5<br>%) | RMSE<br>154.3 (82.2<br>%) | RMSE<br>184.8 (98.5<br>%)  | RMSE<br>212.4<br>(113.2 %) | RMSE<br>248.9<br>(132.7 %) | RMSE<br>198.1<br>(105.6 %) | RMSE<br>238.3<br>(127.0 %) | RMSE<br>180.6 (96.3<br>%)  |
|                | CC 0.572                  | CC 0.572                  | CC 0.572                  | CC 0.584                  | CC 0.604                  | CC 0.732                   | CC 0.732                   | CC 0.732                   | CC 0.734                   | CC 0.756                   | CC 0.654                   |
| EFDC_FR-Aur    | MBE 78.4<br>(41.0 %)      | MBE 100.8<br>(52.7 %)     | MBE 129.8<br>(67.9 %)     | MBE 89.9<br>(47.0 %)      | MBE 135.8<br>(71.0 %)     | MBE 95.4<br>(49.9 %)       | MBE 119.3<br>(62.4 %)      | MBE 150.1<br>(78.4 %)      | MBE 108.0<br>(56.4 %)      | MBE 153.6<br>(80.3 %)      | MBE 118.1<br>(61.7 %)      |
| NBDATA: 16214  | STD 95.4<br>(49.9 %)      | STD 102.0<br>(53.4 %)     | STD 111.6<br>(58.3 %)     | STD 99.7<br>(52.1 %)      | STD 103.2<br>(54.0 %)     | STD 149.2<br>(78.0 %)      | STD 164.7<br>(86.1 %)      | STD 185.2<br>(96.8 %)      | STD 158.1<br>(82.6 %)      | STD 175.4<br>(91.7 %)      | STD 144.8<br>(75.7 %)      |
| MEANREF: 191.3 | RMSE<br>123.5 (64.6<br>%) | RMSE<br>143.5 (75.0<br>%) | RMSE<br>171.1 (89.5<br>%) | RMSE<br>134.3 (70.2<br>%) | RMSE<br>170.6 (89.2<br>%) | RMSE<br>177.1 (92.5<br>%)  | RMSE<br>203.3<br>(106.3 %) | RMSE<br>238.3<br>(124.6 %) | RMSE<br>191.4<br>(100.1 %) | RMSE<br>233.1<br>(121.8 %) | RMSE<br>186.8 (97.6<br>%)  |
|                | CC 0.705                  | CC 0.705                  | CC 0.705                  | CC 0.708                  | CC 0.734                  | CC 0.740                   | CC 0.740                   | CC 0.740                   | CC 0.744                   | CC 0.767                   | CC 0.619                   |
| EFDC_FR-Pue    | MBE 139.3<br>(79.1 %)     | MBE 165.6<br>(94.0 %)     | MBE 199.5<br>(113.3 %)    | MBE 153.5<br>(87.1 %)     | MBE 206.1<br>(117.0 %)    | MBE 119.5<br>(67.8 %)      | MBE 144.1<br>(81.8 %)      | MBE 175.9<br>(99.9 %)      | MBE 133.1<br>(75.6 %)      | MBE 178.4<br>(101.3 %)     | MBE 113.2<br>(64.3 %)      |
| NBDATA: 12100  | STD 112.1<br>(63.7 %)     | STD 121.8<br>(69.2 %)     | STD 135.1<br>(76.7 %)     | STD 118.2<br>(67.1 %)     | STD 122.4<br>(69.5 %)     | STD 160.6<br>(91.2 %)      | STD 176.7<br>(100.3 %)     | STD 198.1<br>(112.4 %)     | STD 170.6<br>(96.8 %)      | STD 184.4<br>(104.7 %)     | STD 136.8<br>(77.6 %)      |



|                |                            |                            |                            |                            |                            |                            |                            |                            |                            |                            |                            |
|----------------|----------------------------|----------------------------|----------------------------|----------------------------|----------------------------|----------------------------|----------------------------|----------------------------|----------------------------|----------------------------|----------------------------|
| MEANREF: 176.1 | RMSE<br>178.8<br>(101.5 %) | RMSE<br>205.6<br>(116.7 %) | RMSE<br>240.9<br>(136.8 %) | RMSE<br>193.7<br>(110.0 %) | RMSE<br>239.7<br>(136.1 %) | RMSE<br>200.1<br>(113.6 %) | RMSE<br>228.1<br>(129.5 %) | RMSE<br>264.9<br>(150.4 %) | RMSE<br>216.4<br>(122.8 %) | RMSE<br>256.6<br>(145.7 %) | RMSE<br>177.5<br>(100.8 %) |
|                | CC 0.689                   | CC 0.689                   | CC 0.689                   | CC 0.692                   | CC 0.711                   | CC 0.706                   | CC 0.706                   | CC 0.706                   | CC 0.708                   | CC 0.728                   | CC 0.646                   |
| EFDC_GF-Guy    | MBE 106.3<br>(40.0 %)      | MBE 137.2<br>(51.7 %)      | MBE 177.1<br>(66.7 %)      | MBE 147.2<br>(55.5 %)      | MBE 188.4<br>(71.0 %)      | MBE 250.0<br>(94.2 %)      | MBE 293.0<br>(110.4 %)     | MBE 348.3<br>(131.2 %)     | MBE 306.9<br>(115.6 %)     | MBE 371.4<br>(139.9 %)     | MBE 292.7<br>(110.3 %)     |
| NBDATA: 6534   | STD 296.7<br>(111.8 %)     | STD 322.4<br>(121.5 %)     | STD 356.1<br>(134.2 %)     | STD 330.0<br>(124.3 %)     | STD 337.3<br>(127.1 %)     | STD 264.3<br>(99.6 %)      | STD 290.3<br>(109.4 %)     | STD 324.2<br>(122.1 %)     | STD 297.2<br>(112.0 %)     | STD 305.1<br>(114.9 %)     | STD 383.6<br>(144.5 %)     |
| MEANREF: 265.4 | RMSE<br>315.1<br>(118.7 %) | RMSE<br>350.4<br>(132.0 %) | RMSE<br>397.7<br>(149.8 %) | RMSE<br>361.3<br>(136.1 %) | RMSE<br>386.3<br>(145.6 %) | RMSE<br>363.9<br>(137.1 %) | RMSE<br>412.4<br>(155.4 %) | RMSE<br>475.9<br>(179.3 %) | RMSE<br>427.2<br>(160.9 %) | RMSE<br>480.7<br>(181.1 %) | RMSE<br>482.5<br>(181.8 %) |
|                | CC 0.490                   | CC 0.490                   | CC 0.490                   | CC 0.487                   | CC 0.516                   | CC 0.667                   | CC 0.667                   | CC 0.667                   | CC 0.665                   | CC 0.704                   | CC 0.652                   |
| EFDC_IE-Dri    | MBE 98.5<br>(52.3 %)       | MBE 122.4<br>(65.0 %)      | MBE 153.1<br>(81.4 %)      | MBE 111.3<br>(59.2 %)      | MBE 153.1<br>(81.4 %)      | MBE 128.1<br>(68.0 %)      | MBE 154.5<br>(82.0 %)      | MBE 188.4<br>(100.1 %)     | MBE 142.8<br>(75.8 %)      | MBE 185.4<br>(98.5 %)      | MBE 137.2<br>(72.9 %)      |
| NBDATA: 9860   | STD 115.7<br>(61.5 %)      | STD 127.1<br>(67.6 %)      | STD 142.6<br>(75.8 %)      | STD 121.3<br>(64.5 %)      | STD 131.1<br>(69.7 %)      | STD 166.0<br>(88.2 %)      | STD 184.2<br>(97.8 %)      | STD 208.1<br>(110.5 %)     | STD 176.4<br>(93.7 %)      | STD 191.5<br>(101.7 %)     | STD 163.4<br>(86.8 %)      |
| MEANREF: 188.1 | RMSE<br>152.0 (80.8 %)     | RMSE<br>176.5 (93.8 %)     | RMSE<br>209.3<br>(111.2 %) | RMSE<br>164.7 (87.5 %)     | RMSE<br>201.6<br>(107.2 %) | RMSE<br>209.7<br>(111.4 %) | RMSE<br>240.4<br>(127.7 %) | RMSE<br>280.7<br>(149.1 %) | RMSE<br>227.0<br>(120.5 %) | RMSE<br>266.5<br>(141.5 %) | RMSE<br>213.4<br>(113.3 %) |
|                | CC 0.751                   | CC 0.751                   | CC 0.751                   | CC 0.756                   | CC 0.770                   | CC 0.780                   | CC 0.780                   | CC 0.780                   | CC 0.783                   | CC 0.803                   | CC 0.708                   |
| EFDC_IL-Yat    | MBE 93.3<br>(48.4 %)       | MBE 117.2<br>(60.7 %)      | MBE 147.9<br>(76.7 %)      | MBE 100.8<br>(52.2 %)      | MBE 156.4<br>(81.1 %)      | MBE 91.5<br>(47.4 %)       | MBE 115.2<br>(59.7 %)      | MBE 145.8<br>(75.5 %)      | MBE 98.8<br>(51.2 %)       | MBE 150.4<br>(77.9 %)      | MBE 216.8<br>(112.4 %)     |
| NBDATA: 3651   | STD 112.1<br>(58.1 %)      | STD 121.6<br>(63.0 %)      | STD 134.6<br>(69.7 %)      | STD 115.5<br>(59.8 %)      | STD 127.7<br>(66.2 %)      | STD 148.3<br>(76.8 %)      | STD 161.4<br>(83.6 %)      | STD 178.8<br>(92.7 %)      | STD 152.3<br>(78.9 %)      | STD 167.8<br>(87.0 %)      | STD 198.4<br>(102.8 %)     |
| MEANREF: 193.0 | RMSE<br>145.8 (75.6 %)     | RMSE<br>168.9 (87.5 %)     | RMSE<br>200.0<br>(103.6 %) | RMSE<br>153.3 (79.4 %)     | RMSE<br>201.9<br>(104.6 %) | RMSE<br>174.2 (90.3 %)     | RMSE<br>198.3<br>(102.7 %) | RMSE<br>230.7<br>(119.5 %) | RMSE<br>181.6 (94.1 %)     | RMSE<br>225.4<br>(116.8 %) | RMSE<br>293.9<br>(152.3 %) |
|                | CC 0.679                   | CC 0.679                   | CC 0.679                   | CC 0.681                   | CC 0.709                   | CC 0.610                   | CC 0.610                   | CC 0.610                   | CC 0.614                   | CC 0.644                   | CC 0.681                   |
| EFDC_IT-Bci    | MBE 112.1<br>(64.1 %)      | MBE 136.0<br>(77.8 %)      | MBE 166.8<br>(95.4 %)      | MBE 123.6<br>(70.7 %)      | MBE 170.7<br>(97.7 %)      | MBE 102.1<br>(58.4 %)      | MBE 125.2<br>(71.6 %)      | MBE 154.9<br>(88.7 %)      | MBE 113.5<br>(65.0 %)      | MBE 156.3<br>(89.4 %)      | MBE 120.7<br>(69.0 %)      |
| NBDATA: 6885   | STD 114.3<br>(65.4 %)      | STD 123.6<br>(70.8 %)      | STD 136.3<br>(78.0 %)      | STD 119.5<br>(68.4 %)      | STD 124.1<br>(71.0 %)      | STD 138.3<br>(79.1 %)      | STD 152.8<br>(87.4 %)      | STD 172.0<br>(98.4 %)      | STD 146.7<br>(83.9 %)      | STD 159.4<br>(91.2 %)      | STD 146.6<br>(83.9 %)      |
| MEANREF: 174.7 | RMSE<br>160.1 (91.6 %)     | RMSE<br>183.8<br>(105.2 %) | RMSE<br>215.4<br>(123.3 %) | RMSE<br>171.9 (98.4 %)     | RMSE<br>211.0<br>(120.8 %) | RMSE<br>171.9 (98.4 %)     | RMSE<br>197.5<br>(113.0 %) | RMSE<br>231.4<br>(132.4 %) | RMSE<br>185.5<br>(106.1 %) | RMSE<br>223.2<br>(127.8 %) | RMSE<br>189.8<br>(108.6 %) |

|                |                           |                            |                            |                            |                            |                            |                            |                            |                            |                            |                            |
|----------------|---------------------------|----------------------------|----------------------------|----------------------------|----------------------------|----------------------------|----------------------------|----------------------------|----------------------------|----------------------------|----------------------------|
|                | CC 0.631                  | CC 0.631                   | CC 0.631                   | CC 0.633                   | CC 0.652                   | CC 0.746                   | CC 0.746                   | CC 0.746                   | CC 0.747                   | CC 0.770                   | CC 0.626                   |
| EFDC_IT-Noe    | MBE 98.3<br>(53.9 %)      | MBE 121.7<br>(66.8 %)      | MBE 151.9<br>(83.3 %)      | MBE 110.7<br>(60.7 %)      | MBE 153.3<br>(84.1 %)      | MBE 119.1<br>(65.3 %)      | MBE 144.3<br>(79.1 %)      | MBE 176.6<br>(96.9 %)      | MBE 132.9<br>(72.9 %)      | MBE 176.5<br>(96.8 %)      | MBE 114.7<br>(62.9 %)      |
| NBDATA: 2554   | STD 120.0<br>(65.8 %)     | STD 129.3<br>(70.9 %)      | STD 141.9<br>(77.8 %)      | STD 125.7<br>(68.9 %)      | STD 125.9<br>(69.0 %)      | STD 150.1<br>(82.3 %)      | STD 165.2<br>(90.6 %)      | STD 185.1<br>(101.5 %)     | STD 159.5<br>(87.5 %)      | STD 170.3<br>(93.4 %)      | STD 132.3<br>(72.6 %)      |
| MEANREF: 182.3 | RMSE<br>155.1 (85.1<br>%) | RMSE<br>177.6 (97.4<br>%)  | RMSE<br>207.9<br>(114.0 %) | RMSE<br>167.5 (91.9<br>%)  | RMSE<br>198.3<br>(108.8 %) | RMSE<br>191.6<br>(105.1 %) | RMSE<br>219.3<br>(120.3 %) | RMSE<br>255.8<br>(140.3 %) | RMSE<br>207.6<br>(113.9 %) | RMSE<br>245.2<br>(134.5 %) | RMSE<br>175.1 (96.1<br>%)  |
|                | CC 0.590                  | CC 0.590                   | CC 0.590                   | CC 0.594                   | CC 0.626                   | CC 0.704                   | CC 0.704                   | CC 0.704                   | CC 0.708                   | CC 0.735                   | CC 0.612                   |
| EFDC_RU-Fyo    | MBE 103.2<br>(63.6 %)     | MBE 125.3<br>(77.3 %)      | MBE 153.8<br>(94.9 %)      | MBE 111.0<br>(68.5 %)      | MBE 152.7<br>(94.2 %)      | MBE 86.9<br>(55.1 %)       | MBE 107.3<br>(68.0 %)      | MBE 133.5<br>(84.7 %)      | MBE 94.5<br>(59.9 %)       | MBE 127.4<br>(80.8 %)      | MBE 99.1<br>(62.9 %)       |
| NBDATA: 23369  | STD 123.7<br>(76.3 %)     | STD 135.7<br>(83.7 %)      | STD 151.8<br>(93.7 %)      | STD 130.2<br>(80.3 %)      | STD 150.0<br>(92.5 %)      | STD 132.4<br>(84.0 %)      | STD 145.0<br>(92.0 %)      | STD 161.7<br>(102.5 %)     | STD 139.7<br>(88.6 %)      | STD 148.8<br>(94.4 %)      | STD 131.7<br>(83.5 %)      |
| MEANREF: 162.1 | RMSE<br>161.1 (99.4<br>%) | RMSE<br>184.7<br>(114.0 %) | RMSE<br>216.1<br>(133.3 %) | RMSE<br>171.1<br>(105.6 %) | RMSE<br>214.0<br>(132.0 %) | RMSE<br>158.4<br>(100.4 %) | RMSE<br>180.4<br>(114.4 %) | RMSE<br>209.7<br>(133.0 %) | RMSE<br>168.7<br>(107.0 %) | RMSE<br>195.9<br>(124.2 %) | RMSE<br>164.8<br>(104.5 %) |
|                | CC 0.702                  | CC 0.702                   | CC 0.702                   | CC 0.710                   | CC 0.727                   | CC 0.670                   | CC 0.670                   | CC 0.670                   | CC 0.676                   | CC 0.714                   | CC 0.755                   |
| EFDC_UK-Amo    | MBE 95.1<br>(52.2 %)      | MBE 118.2<br>(64.9 %)      | MBE 147.9<br>(81.3 %)      | MBE 104.9<br>(57.6 %)      | MBE 146.0<br>(80.2 %)      | MBE 115.3<br>(64.2 %)      | MBE 139.9<br>(77.9 %)      | MBE 171.6<br>(95.6 %)      | MBE 126.2<br>(70.3 %)      | MBE 166.1<br>(92.5 %)      | MBE 144.6<br>(80.6 %)      |
| NBDATA: 23556  | STD 118.9<br>(65.3 %)     | STD 128.8<br>(70.8 %)      | STD 142.4<br>(78.2 %)      | STD 122.2<br>(67.2 %)      | STD 130.0<br>(71.4 %)      | STD 145.7<br>(81.1 %)      | STD 159.9<br>(89.1 %)      | STD 178.8<br>(99.6 %)      | STD 152.4<br>(84.9 %)      | STD 162.1<br>(90.3 %)      | STD 166.4<br>(92.7 %)      |
| MEANREF: 182.0 | RMSE<br>152.2 (83.6<br>%) | RMSE<br>174.8 (96.0<br>%)  | RMSE<br>205.3<br>(112.8 %) | RMSE<br>161.1 (88.5<br>%)  | RMSE<br>195.5<br>(107.4 %) | RMSE<br>185.8<br>(103.5 %) | RMSE<br>212.5<br>(118.3 %) | RMSE<br>247.8<br>(138.0 %) | RMSE<br>197.8<br>(110.2 %) | RMSE<br>232.1<br>(129.3 %) | RMSE<br>220.5<br>(122.8 %) |
|                | CC 0.651                  | CC 0.651                   | CC 0.651                   | CC 0.660                   | CC 0.693                   | CC 0.690                   | CC 0.690                   | CC 0.690                   | CC 0.695                   | CC 0.733                   | CC 0.675                   |
| EFDC_ZA-Kru    | MBE 66.1<br>(25.8 %)      | MBE 93.0<br>(36.3 %)       | MBE 127.6<br>(49.8 %)      | MBE 90.5<br>(35.3 %)       | MBE 157.5<br>(61.5 %)      | MBE 108.7<br>(42.4 %)      | MBE 139.2<br>(54.3 %)      | MBE 178.4<br>(69.6 %)      | MBE 136.5<br>(53.3 %)      | MBE 209.8<br>(81.9 %)      | MBE 100.9<br>(39.4 %)      |
| NBDATA: 715    | STD 82.3<br>(32.1 %)      | STD 88.1<br>(34.4 %)       | STD 97.6<br>(38.1 %)       | STD 87.1<br>(34.0 %)       | STD 100.1<br>(39.1 %)      | STD 136.4<br>(53.2 %)      | STD 151.8<br>(59.2 %)      | STD 172.6<br>(67.4 %)      | STD 150.8<br>(58.9 %)      | STD 178.8<br>(69.8 %)      | STD 122.8<br>(47.9 %)      |
| MEANREF: 256.3 | RMSE<br>105.6 (41.2<br>%) | RMSE<br>128.1 (50.0<br>%)  | RMSE<br>160.6 (62.7<br>%)  | RMSE<br>125.6 (49.0<br>%)  | RMSE<br>186.6 (72.8<br>%)  | RMSE<br>174.4 (68.1<br>%)  | RMSE<br>205.9 (80.4<br>%)  | RMSE<br>248.2 (96.9<br>%)  | RMSE<br>203.4 (79.4<br>%)  | RMSE<br>275.7<br>(107.6 %) | RMSE<br>158.9 (62.0<br>%)  |
|                | CC 0.852                  | CC 0.852                   | CC 0.852                   | CC 0.854                   | CC 0.859                   | CC 0.819                   | CC 0.819                   | CC 0.819                   | CC 0.819                   | CC 0.829                   | CC 0.851                   |
| Kishinev       | MBE 68.6<br>(41.6 %)      | MBE 88.1<br>(53.4 %)       | MBE 113.2<br>(68.6 %)      | MBE 75.4<br>(45.7 %)       | MBE 117.0<br>(70.9 %)      | MBE 63.7<br>(38.6 %)       | MBE 82.8<br>(50.2 %)       | MBE 107.3<br>(65.1 %)      | MBE 71.6<br>(43.4 %)       | MBE 108.8<br>(65.9 %)      | MBE 71.2<br>(43.2 %)       |

|                               |                            |                            |                            |                            |                            |                            |                            |                            |                            |                            |                            |
|-------------------------------|----------------------------|----------------------------|----------------------------|----------------------------|----------------------------|----------------------------|----------------------------|----------------------------|----------------------------|----------------------------|----------------------------|
| NBDATA: 16470                 | STD 90.0<br>(54.6 %)       | STD 96.1<br>(58.3 %)       | STD 104.7<br>(63.5 %)      | STD 93.3<br>(56.5 %)       | STD 100.4<br>(60.9 %)      | STD 128.5<br>(77.9 %)      | STD 141.5<br>(85.8 %)      | STD 158.7<br>(96.2 %)      | STD 136.7<br>(82.8 %)      | STD 151.1<br>(91.6 %)      | STD 106.9<br>(64.8 %)      |
| MEANREF: 164.9                | RMSE<br>113.2 (68.6<br>%)  | RMSE<br>130.3 (79.0<br>%)  | RMSE<br>154.2 (93.5<br>%)  | RMSE<br>119.9 (72.7<br>%)  | RMSE<br>154.2 (93.5<br>%)  | RMSE<br>143.4 (86.9<br>%)  | RMSE<br>163.9 (99.4<br>%)  | RMSE<br>191.6<br>(116.1 %) | RMSE<br>154.3 (93.5<br>%)  | RMSE<br>186.2<br>(112.8 %) | RMSE<br>128.5 (77.9<br>%)  |
|                               | CC 0.660                   | CC 0.660                   | CC 0.660                   | CC 0.668                   | CC 0.683                   | CC 0.720                   | CC 0.720                   | CC 0.720                   | CC 0.723                   | CC 0.747                   | CC 0.691                   |
| Lugo                          | MBE 139.1<br>(70.3 %)      | MBE 167.2<br>(84.5 %)      | MBE 203.4<br>(102.8 %)     | MBE 153.4<br>(77.5 %)      | MBE 192.9<br>(97.5 %)      | MBE 166.9<br>(84.4 %)      | MBE 197.3<br>(99.8 %)      | MBE 236.5<br>(119.6 %)     | MBE 182.9<br>(92.5 %)      | MBE 224.4<br>(113.5 %)     | MBE 185.4<br>(93.7 %)      |
| NBDATA: 2181                  | STD 240.6<br>(121.6 %)     | STD 260.2<br>(131.6 %)     | STD 286.0<br>(144.6 %)     | STD 248.0<br>(125.4 %)     | STD 244.4<br>(123.5 %)     | STD 258.2<br>(130.5 %)     | STD 282.0<br>(142.6 %)     | STD 313.0<br>(158.2 %)     | STD 268.9<br>(135.9 %)     | STD 275.0<br>(139.0 %)     | STD 266.2<br>(134.6 %)     |
| MEANREF: 197.8                | RMSE<br>277.9<br>(140.5 %) | RMSE<br>309.3<br>(156.4 %) | RMSE<br>350.9<br>(177.4 %) | RMSE<br>291.6<br>(147.4 %) | RMSE<br>311.3<br>(157.4 %) | RMSE<br>307.5<br>(155.4 %) | RMSE<br>344.2<br>(174.0 %) | RMSE<br>392.3<br>(198.3 %) | RMSE<br>325.2<br>(164.4 %) | RMSE<br>355.0<br>(179.4 %) | RMSE<br>324.4<br>(164.0 %) |
|                               | CC 0.383                   | CC 0.383                   | CC 0.383                   | CC 0.392                   | CC 0.427                   | CC 0.563                   | CC 0.563                   | CC 0.563                   | CC 0.571                   | CC 0.613                   | CC 0.468                   |
| PeronneSaintQuentin-<br>tour2 | MBE 50.9<br>(28.9 %)       | MBE 69.9<br>(39.6 %)       | MBE 94.3<br>(53.5 %)       | MBE 60.3<br>(34.2 %)       | MBE 97.7<br>(55.4 %)       | MBE 72.2<br>(40.9 %)       | MBE 92.9<br>(52.7 %)       | MBE 119.6<br>(67.8 %)      | MBE 82.9<br>(47.0 %)       | MBE 121.1<br>(68.7 %)      | MBE 91.9<br>(52.1 %)       |
| NBDATA: 8101                  | STD 66.9<br>(37.9 %)       | STD 70.2<br>(39.8 %)       | STD 75.7<br>(43.0 %)       | STD 68.0<br>(38.6 %)       | STD 72.0<br>(40.8 %)       | STD 115.6<br>(65.6 %)      | STD 128.3<br>(72.8 %)      | STD 145.2<br>(82.4 %)      | STD 123.4<br>(70.0 %)      | STD 140.3<br>(79.5 %)      | STD 109.7<br>(62.2 %)      |
| MEANREF: 176.3                | RMSE 84.1<br>(47.7 %)      | RMSE 99.0<br>(56.2 %)      | RMSE<br>120.9 (68.6<br>%)  | RMSE 90.9<br>(51.6 %)      | RMSE<br>121.3 (68.8<br>%)  | RMSE<br>136.3 (77.3<br>%)  | RMSE<br>158.4 (89.8<br>%)  | RMSE<br>188.1<br>(106.7 %) | RMSE<br>148.6 (84.3<br>%)  | RMSE<br>185.3<br>(105.1 %) | RMSE<br>143.1 (81.1<br>%)  |
|                               | CC 0.797                   | CC 0.797                   | CC 0.797                   | CC 0.805                   | CC 0.823                   | CC 0.790                   | CC 0.790                   | CC 0.790                   | CC 0.796                   | CC 0.818                   | CC 0.720                   |
| Pokola                        | MBE 57.5<br>(23.5 %)       | MBE 82.6<br>(33.8 %)       | MBE 115.0<br>(47.1 %)      | MBE 85.6<br>(35.1 %)       | MBE 131.6<br>(53.9 %)      | MBE 191.7<br>(78.5 %)      | MBE 228.0<br>(93.4 %)      | MBE 274.8<br>(112.5 %)     | MBE 232.5<br>(95.2 %)      | MBE 301.0<br>(123.3 %)     | MBE 175.1<br>(71.7 %)      |
| NBDATA: 1435                  | STD 180.4<br>(73.9 %)      | STD 194.8<br>(79.8 %)      | STD 214.2<br>(87.7 %)      | STD 196.7<br>(80.5 %)      | STD 195.7<br>(80.2 %)      | STD 213.3<br>(87.4 %)      | STD 235.2<br>(96.3 %)      | STD 264.0<br>(108.1 %)     | STD 238.0<br>(97.5 %)      | STD 247.5<br>(101.4 %)     | STD 250.6<br>(102.6 %)     |
| MEANREF: 244.2                | RMSE<br>189.3 (77.5<br>%)  | RMSE<br>211.6 (86.7<br>%)  | RMSE<br>243.1 (99.6<br>%)  | RMSE<br>214.5 (87.8<br>%)  | RMSE<br>235.8 (96.6<br>%)  | RMSE<br>286.8<br>(117.5 %) | RMSE<br>327.6<br>(134.2 %) | RMSE<br>381.1<br>(156.1 %) | RMSE<br>332.7<br>(136.3 %) | RMSE<br>389.7<br>(159.6 %) | RMSE<br>305.7<br>(125.2 %) |
|                               | CC 0.579                   | CC 0.579                   | CC 0.579                   | CC 0.580                   | CC 0.616                   | CC 0.723                   | CC 0.723                   | CC 0.723                   | CC 0.724                   | CC 0.758                   | CC 0.598                   |
| Valenciennes                  | MBE 56.8<br>(31.1 %)       | MBE 76.8<br>(42.0 %)       | MBE 102.5<br>(56.1 %)      | MBE 66.7<br>(36.5 %)       | MBE 105.8<br>(57.9 %)      | MBE 84.3<br>(46.1 %)       | MBE 106.5<br>(58.3 %)      | MBE 135.2<br>(74.0 %)      | MBE 95.6<br>(52.3 %)       | MBE 136.6<br>(74.7 %)      | MBE 95.9<br>(52.5 %)       |
| NBDATA: 910                   | STD 103.8<br>(56.8 %)      | STD 111.6<br>(61.1 %)      | STD 122.6<br>(67.1 %)      | STD 107.6<br>(58.8 %)      | STD 110.0<br>(60.2 %)      | STD 141.5<br>(77.4 %)      | STD 157.0<br>(85.9 %)      | STD 177.5<br>(97.1 %)      | STD 149.6<br>(81.8 %)      | STD 165.5<br>(90.6 %)      | STD 135.8<br>(74.3 %)      |

|                |                            |                            |                            |                            |                            |                            |                            |                            |                            |                            |                            |
|----------------|----------------------------|----------------------------|----------------------------|----------------------------|----------------------------|----------------------------|----------------------------|----------------------------|----------------------------|----------------------------|----------------------------|
| MEANREF: 182.8 | RMSE<br>118.3 (64.7<br>%)  | RMSE<br>135.5 (74.1<br>%)  | RMSE<br>159.8 (87.4<br>%)  | RMSE<br>126.6 (69.2<br>%)  | RMSE<br>152.6 (83.5<br>%)  | RMSE<br>164.7 (90.1<br>%)  | RMSE<br>189.7<br>(103.8 %) | RMSE<br>223.1<br>(122.1 %) | RMSE<br>177.5 (97.1<br>%)  | RMSE<br>214.6<br>(117.4 %) | RMSE<br>166.2 (90.9<br>%)  |
|                | CC 0.673                   | CC 0.673                   | CC 0.673                   | CC 0.678                   | CC 0.707                   | CC 0.782                   | CC 0.782                   | CC 0.782                   | CC 0.784                   | CC 0.806                   | CC 0.675                   |
| Villaviciosa   | MBE 32.7<br>(16.0 %)       | MBE 52.4<br>(25.6 %)       | MBE 77.9<br>(38.1 %)       | MBE 44.9<br>(22.0 %)       | MBE 83.4<br>(40.8 %)       | MBE 114.4<br>(56.0 %)      | MBE 141.0<br>(69.0 %)      | MBE 175.2<br>(85.7 %)      | MBE 131.3<br>(64.2 %)      | MBE 181.2<br>(88.7 %)      | MBE 100.1<br>(49.0 %)      |
| NBDATA: 2549   | STD 94.7<br>(46.4 %)       | STD 98.5<br>(48.2 %)       | STD 104.4<br>(51.1 %)      | STD 95.9<br>(46.9 %)       | STD 94.5<br>(46.2 %)       | STD 143.7<br>(70.3 %)      | STD 159.6<br>(78.1 %)      | STD 180.6<br>(88.4 %)      | STD 153.7<br>(75.2 %)      | STD 172.5<br>(84.4 %)      | STD 119.8<br>(58.6 %)      |
| MEANREF: 204.4 | RMSE<br>100.2 (49.0<br>%)  | RMSE<br>111.6 (54.6<br>%)  | RMSE<br>130.2 (63.7<br>%)  | RMSE<br>105.9 (51.8<br>%)  | RMSE<br>126.0 (61.7<br>%)  | RMSE<br>183.7 (89.9<br>%)  | RMSE<br>212.9<br>(104.2 %) | RMSE<br>251.6<br>(123.1 %) | RMSE<br>202.1 (98.9<br>%)  | RMSE<br>250.2<br>(122.4 %) | RMSE<br>156.1 (76.4<br>%)  |
|                | CC 0.668                   | CC 0.668                   | CC 0.668                   | CC 0.677                   | CC 0.707                   | CC 0.787                   | CC 0.787                   | CC 0.787                   | CC 0.792                   | CC 0.809                   | CC 0.700                   |
| Vitoria        | MBE 126.8<br>(65.2 %)      | MBE 153.7<br>(78.9 %)      | MBE 188.2<br>(96.7 %)      | MBE 140.3<br>(72.1 %)      | MBE 185.7<br>(95.4 %)      | MBE 141.2<br>(72.6 %)      | MBE 169.2<br>(86.9 %)      | MBE 205.3<br>(105.5 %)     | MBE 155.7<br>(80.0 %)      | MBE 199.8<br>(102.6 %)     | MBE 140.4<br>(72.1 %)      |
| NBDATA: 2095   | STD 140.8<br>(72.3 %)      | STD 153.8<br>(79.0 %)      | STD 171.3<br>(88.0 %)      | STD 147.2<br>(75.6 %)      | STD 149.5<br>(76.8 %)      | STD 182.9<br>(94.0 %)      | STD 201.8<br>(103.7 %)     | STD 226.6<br>(116.4 %)     | STD 193.1<br>(99.2 %)      | STD 206.0<br>(105.8 %)     | STD 189.2<br>(97.2 %)      |
| MEANREF: 194.7 | RMSE<br>189.5 (97.4<br>%)  | RMSE<br>217.4<br>(111.7 %) | RMSE<br>254.5<br>(130.7 %) | RMSE<br>203.3<br>(104.5 %) | RMSE<br>238.5<br>(122.5 %) | RMSE<br>231.1<br>(118.7 %) | RMSE<br>263.4<br>(135.3 %) | RMSE<br>305.8<br>(157.1 %) | RMSE<br>248.1<br>(127.4 %) | RMSE<br>287.0<br>(147.4 %) | RMSE<br>235.6<br>(121.0 %) |
|                | CC 0.676                   | CC 0.676                   | CC 0.676                   | CC 0.683                   | CC 0.716                   | CC 0.728                   | CC 0.728                   | CC 0.728                   | CC 0.732                   | CC 0.761                   | CC 0.605                   |
| Zaragoza       | MBE 166.9<br>(84.9 %)      | MBE 197.3<br>(100.3 %)     | MBE 236.3<br>(120.2 %)     | MBE 182.6<br>(92.9 %)      | MBE 226.6<br>(115.2 %)     | MBE 170.9<br>(86.9 %)      | MBE 201.5<br>(102.5 %)     | MBE 241.0<br>(122.6 %)     | MBE 187.4<br>(95.3 %)      | MBE 229.3<br>(116.6 %)     | MBE 197.5<br>(100.4 %)     |
| NBDATA: 1140   | STD 209.7<br>(106.7 %)     | STD 230.1<br>(117.0 %)     | STD 256.7<br>(130.5 %)     | STD 221.5<br>(112.7 %)     | STD 222.3<br>(113.1 %)     | STD 238.8<br>(121.5 %)     | STD 263.3<br>(133.9 %)     | STD 295.2<br>(150.1 %)     | STD 253.6<br>(129.0 %)     | STD 262.4<br>(133.4 %)     | STD 251.6<br>(128.0 %)     |
| MEANREF: 196.6 | RMSE<br>268.1<br>(136.3 %) | RMSE<br>303.0<br>(154.1 %) | RMSE<br>348.9<br>(177.4 %) | RMSE<br>287.1<br>(146.0 %) | RMSE<br>317.4<br>(161.4 %) | RMSE<br>293.7<br>(149.4 %) | RMSE<br>331.6<br>(168.6 %) | RMSE<br>381.1<br>(193.8 %) | RMSE<br>315.3<br>(160.4 %) | RMSE<br>348.4<br>(177.2 %) | RMSE<br>319.8<br>(162.7 %) |
|                | CC 0.651                   | CC 0.651                   | CC 0.651                   | CC 0.656                   | CC 0.685                   | CC 0.731                   | CC 0.731                   | CC 0.731                   | CC 0.734                   | CC 0.764                   | CC 0.636                   |

---

*Table S3: Validation results for the comparison between the 11 methods to estimate PAR from satellite imagery at the 33 in-situ stations in overcast conditions (PAR CMF<0.3)*

---
